# Supplementary material for: Development and validation of a novel 3-gene prognostic model for pancreatic adenocarcinoma based on ferroptosis-related genes
Source: Cancer Cell Int. 2022 Jan 15;22:21. doi: 10.1186/s12935-021-02431-8 (PMC8760727; doi:10.1186/s12935-021-02431-8)
Supplement: Supplementary file 1 — Additional file 1. Different expressed genes (DEGs) between three clusters. [file 12935_2021_2431_MOESM1_ESM.xlsx]

## Sheet: Sheet1
Cluster1 vs Cluster2						Cluster1 vs Cluster3						Cluster2 vs Cluster3
gene	conMean	treatMean	logFC	pValue	fdr	gene	conMean	treatMean	logFC	pValue	fdr	gene	conMean	treatMean	logFC	pValue	fdr
TSPAN6	3.14456	3.26699	0.0551003	0.12657	0.225749	TSPAN6	3.14456	3.05484	-0.0417637	0.984514	0.987581	TSPAN6	3.26699	3.05484	-0.0968641	0.101665	0.201404
TNMD	0.0357969	0.096151	1.42547	0.0184	0.0603603	TNMD	0.0357969	0.276966	2.9518	0.000708531	0.00334247	TNMD	0.096151	0.276966	1.52633	0.217077	0.335944
DPM1	4.71489	4.58152	-0.0414	0.00904258	0.0369091	DPM1	4.71489	4.69189	-0.00705528	0.17688	0.261122	DPM1	4.58152	4.69189	0.0343447	0.0634549	0.146673
SCYL3	2.0171	1.7674	-0.190659	0.0050643	0.0251694	SCYL3	2.0171	1.79395	-0.169145	0.00362795	0.0122154	C1orf112	0.843228	0.921586	0.128196	0.0654323	0.149365
C1orf112	0.974796	0.843228	-0.209177	0.00992703	0.0393534	C1orf112	0.974796	0.921586	-0.0809805	0.311478	0.401704	FGR	2.43317	2.68847	0.14395	0.118946	0.223895
FGR	1.93611	2.43317	0.329675	0.00559126	0.0268527	FGR	1.93611	2.68847	0.473625	3.91771e-05	0.000333064	CFH	3.76868	4.03481	0.0984419	0.0452745	0.116607
CFH	3.47337	3.76868	0.117723	0.138967	0.240524	CFH	3.47337	4.03481	0.216164	0.00149824	0.00604487	FUCA2	4.56128	4.53903	-0.00705384	0.515289	0.603194
FUCA2	4.61134	4.56128	-0.0157465	0.429558	0.527322	FUCA2	4.61134	4.53903	-0.0228004	0.150105	0.229545	GCLC	2.28697	2.29414	0.00451549	0.867645	0.891339
GCLC	2.2126	2.28697	0.0476915	0.41564	0.514804	GCLC	2.2126	2.29414	0.052207	0.514632	0.587348	NFYA	2.882	3.04395	0.0788742	0.0433462	0.11312
NFYA	3.22649	2.882	-0.162895	0.00135578	0.0105021	NFYA	3.22649	3.04395	-0.0840206	0.0467893	0.0924237	STPG1	1.18498	1.25708	0.0852037	0.252736	0.371501
NIPAL3	2.24192	2.42169	0.111281	0.0288602	0.0814471	STPG1	1.181	1.25708	0.0900587	0.322203	0.412195	NIPAL3	2.42169	2.43124	0.00567397	0.768381	0.810058
LAS1L	3.06818	2.8993	-0.0816799	0.0332333	0.0895059	NIPAL3	2.24192	2.43124	0.116955	0.0274897	0.0608688	SEMA3F	2.83321	3.02384	0.0939454	0.352818	0.465181
SEMA3F	2.9417	2.83321	-0.0542122	0.49798	0.585824	LAS1L	3.06818	2.96018	-0.0516968	0.04266	0.0859923	CFTR	5.26286	3.30194	-0.672531	3.60708e-09	6.37313e-07
CFTR	3.55575	5.26286	0.565694	1.03126e-07	1.79068e-05	ENPP4	2.64601	2.75706	0.0593147	0.691713	0.737783	ANKIB1	2.89331	3.20329	0.146832	0.000675772	0.00635532
ANKIB1	2.9732	2.89331	-0.0392944	0.482847	0.572964	CFTR	3.55575	3.30194	-0.106837	0.379388	0.466121	KRIT1	2.30905	2.55219	0.144437	0.000986982	0.00827602
CYP51A1	1.43143	1.29976	-0.139207	0.337879	0.445912	ANKIB1	2.9732	3.20329	0.107537	0.0150209	0.0378896	RAD52	1.46897	1.51945	0.0487507	0.290521	0.408955
KRIT1	2.36039	2.30905	-0.0317221	0.434256	0.531643	CYP51A1	1.43143	1.31058	-0.127247	0.193426	0.279895	MYH16	0.333293	0.437839	0.393607	0.659504	0.721293
RAD52	1.66206	1.46897	-0.17817	0.0825137	0.16829	KRIT1	2.36039	2.55219	0.112715	0.0388431	0.0799407	BAD	4.40959	4.20326	-0.0691349	0.156286	0.269215
MYH16	0.640478	0.333293	-0.942355	0.0225113	0.069111	RAD52	1.66206	1.51945	-0.129419	0.259071	0.34978	LAP3	4.64537	4.73143	0.0264826	0.49487	0.58679
BAD	4.5958	4.40959	-0.0596724	0.295292	0.40578	MYH16	0.640478	0.437839	-0.548748	0.0668148	0.122214	CD99	6.02134	6.49855	0.110033	7.41846e-06	0.000232984
LAP3	4.46354	4.64537	0.0576042	0.12459	0.223344	BAD	4.5958	4.20326	-0.128807	0.00620215	0.0188093	HS3ST1	2.42019	2.37237	-0.028787	0.853296	0.879271
CD99	5.96492	6.02134	0.0135833	0.662055	0.722025	LAP3	4.46354	4.73143	0.0840868	0.0290867	0.0637009	AOC1	4.28274	3.57061	-0.262364	0.0302758	0.0884314
HS3ST1	3.25982	2.42019	-0.429672	3.68839e-05	0.00108654	CD99	5.96492	6.49855	0.123616	6.95875e-06	8.40153e-05	WNT16	0.158266	0.207078	0.387822	0.0036062	0.0203511
AOC1	4.83399	4.28274	-0.174681	0.0489695	0.11753	HS3ST1	3.25982	2.37237	-0.458459	5.4972e-06	6.92589e-05	HECW1	0.173141	0.286151	0.724827	0.000552309	0.0054664
WNT16	0.105022	0.158266	0.591659	0.25145	0.36381	AOC1	4.83399	3.57061	-0.437045	8.78783e-06	0.000101194	MAD1L1	2.34202	2.48821	0.0873548	0.350457	0.463698
HECW1	0.157795	0.173141	0.133901	0.472899	0.564418	WNT16	0.105022	0.207078	0.979481	0.000398498	0.00209659	LASP1	5.38623	5.50534	0.0315563	0.607496	0.679751
MAD1L1	2.61223	2.34202	-0.157528	0.00969897	0.0387405	HECW1	0.157795	0.286151	0.858729	0.000164275	0.00103553	SNX11	2.96428	3.11724	0.0725866	0.106527	0.207802
LASP1	5.54907	5.38623	-0.0429693	0.0944996	0.184692	MAD1L1	2.61223	2.48821	-0.0701729	0.04266	0.0859923	TMEM176A	4.9525	5.0942	0.0406995	0.469264	0.566335
TMEM176A	5.15284	4.9525	-0.0572122	0.362693	0.468356	LASP1	5.54907	5.50534	-0.011413	0.137935	0.215007	M6PR	4.06274	4.24881	0.0646062	0.11364	0.217313
M6PR	3.96096	4.06274	0.0366006	0.429558	0.527322	SNX11	3.01647	3.11724	0.0474072	0.185937	0.271402	KLHL13	0.603253	0.585943	-0.0420014	0.585333	0.662039
KLHL13	0.367594	0.603253	0.714648	0.000207956	0.00323698	TMEM176A	5.15284	5.0942	-0.0165127	0.581074	0.643193	CYP26B1	0.56653	0.891863	0.654669	3.63159e-05	0.000745537
CYP26B1	0.53075	0.56653	0.0941215	0.593815	0.665438	M6PR	3.96096	4.24881	0.101207	0.018561	0.0447772	ICA1	3.42075	3.30102	-0.0514004	0.268207	0.387278
ICA1	3.86442	3.42075	-0.175941	0.000161097	0.0027361	KLHL13	0.367594	0.585943	0.672647	7.76795e-05	0.000570207	DBNDD1	2.19682	1.9633	-0.162135	0.0438217	0.113991
DBNDD1	2.4885	2.19682	-0.179862	0.0244775	0.0731396	CYP26B1	0.53075	0.891863	0.748791	3.15206e-05	0.000277866	ALS2	1.76832	1.89063	0.0964911	0.0681476	0.153528
ALS2	1.92621	1.76832	-0.123386	0.0517993	0.122203	ICA1	3.86442	3.30102	-0.227342	1.82915e-07	5.01005e-06	CASP10	2.22673	2.18919	-0.0245251	0.789394	0.827053
CASP10	2.48864	2.22673	-0.160433	0.0113984	0.0432717	DBNDD1	2.4885	1.9633	-0.341997	0.000125572	0.000838219	CFLAR	2.85668	2.96918	0.0557266	0.0681476	0.153528
CFLAR	3.03696	2.85668	-0.0882878	0.0211281	0.0662022	ALS2	1.92621	1.89063	-0.0268947	0.469226	0.547166	TFPI	2.90956	3.04618	0.0662003	0.0355058	0.0986668
TFPI	3.14296	2.90956	-0.11132	0.141121	0.243176	CASP10	2.48864	2.18919	-0.184958	0.00836251	0.0238086	NDUFAF7	1.90764	2.12375	0.154825	4.97716e-05	0.0009368
NDUFAF7	2.13216	1.90764	-0.160531	0.000939107	0.0083451	CFLAR	3.03696	2.96918	-0.0325612	0.376389	0.46321	RBM5	3.07202	3.35676	0.127881	0.00320653	0.0188039
MTMR7	0.283217	0.390009	0.461597	0.00169094	0.0121835	NDUFAF7	2.13216	2.12375	-0.00570614	0.822284	0.849442	MTMR7	0.390009	0.657558	0.753612	0.0272753	0.082653
SLC7A2	1.67598	2.61773	0.643314	7.64581e-07	7.37056e-05	RBM5	3.21177	3.35676	0.0637033	0.0801651	0.140895	SLC7A2	2.61773	2.61164	-0.00336048	0.491988	0.584208
ARF5	6.28533	6.11665	-0.0392456	0.0717909	0.153042	MTMR7	0.283217	0.657558	1.21521	4.69141e-06	6.11227e-05	ARF5	6.11665	6.06189	-0.0129751	0.234288	0.353335
SARM1	0.712221	0.821549	0.206022	0.0352745	0.0931632	SLC7A2	1.67598	2.61164	0.639953	5.07902e-06	6.50778e-05	SARM1	0.821549	0.937709	0.190794	0.0768538	0.166499
POLDIP2	5.5525	5.45724	-0.0249683	0.0332333	0.0895059	ARF5	6.28533	6.06189	-0.0522207	8.13605e-05	0.000591019	POLDIP2	5.45724	5.40685	-0.0133829	0.125567	0.232303
PLXND1	3.43474	3.61237	0.0727442	0.0868554	0.174309	SARM1	0.712221	0.937709	0.396816	0.000183505	0.00113331	PLXND1	3.61237	4.02944	0.157635	5.70391e-05	0.00103586
AK2	4.10516	3.95315	-0.054435	0.0993392	0.191104	POLDIP2	5.5525	5.40685	-0.0383512	0.000329455	0.00180131	AK2	3.95315	4.01937	0.0239672	0.699638	0.753601
CD38	0.521193	0.850498	0.70649	0.0094756	0.0381096	PLXND1	3.43474	4.02944	0.230379	1.52771e-07	4.40776e-06	CD38	0.850498	0.994399	0.225517	0.241549	0.36075
FKBP4	4.90559	4.53687	-0.112729	0.00312374	0.0181932	AK2	4.10516	4.01937	-0.0304678	0.139413	0.216863	FKBP4	4.53687	4.39309	-0.046461	0.500659	0.591351
KDM1A	3.82409	3.80995	-0.00534572	0.627537	0.693388	CD38	0.521193	0.994399	0.932008	3.91771e-05	0.000333064	KDM1A	3.80995	4.01188	0.0745075	0.00554207	0.027278
RBM6	3.51962	3.34956	-0.0714452	0.161677	0.26732	FKBP4	4.90559	4.39309	-0.15919	0.000122769	0.000824307	RBM6	3.34956	3.63986	0.11991	0.00586116	0.0284447
CAMKK1	1.12376	1.34128	0.255273	0.00060702	0.00632024	KDM1A	3.82409	4.01188	0.0691618	0.0432303	0.0868913	CAMKK1	1.34128	1.55885	0.216872	0.00495048	0.0252936
RECQL	2.37235	2.51949	0.0868148	0.209444	0.320167	RBM6	3.51962	3.63986	0.0484647	0.148541	0.227626	RECQL	2.51949	3.01225	0.257713	8.37454e-05	0.0013758
HSPB6	3.29808	3.93648	0.255278	0.000375436	0.00467931	CAMKK1	1.12376	1.55885	0.472145	6.92699e-09	4.47987e-07	CCDC132	1.64967	1.73363	0.0716132	0.131301	0.239338
ARHGAP33	1.5047	1.32664	-0.181706	0.0537609	0.125349	RECQL	2.37235	3.01225	0.344528	9.86811e-07	1.82166e-05	HSPB6	3.93648	4.36723	0.149813	0.0615272	0.143795
NDUFAB1	4.88526	4.61451	-0.0822578	0.00304349	0.0179011	CCDC132	1.66289	1.73363	0.0601047	0.201134	0.288124	ARHGAP33	1.32664	1.5818	0.253791	0.0129163	0.0492792
PDK4	3.32651	4.25124	0.353872	4.70049e-05	0.00126474	HSPB6	3.29808	4.36723	0.405092	2.3316e-06	3.56269e-05	PDK4	4.25124	4.58531	0.109137	0.268207	0.387278
SLC22A16	0.06138	0.0714968	0.220109	0.467949	0.560038	NDUFAB1	4.88526	4.59289	-0.0890317	5.86943e-05	0.000456087	SLC22A16	0.0714968	0.120849	0.757253	0.00268198	0.0165694
ABCB5	0.0416422	0.0574013	0.46304	0.0359782	0.0943976	PDK4	3.32651	4.58531	0.463009	3.40595e-06	4.77166e-05	ABCB5	0.0574013	0.102095	0.830759	0.00721022	0.0328783
ARX	0.729744	0.841025	0.204758	0.145506	0.248261	SLC22A16	0.06138	0.120849	0.977363	0.000233486	0.00137034	SLC25A13	3.0762	3.15504	0.0365091	0.311863	0.429439
SLC25A13	3.27775	3.0762	-0.0915557	0.0770003	0.160595	ABCB5	0.0416422	0.102095	1.2938	4.97438e-05	0.000401692	ST7	2.31548	2.30192	-0.00846902	0.676116	0.734271
ST7	2.35259	2.31548	-0.0229406	0.523752	0.607829	ARX	0.729744	1.01345	0.47381	0.474342	0.55177	CDC27	2.96981	3.26252	0.135615	5.60758e-06	0.000188892
CDC27	2.99411	2.96981	-0.011756	0.901072	0.918619	SLC25A13	3.27775	3.15504	-0.0550466	0.261419	0.352239	SLC4A1	0.0136977	0.029456	1.10463	0.332161	0.447182
CALCR	0.0352766	0.0603489	0.774617	0.00275936	0.0168319	ST7	2.35259	2.30192	-0.0314096	0.270958	0.362044	CALCR	0.0603489	0.0869968	0.527635	0.0531553	0.13028
HCCS	3.5148	3.30377	-0.0893314	0.0282778	0.0804205	CDC27	2.99411	3.26252	0.123859	5.73286e-05	0.00044766	HCCS	3.30377	3.37027	0.028751	0.990893	0.992669
DVL2	2.52725	2.54892	0.0123158	0.393046	0.495646	SLC4A1	0.0146685	0.029456	1.00584	0.026817	0.05973	DVL2	2.54892	2.85309	0.162638	2.28793e-05	0.000535076
PRSS22	4.92885	4.06967	-0.276341	3.8191e-05	0.00111798	CALCR	0.0352766	0.0869968	1.30225	1.02111e-05	0.000114841	SKAP2	3.53349	3.84506	0.121912	0.00276368	0.0169055
UPF1	4.21895	4.11558	-0.035787	0.0944996	0.184692	HCCS	3.5148	3.37027	-0.0605804	0.0117152	0.0311442	SLC25A5	7.42067	7.07686	-0.0684408	1.08685e-05	0.00030403
SLC25A5	7.44213	7.42067	-0.00416641	0.588276	0.660741	DVL2	2.52725	2.85309	0.174954	7.64715e-07	1.49244e-05	CCDC109B	2.62566	2.91829	0.15244	0.00188987	0.0130434
CCDC109B	2.72374	2.62566	-0.0529042	0.528987	0.611974	PRSS22	4.92885	3.97046	-0.311946	0.000104735	0.000723923	HOXA11	0.369852	0.642548	0.796856	0.0114157	0.0451454
HOXA11	0.578501	0.369852	-0.645371	0.127516	0.227233	UPF1	4.21895	4.11683	-0.0353498	0.0299148	0.0651359	POLR2J	4.54459	4.44755	-0.0311402	0.397022	0.504891
POLR2J	4.8799	4.54459	-0.1027	0.0061672	0.0285731	SKAP2	3.67518	3.84506	0.0651926	0.168156	0.250841	DHX33	1.9774	2.16669	0.131891	0.00376764	0.020993
MEOX1	1.25659	1.89033	0.58912	0.000492879	0.00554484	SLC25A5	7.44213	7.07686	-0.0726072	3.38992e-05	0.000294753	MEOX1	1.89033	1.83199	-0.0452276	0.676116	0.734271
THSD7A	0.623677	0.829537	0.411509	0.00663364	0.0300227	CCDC109B	2.72374	2.91829	0.0995354	0.0278817	0.0615417	THSD7A	0.829537	1.02333	0.302898	0.0302758	0.0884314
LIG3	1.47688	1.37809	-0.0998744	0.161677	0.26732	HOXA11	0.578501	0.642548	0.151485	0.633352	0.688582	LIG3	1.37809	1.47883	0.101778	0.00848406	0.0366937
RPAP3	2.42916	2.35525	-0.0445817	0.453345	0.547839	POLR2J	4.8799	4.44755	-0.13384	3.07637e-05	0.000273126	RPAP3	2.35525	2.53313	0.105041	0.00848406	0.0366937
ACSM3	1.55577	2.19489	0.49652	5.97792e-06	0.000318321	DHX33	2.0013	2.16669	0.114554	0.0101546	0.0278187	ACSM3	2.19489	1.28688	-0.770279	6.05789e-10	1.55048e-07
CIAPIN1	3.71098	3.51637	-0.0777126	0.0288602	0.0814471	MEOX1	1.25659	1.83199	0.543892	0.00191617	0.00735605	CIAPIN1	3.51637	3.58983	0.0298289	0.486252	0.57976
SPPL2B	3.60304	3.12255	-0.20649	0.00199063	0.013527	THSD7A	0.623677	1.02333	0.714407	1.07919e-05	0.000119609	SPPL2B	3.12255	3.19945	0.0350979	0.792911	0.829817
FAM214B	3.2703	2.722	-0.264755	0.00139403	0.0107035	LIG3	1.47688	1.47883	0.00190391	0.691713	0.737783	FAM214B	2.722	2.93791	0.110122	0.11157	0.214569
COPZ2	2.97811	3.16207	0.0864685	0.0883429	0.176433	RPAP3	2.42916	2.53313	0.060459	0.158118	0.238999	COPZ2	3.16207	3.6047	0.18901	0.000372232	0.00412376
PRKAR2B	1.20176	2.13046	0.826009	2.24857e-09	2.56394e-06	ACSM3	1.55577	1.28688	-0.273759	0.0128705	0.0336288	PRKAR2B	2.13046	2.09278	-0.0257432	0.477717	0.5728
CREBBP	2.71067	2.83357	0.0639685	0.0717909	0.153042	AC004381.6	0.845884	0.857273	0.0192959	0.835252	0.860852	MSL3	2.25386	2.48441	0.140502	0.00730967	0.0332033
BZRAP1	1.1231	1.18392	0.0760936	0.45819	0.551977	CIAPIN1	3.71098	3.58983	-0.0478837	0.042096	0.085101	CREBBP	2.83357	2.89958	0.0332225	0.652906	0.715906
MPO	0.135774	0.16274	0.26136	0.0152669	0.0529662	SPPL2B	3.60304	3.19945	-0.171392	0.00303392	0.0105706	BZRAP1	1.18392	1.31713	0.153821	0.545202	0.628272
PON1	0.360721	0.289507	-0.317283	0.633231	0.698085	FAM214B	3.2703	2.93791	-0.154633	0.0134851	0.034872	MPO	0.16274	0.215789	0.407052	0.126131	0.233189
GCFC2	1.84719	1.85795	0.00838143	0.788189	0.824248	COPZ2	2.97811	3.6047	0.275479	5.2687e-07	1.11896e-05	PON1	0.289507	0.344856	0.252397	0.172918	0.288331
WDR54	2.5459	2.41016	-0.0790477	0.26668	0.378481	PRKAR2B	1.20176	2.09278	0.800266	2.78867e-08	1.2582e-06	GCFC2	1.85795	1.93242	0.0566965	0.200298	0.318713
CROT	2.11753	2.01327	-0.0728372	0.236842	0.348802	MSL3	2.2678	2.48441	0.131606	0.00878178	0.0247271	WDR54	2.41016	2.67059	0.14803	0.0260263	0.0800761
ABCB4	0.387918	0.335687	-0.208635	0.443742	0.539711	CREBBP	2.71067	2.89958	0.0971909	0.0130725	0.0340233	CROT	2.01327	2.09239	0.0556105	0.0979051	0.19647
KMT2E	3.25756	3.11962	-0.0624253	0.287954	0.398951	BZRAP1	1.1231	1.31713	0.229915	0.180462	0.265079	ABCB4	0.335687	0.650354	0.954107	2.42698e-06	0.000100099
RHBDD2	5.73899	5.47442	-0.0680904	0.0159549	0.0545676	MPO	0.135774	0.215789	0.668412	5.86943e-05	0.000456087	KMT2E	3.11962	3.35714	0.105864	0.0320622	0.0918756
SOX8	1.34172	1.13719	-0.23861	0.800559	0.834686	GCFC2	1.84719	1.93242	0.0650779	0.158118	0.238999	RHBDD2	5.47442	5.65087	0.0457677	0.458124	0.557138
IBTK	2.95902	2.90186	-0.0281424	0.550191	0.629446	ABCB4	0.387918	0.650354	0.745472	0.00061573	0.00298085	SOX8	1.13719	1.0412	-0.127229	0.280228	0.399288
ZNF195	2.24222	2.05333	-0.126962	0.0381616	0.0982273	KMT2E	3.25756	3.35714	0.043439	0.419708	0.502324	IBTK	2.90186	2.99974	0.0478585	0.0753428	0.164331
MYCBP2	1.98339	2.24405	0.178134	0.00862732	0.0357735	RHBDD2	5.73899	5.65087	-0.0223227	0.0362979	0.0758357	ZNF195	2.05333	2.0922	0.0270563	0.867645	0.891339
FBXL3	2.76472	2.90516	0.0714835	0.039679	0.101008	SOX8	1.34172	1.0412	-0.365839	0.243045	0.332964	MYCBP2	2.24405	2.51202	0.162746	0.0269583	0.0820767
ITGAL	1.3926	2.00878	0.528541	0.000436987	0.00513079	IBTK	2.95902	2.99974	0.0197161	0.496902	0.571416	FBXL3	2.90516	3.03757	0.0643015	0.223688	0.342689
PDK2	2.06143	2.314	0.166739	0.0050643	0.0251694	ZNF195	2.24222	2.0922	-0.099906	0.0393699	0.0807459	PDK2	2.314	2.11194	-0.131815	0.00107023	0.00877
ITGA3	5.70854	5.1052	-0.161155	0.00469901	0.0239325	MYCBP2	1.98339	2.51202	0.34088	6.77963e-06	8.20949e-05	ITGA3	5.1052	5.28629	0.0502867	0.503568	0.593966
ZFX	1.74739	1.93544	0.14746	0.0198195	0.063301	FBXL3	2.76472	3.03757	0.135785	0.000567326	0.00279613	ZFX	1.93544	2.09164	0.111971	0.0988346	0.197712
LAMP2	4.81269	4.93003	0.0347518	0.224367	0.335962	ITGAL	1.3926	2.12704	0.611065	0.0003025	0.00168252	LAMP2	4.93003	5.04346	0.0328191	0.203526	0.322183
ITGA2B	0.103967	0.100924	-0.0428523	0.42025	0.518789	ITGA3	5.70854	5.28629	-0.110868	0.0455765	0.0904835	ITGA2B	0.100924	0.170362	0.755333	0.000119734	0.00177436
ASB4	0.151251	0.17629	0.221004	0.0319267	0.0870934	ZFX	1.74739	2.09164	0.259431	3.3088e-05	0.000288664	ASB4	0.17629	0.330296	0.905811	0.998179	0.99858
GDE1	4.19839	4.07009	-0.0447741	0.0929291	0.182837	LAMP2	4.81269	5.04346	0.067571	0.0199918	0.0473907	GDE1	4.07009	4.1307	0.0213249	0.491988	0.584208
C19orf60	3.37423	3.00333	-0.167994	0.0345825	0.09197	ITGA2B	0.103967	0.170362	0.71248	0.00218322	0.00813595	C19orf60	3.00333	2.96096	-0.0204977	0.643058	0.7082
CRLF1	1.1514	1.31943	0.196527	0.17917	0.287669	ASB4	0.151251	0.330296	1.12682	0.0438057	0.087798	CRLF1	1.31943	1.53384	0.21723	0.0467677	0.119275
OSBPL7	3.46685	2.80253	-0.306893	0.000572121	0.0060884	GDE1	4.19839	4.1307	-0.0234492	0.234206	0.323753	OSBPL7	2.80253	2.74289	-0.0310338	0.910933	0.926289
TMEM98	3.85956	4.03869	0.0654493	0.259836	0.371558	C19orf60	3.37423	2.96096	-0.188491	0.0103183	0.0281677	TMEM98	4.03869	3.67827	-0.134858	0.0139451	0.0519311
YBX2	0.331146	0.27091	-0.289655	0.518543	0.603765	CRLF1	1.1514	1.53384	0.413757	0.00417729	0.013662	YBX2	0.27091	0.232614	-0.219873	0.560474	0.64107
MAP3K14	2.1361	2.28966	0.100149	0.0622375	0.138594	OSBPL7	3.46685	2.74289	-0.337927	3.99947e-06	5.42028e-05	CACNG3	0.0256057	0.0175451	-0.54539	0.000650707	0.00620915
ABCC8	1.46043	2.52007	0.78707	0.000195168	0.003116	TMEM98	3.85956	3.67827	-0.0694088	0.370433	0.457493	TMEM132A	2.75998	3.04611	0.14231	0.041946	0.110743
CACNG3	0.0137802	0.0256057	0.893862	0.0203101	0.0644556	YBX2	0.331146	0.232614	-0.509528	0.203095	0.290136	AP2B1	5.02939	5.27399	0.0685119	0.00399286	0.0218043
AP2B1	5.30003	5.02939	-0.0756175	0.00183517	0.0128292	MAP3K14	2.1361	2.37006	0.149943	0.0353204	0.0742482	TAC1	0.430584	0.695314	0.69137	0.036497	0.100736
ZNF263	2.638	2.53531	-0.0572805	0.41564	0.514804	ABCC8	1.46043	2.70891	0.891317	0.0031451	0.0108799	CX3CL1	3.58912	3.54734	-0.016894	0.518242	0.605847
SPATA20	4.03735	3.78252	-0.0940617	0.0149328	0.0521892	TMEM132A	2.79908	3.04611	0.122016	0.0719171	0.12953	SPATA20	3.78252	3.82037	0.014365	0.630026	0.697804
CACNA1G	0.0671522	0.0866608	0.367945	0.588276	0.660741	AP2B1	5.30003	5.27399	-0.00710559	0.407042	0.490793	CACNA1G	0.0866608	0.210229	1.27851	7.53565e-07	4.26387e-05
TNFRSF12A	6.13194	5.73106	-0.0975401	0.00469901	0.0239325	TAC1	0.620488	0.695314	0.164261	0.0635567	0.117622	DLX6	0.0554518	0.0992171	0.839355	0.041366	0.109883
MAP3K9	1.08633	1.01612	-0.0963893	0.20368	0.314226	ZNF263	2.638	2.55013	-0.0488716	0.127922	0.20282	MAP3K9	1.01612	1.16787	0.200809	0.0396973	0.106751
RALA	4.56763	4.32024	-0.0803345	0.0113984	0.0432717	CX3CL1	3.57603	3.54734	-0.0116192	0.691713	0.737783	RALA	4.32024	4.52257	0.0660308	0.197109	0.314973
BAIAP2L1	5.16229	4.38861	-0.234247	1.46552e-06	0.000120147	SPATA20	4.03735	3.82037	-0.0796968	0.0228108	0.0525725	BAIAP2L1	4.38861	4.25444	-0.0447959	0.512346	0.600929
KDM7A	2.25357	2.00494	-0.168656	0.0412473	0.103893	CACNA1G	0.0671522	0.210229	1.64645	8.84348e-08	2.92908e-06	KDM7A	2.00494	2.21843	0.145978	0.0094413	0.0396503
ETV1	1.88384	1.80584	-0.0610066	0.544851	0.624999	TNFRSF12A	6.13194	5.71181	-0.102395	0.0196982	0.0468692	ETV1	1.80584	2.27035	0.330242	8.53512e-05	0.0013905
AGK	2.20754	2.08343	-0.0834795	0.0271433	0.0782206	DLX6	0.0653213	0.0992171	0.603036	0.0676059	0.123471	AGK	2.08343	2.2347	0.101119	0.0202491	0.0671358
ALDH3B1	4.15134	3.51507	-0.240023	0.000312281	0.00415523	MAP3K9	1.08633	1.16787	0.10442	0.435863	0.516502	ALDH3B1	3.51507	3.45087	-0.0265953	0.723453	0.773683
TTC22	2.78229	2.44657	-0.185509	0.00274094	0.0167415	RALA	4.56763	4.52257	-0.0143037	0.185937	0.271402	TTC22	2.44657	2.28744	-0.0970324	0.320682	0.437317
PHTF2	1.71148	1.76815	0.0469983	0.284331	0.395323	BAIAP2L1	5.16229	4.25444	-0.279043	3.40645e-07	8.07234e-06	PHTF2	1.76815	2.33663	0.402192	1.98604e-10	6.97303e-08
CCL26	1.33143	1.21325	-0.134096	0.588276	0.660741	ETV1	1.88384	2.27035	0.269235	0.00796123	0.0228913	CCL26	1.21325	1.38398	0.189942	0.0776185	0.167546
FARP2	2.22392	2.0008	-0.152525	0.0239725	0.0721239	ALDH3B1	4.15134	3.45087	-0.266618	1.83396e-05	0.000181433	FARP2	2.0008	2.0537	0.0376447	0.47489	0.57066
USH1C	4.65955	3.77816	-0.302506	1.12918e-05	0.000495561	TTC22	2.78229	2.28744	-0.282542	2.02588e-05	0.000195954	USH1C	3.77816	3.69776	-0.0310332	0.659504	0.721293
GGCT	4.4309	4.16319	-0.0899088	0.0177955	0.0589025	PHTF2	1.71148	2.33663	0.44919	3.60714e-12	4.8858e-09	GGCT	4.16319	4.18782	0.00850916	0.889248	0.908692
DBF4	1.51464	1.39838	-0.115217	0.284331	0.395323	CCL26	1.33143	1.38398	0.0558459	0.410187	0.493713	DBF4	1.39838	1.52451	0.124583	0.0709548	0.157827
TBXA2R	0.90202	1.02912	0.190173	0.102674	0.195435	FARP2	2.22392	2.0537	-0.114881	0.0172207	0.0420931	TBXA2R	1.02912	1.23827	0.266926	0.00637091	0.0301858
IFRD1	2.51104	2.54708	0.0205639	0.448529	0.543806	USH1C	4.65955	3.69776	-0.333539	2.87858e-08	1.27862e-06	COX10	2.18467	2.21054	0.0169809	0.63979	0.705792
COX10	2.18143	2.18467	0.00214468	0.393046	0.495646	GGCT	4.4309	4.18782	-0.0813996	0.00757728	0.0219993	PAF1	4.64215	4.94633	0.0915663	0.0183625	0.0627261
GTF2IRD1	2.98789	2.63783	-0.179773	0.00403909	0.0216233	DBF4	1.51464	1.52451	0.00936594	0.659286	0.710577	VPS41	3.28351	3.42938	0.0627058	0.100715	0.200056
PAF1	4.78387	4.64215	-0.0433853	0.401993	0.503612	TBXA2R	0.90202	1.23827	0.457099	9.49367e-06	0.00010802	ARHGAP44	1.32509	1.26545	-0.0664317	0.189297	0.306515
VPS41	3.24737	3.28351	0.0159677	0.429558	0.527322	IFRD1	2.51104	2.56358	0.0298775	0.344366	0.433026	SCIN	1.25086	1.47742	0.240153	0.0864459	0.18036
ARHGAP44	1.20814	1.32509	0.133298	0.212369	0.323454	COX10	2.18143	2.21054	0.0191256	0.211081	0.299305	ARSD	3.84025	3.4374	-0.159884	0.00129722	0.0100554
SCIN	1.69819	1.25086	-0.441074	0.0149328	0.0521892	GTF2IRD1	2.98789	2.72055	-0.135229	0.00770338	0.0222949	PNPLA4	2.45218	2.31456	-0.083325	0.124444	0.230817
ARSD	3.87153	3.84025	-0.0117022	0.571805	0.647234	PAF1	4.78387	4.94633	0.0481809	0.223481	0.312573	MYH13	0.0406853	0.0697732	0.778165	0.00302012	0.0180355
PNPLA4	2.31933	2.45218	0.0803591	0.206547	0.317109	VPS41	3.24737	3.42938	0.0786735	0.0134851	0.034872	ADIPOR2	4.09282	3.93071	-0.058305	0.506485	0.596379
MYH13	0.0382261	0.0406853	0.0899498	0.788186	0.824248	ELAC2	3.20242	3.22183	0.00871924	0.596367	0.656468	CDKL3	0.28252	0.349349	0.306319	0.00410999	0.0222048
ADIPOR2	4.23223	4.09282	-0.0483242	0.130603	0.230632	SCIN	1.69819	1.47742	-0.200921	0.113341	0.184575	UPP2	0.0661323	0.0909557	0.459809	0.248967	0.367996
CDKL3	0.325911	0.28252	-0.206126	0.0428678	0.106772	ARSD	3.87153	3.4374	-0.171586	0.000442539	0.00228817	PRSS21	1.93992	1.72167	-0.172184	0.402129	0.509167
PRSS21	1.8564	1.93992	0.0634878	0.314183	0.424109	MYH13	0.0382261	0.0697732	0.868115	0.00234735	0.00863883	MARK4	2.61099	2.7413	0.070266	0.307514	0.425547
MARK4	2.76679	2.61099	-0.083617	0.0480555	0.115924	ADIPOR2	4.23223	3.93071	-0.106629	0.0228108	0.0525725	PROM1	3.82724	3.22696	-0.246129	0.0324301	0.0925715
PROM1	3.7558	3.82724	0.0271833	0.971211	0.97631	CDKL3	0.325911	0.349349	0.100193	0.536333	0.605817	CEACAM21	0.884586	1.13363	0.357873	0.0548691	0.133048
CCDC124	5.06505	4.8506	-0.0624139	0.0993392	0.191104	UPP2	0.0761494	0.0909557	0.256331	0.465827	0.544222	PAFAH1B1	3.84441	4.13862	0.106389	7.05234e-05	0.0012124
CEACAM21	0.659149	0.884586	0.424398	0.0106401	0.0413002	MARK4	2.76679	2.7413	-0.013351	0.184098	0.26935	KIAA0100	3.73517	4.02911	0.109285	7.05234e-05	0.0012124
PAFAH1B1	3.71519	3.84441	0.0493268	0.0288602	0.0814471	PROM1	3.7558	3.22696	-0.218946	0.0881269	0.151778	SLC13A2	1.09027	0.543451	-1.00447	0.00382195	0.0211627
NOS2	0.249324	0.420466	0.753968	0.0825137	0.16829	CCDC124	5.06505	4.7868	-0.0815165	0.0224814	0.051968	GAS7	2.45876	3.00886	0.291284	0.000115351	0.00172717
DNAH9	0.0510011	0.123921	1.28082	9.03239e-08	1.66125e-05	CEACAM21	0.659149	1.13363	0.78227	5.59929e-05	0.000439988	TRAPPC6A	4.60916	4.41916	-0.0607321	0.0881349	0.182853
KIAA0100	3.73679	3.73517	-0.000622817	0.977607	0.981504	PAFAH1B1	3.71519	4.13862	0.155716	2.78867e-08	1.2582e-06	MATK	0.95068	1.04573	0.137474	0.659504	0.721293
SLC13A2	0.710463	1.09027	0.617854	0.189778	0.299641	NOS2	0.249324	0.409873	0.717156	0.00447935	0.014452	CEACAM7	3.60334	2.99831	-0.265184	0.0602628	0.14175
GAS7	2.00747	2.45876	0.292554	0.00481803	0.0243381	DNAH9	0.0510011	0.149775	1.5542	0.000218732	0.00129987	CD79B	1.87557	2.21387	0.239244	0.775367	0.815602
TRAPPC6A	5.07932	4.60916	-0.140133	0.00266973	0.0164394	KIAA0100	3.73679	4.02911	0.108662	0.000150273	0.000970542	SCN4A	0.0921335	0.144489	0.649166	0.38442	0.494004
MATK	0.663478	0.95068	0.51891	0.00193751	0.0132986	SLC13A2	0.710463	0.543451	-0.386611	0.161398	0.242983	TKTL1	0.0974191	0.0813362	-0.260307	0.530077	0.616028
CD79B	1.36226	1.87557	0.461327	0.00329006	0.0188981	GAS7	2.00747	3.00886	0.583838	1.99906e-09	1.94146e-07	RPUSD1	3.11599	2.98107	-0.063861	0.11157	0.214569
SCN4A	0.0370787	0.0921335	1.31314	4.23781e-06	0.000249313	TRAPPC6A	5.07932	4.41916	-0.200865	2.3316e-06	3.56269e-05	LUC7L	2.73872	3.02676	0.144271	0.0263338	0.0806778
ST7L	1.03666	1.04989	0.0182886	0.656249	0.717092	MATK	0.663478	1.04573	0.656384	0.000884938	0.00399016	CACNA2D2	1.26899	1.62913	0.360417	0.838996	0.867801
TKTL1	0.0263732	0.0974191	1.88513	0.00043043	0.00510093	CEACAM7	3.16285	2.99831	-0.0770754	0.44571	0.525559	BAIAP3	1.94505	2.39248	0.298702	0.0351082	0.0978499
PAX6	0.51305	0.724564	0.498013	0.00519166	0.0255885	CD79B	1.36226	2.21387	0.700571	0.00320208	0.0110476	TSR3	5.12452	5.04058	-0.0238289	0.296818	0.415257
RHBDF1	3.93701	3.40542	-0.209267	8.36466e-05	0.00181414	SCN4A	0.0370787	0.144489	1.9623	1.27014e-06	2.21115e-05	PIGQ	3.2352	3.05298	-0.0836404	0.0148571	0.0542935
LUC7L	3.0865	2.73872	-0.172466	0.0202476	0.0642791	ST7L	1.03666	1.09143	0.0742711	0.263782	0.354672	CRAMP1L	1.48357	1.64848	0.152068	0.00586116	0.0284447
CACNA2D2	0.919413	1.26899	0.464896	9.24318e-05	0.00193126	TKTL1	0.0263732	0.0813362	1.62483	2.82718e-05	0.000257466	TEAD3	3.80654	4.08352	0.101335	0.00127673	0.00993878
TSR3	5.30312	5.12452	-0.0494235	0.18178	0.290707	PAX6	0.51305	1.02095	0.992738	0.00417729	0.013662	SELE	0.965625	1.0662	0.142949	0.376978	0.487345
PIGQ	3.29125	3.2352	-0.0247808	0.691383	0.746785	RPUSD1	3.19263	2.98107	-0.0989157	0.0196982	0.0468692	DNAJC11	2.48064	2.5703	0.0512249	0.314053	0.431305
CRAMP1L	1.60469	1.48357	-0.113228	0.0811062	0.166354	RHBDF1	3.93701	3.39966	-0.21171	0.000114708	0.000779873	FMO3	1.60053	1.45617	-0.136375	0.268207	0.387278
TEAD3	4.23956	3.80654	-0.155435	0.000102083	0.00204723	CACNA2D2	0.919413	1.62913	0.825313	0.00107812	0.00467862	PSMB1	5.63782	5.72936	0.0232361	0.260392	0.379354
SELE	0.647041	0.965625	0.577605	0.0271433	0.0782206	BAIAP3	1.83663	2.39248	0.381447	0.0234822	0.0537567	SYN1	1.24616	1.62251	0.380737	0.0266445	0.0814018
DNAJC11	2.35225	2.48064	0.0766688	0.256459	0.368313	TSR3	5.30312	5.04058	-0.0732524	0.0120897	0.0319617	JARID2	2.08433	2.37772	0.189994	0.000301723	0.00352968
FMO3	1.07138	1.60053	0.579077	0.000353165	0.00449389	PIGQ	3.29125	3.05298	-0.108421	0.00685881	0.0203548	CDKL5	1.19746	1.29356	0.111366	0.132472	0.240847
MYLIP	2.65643	2.96686	0.159448	0.00108286	0.00914579	CRAMP1L	1.60469	1.64848	0.0388404	0.439137	0.5195	CAMK1G	0.557444	0.715694	0.360516	0.0106324	0.0429656
NOX1	1.22811	0.719534	-0.771304	0.00128216	0.0101599	TEAD3	4.23956	4.08352	-0.0540999	0.445726	0.525559	CDK11A	1.32299	1.27706	-0.0509741	0.821197	0.853354
E2F2	0.684623	0.659207	-0.0545787	0.775872	0.814873	SELE	0.647041	1.0662	0.720555	0.00331885	0.0113467	DLEC1	0.22773	0.296864	0.382474	0.163062	0.276972
PSMB1	5.79636	5.63782	-0.0400092	0.0508412	0.120696	DNAJC11	2.35225	2.5703	0.127894	0.0182859	0.0442102	CYTH3	3.07233	3.48232	0.180717	0.000160897	0.00220206
SYN1	1.20014	1.24616	0.0542852	0.782024	0.819486	FMO3	1.07138	1.45617	0.442702	0.00641446	0.019302	ADAM22	1.05925	1.46252	0.465413	8.37454e-05	0.0013758
JARID2	2.02197	2.08433	0.0438276	0.189778	0.299641	MYLIP	2.65643	3.05561	0.201968	5.59929e-05	0.000439988	SYPL1	5.57156	5.49607	-0.0196805	0.274172	0.393114
CDKL5	1.1206	1.19746	0.0957108	0.333852	0.442016	NOX1	1.22811	0.81558	-0.59054	0.00068164	0.00323114	CYB561	4.51843	4.43172	-0.0279556	0.152323	0.264389
CAMK1G	0.464229	0.557444	0.263993	0.0825137	0.16829	E2F2	0.684623	0.65993	-0.052997	0.507501	0.58069	SPAG9	2.8756	3.22484	0.165367	2.58362e-05	0.000585721
CDK11A	1.37026	1.32299	-0.0506576	0.453345	0.547839	PSMB1	5.79636	5.72936	-0.0167731	0.232032	0.321503	CELSR3	0.897927	1.21246	0.433267	0.00741006	0.0335369
DLEC1	0.330474	0.22773	-0.53721	0.00803634	0.0341227	SYN1	1.20014	1.62251	0.435022	0.0245214	0.0556158	AASS	1.24749	1.43843	0.205466	0.021773	0.0705483
CYTH3	2.77555	3.07233	0.146558	0.0136599	0.0491097	JARID2	2.02197	2.37772	0.233822	1.92494e-06	3.07239e-05	MPND	3.47919	3.25198	-0.0974296	0.00217	0.0143649
ADAM22	0.936725	1.05925	0.177343	0.371212	0.476167	CDKL5	1.1206	1.29356	0.207077	0.018561	0.0447772	MGST1	2.97288	2.85717	-0.0572745	0.921802	0.935327
SYPL1	5.81578	5.57156	-0.0618912	0.0374216	0.0969653	CAMK1G	0.464229	0.715694	0.624508	8.52059e-05	0.000613662	CRY1	2.26031	2.60367	0.204026	0.000219023	0.00278725
CYB561	4.71865	4.51843	-0.0625532	0.0136599	0.0491097	CDK11A	1.37026	1.27706	-0.101632	0.344366	0.433026	PGLYRP1	0.12969	0.165965	0.35581	0.195776	0.313668
SPAG9	2.80849	2.8756	0.0340655	0.287954	0.398951	DLEC1	0.330474	0.296864	-0.154736	0.182274	0.267213	ST3GAL1	3.65077	3.80144	0.0583463	0.125567	0.232303
CELSR3	1.07759	0.897927	-0.263143	0.120703	0.218704	CYTH3	2.77555	3.48232	0.327275	9.69532e-10	1.22907e-07	MMP25	0.693866	0.783715	0.175671	0.483398	0.577287
AASS	1.16605	1.24749	0.097398	0.354298	0.460857	ADAM22	0.936725	1.46252	0.642756	6.26109e-07	1.27764e-05	IL32	5.53656	5.04587	-0.133885	0.013083	0.0497143
PLEKHG6	3.13488	2.62053	-0.258548	0.0103975	0.0406024	SYPL1	5.81578	5.49607	-0.0815717	0.000522485	0.00261243	PKD1	2.05385	2.44593	0.252049	3.22251e-05	0.00068412
MPND	3.5874	3.47919	-0.0441908	0.256459	0.368313	CYB561	4.71865	4.43172	-0.0905088	0.00303392	0.0105706	MAPK8IP2	1.16273	1.35405	0.219761	0.761414	0.804199
MGST1	3.50699	2.97288	-0.238372	0.000703121	0.00691398	SPAG9	2.80849	3.22484	0.199433	5.58132e-07	1.17061e-05	RHOBTB2	2.30628	2.52503	0.130737	0.00692021	0.0319536
CRY1	2.29061	2.26031	-0.0192115	0.907425	0.924051	CELSR3	1.07759	1.21246	0.170124	0.459071	0.538327	SEC62	4.15821	4.28154	0.042168	0.0839616	0.176793
PGLYRP1	0.096504	0.12969	0.426404	0.2143	0.326092	AASS	1.16605	1.43843	0.302864	0.00325999	0.0111962	RPS20	7.8769	7.89543	0.00338838	0.646334	0.710921
NFIX	3.78213	3.89251	0.0415013	0.221323	0.332687	PLEKHG6	3.13488	2.47203	-0.342715	0.00118871	0.00505742	CSDE1	6.30712	6.49018	0.0412765	0.00859877	0.0370854
ST3GAL1	3.80599	3.65077	-0.060072	0.047156	0.114316	MPND	3.5874	3.25198	-0.14162	4.97453e-05	0.000401692	UBE3C	3.39299	3.50354	0.0462547	0.187762	0.304986
MMP25	0.562254	0.693866	0.303435	0.0428678	0.106772	MGST1	3.50699	2.85717	-0.295647	0.00171151	0.00672538	REV3L	1.48399	1.70301	0.198603	0.0493484	0.12368
IL32	5.35704	5.53656	0.0475518	0.429558	0.527322	CRY1	2.29061	2.60367	0.184815	0.00061573	0.00298085	TENM1	0.107094	0.194129	0.858139	0.000398971	0.00435307
PKD1	2.05529	2.05385	-0.00100704	0.837959	0.865641	PGLYRP1	0.096504	0.165965	0.782214	0.00893856	0.0250847	MASP2	0.240196	0.332318	0.468352	0.0498786	0.124542
MAPK8IP2	0.753421	1.16273	0.625989	0.000161097	0.0027361	NFIX	3.78213	3.92109	0.0520565	0.104766	0.173671	IYD	1.17879	0.995519	-0.243788	0.4047	0.511191
MED24	3.58367	3.42354	-0.0659514	0.0568192	0.130157	ST3GAL1	3.80599	3.80144	-0.00172575	0.382403	0.468879	FAM76A	2.1222	2.21005	0.0585211	0.0634549	0.146673
HEATR5B	2.21528	2.29938	0.053758	0.230544	0.342533	MMP25	0.562254	0.783715	0.479106	0.00733062	0.0214046	TRAF3IP3	0.931091	1.19855	0.364294	0.296818	0.415257
RPS20	8.048	7.8769	-0.0310017	0.164094	0.269991	IL32	5.35704	5.04587	-0.0863335	0.238596	0.328565	POMT2	1.65775	1.82331	0.137328	0.0343244	0.0963123
CSDE1	6.163	6.30712	0.0333486	0.0797183	0.1644	PKD1	2.05529	2.44593	0.251042	6.44718e-05	0.000490602	VTA1	2.46993	2.58342	0.0648139	0.136033	0.24527
REV3L	1.15422	1.48399	0.362573	0.000507859	0.00566199	MAPK8IP2	0.753421	1.35405	0.84575	0.000939228	0.00418555	MLXIPL	2.24509	2.0844	-0.107141	0.189297	0.306515
TENM1	0.074756	0.107094	0.518616	0.154588	0.259015	MED24	3.58367	3.50972	-0.0300807	0.0474058	0.0933583	BAZ1B	3.82881	4.05062	0.081246	0.00538847	0.0267143
MASP2	0.197606	0.240196	0.281586	0.149994	0.253276	RHOBTB2	2.32694	2.52503	0.117869	0.00257664	0.0092868	RANBP9	3.65702	3.96931	0.118221	5.25435e-06	0.000181916
IYD	1.62971	1.17879	-0.46731	0.039679	0.101008	HEATR5B	2.21528	2.41468	0.124343	0.0224814	0.051968	ETV7	2.33485	2.03787	-0.196265	0.00495048	0.0252936
TRAF3IP3	0.611074	0.931091	0.607574	0.00199063	0.013527	SEC62	4.11434	4.28154	0.0574675	0.042096	0.085101	SPRTN	1.29989	1.42674	0.134339	0.0220364	0.0711662
POMT2	1.645	1.65775	0.0111385	0.863103	0.88579	RPS20	8.048	7.89543	-0.0276133	0.240813	0.330902	METTL13	3.39231	3.37803	-0.00608538	0.509411	0.598631
VTA1	2.45375	2.46993	0.00948185	0.739269	0.7854	CSDE1	6.163	6.49018	0.0746251	0.000228482	0.00134608	DYRK4	1.71925	1.7258	0.005487	0.672781	0.731722
BAZ1B	3.81772	3.82881	0.00418489	0.638957	0.702453	UBE3C	3.37692	3.50354	0.0531044	0.3587	0.446311	ZNF207	3.03018	3.21671	0.0861806	0.00147241	0.0109843
RANBP9	3.62825	3.65702	0.011396	0.487863	0.577544	REV3L	1.15422	1.70301	0.561176	1.8042e-09	1.83951e-07	UQCRC1	5.53381	5.42202	-0.0294431	0.0379728	0.103311
SPRTN	1.39528	1.29989	-0.102172	0.102674	0.195435	TENM1	0.074756	0.194129	1.37675	9.74076e-06	0.000110218	STARD3NL	2.80972	3.11259	0.147688	2.2419e-05	0.000526557
METTL13	3.49148	3.39231	-0.0415707	0.375517	0.479687	PAX7	0.0669115	0.0922333	0.463034	0.407366	0.491102	NCAPD2	3.32029	3.37943	0.0254694	0.515289	0.603194
ZNF207	3.27194	3.03018	-0.110741	0.000151043	0.00264075	MASP2	0.197606	0.332318	0.749938	0.00174416	0.00682933	IFFO1	2.01704	2.53647	0.330585	5.95465e-07	3.59194e-05
UQCRC1	5.69402	5.53381	-0.0411742	0.136838	0.237915	IYD	1.62971	0.995519	-0.711098	0.00210359	0.0079031	GIPR	1.60512	1.95642	0.285538	0.0988346	0.197712
CD9	6.20902	5.97835	-0.0546182	0.206547	0.317109	FAM76A	2.12118	2.21005	0.0592149	0.209063	0.296902	PHF7	0.961992	1.058	0.137243	0.178747	0.294482
HHATL	0.099525	0.190404	0.935933	0.0140623	0.0502461	TRAF3IP3	0.611074	1.19855	0.971868	7.76795e-05	0.000570207	SEMA3G	1.77324	2.06678	0.220992	0.0335556	0.094806
NCAPD2	3.45915	3.32029	-0.0591092	0.782024	0.819486	POMT2	1.645	1.82331	0.148467	0.0259689	0.058144	NISCH	3.54481	3.90528	0.139719	0.000347175	0.00393044
IFFO1	1.89142	2.01704	0.0927688	0.284331	0.395323	VTA1	2.45375	2.58342	0.0742957	0.0801651	0.140895	STAB1	2.81794	3.28812	0.222622	0.00149578	0.0111132
GIPR	2.07128	1.60512	-0.367845	0.00730483	0.0320537	MLXIPL	2.21017	2.0844	-0.0845256	0.355803	0.443651	FUZ	2.73538	2.68086	-0.0290456	0.198699	0.31672
PHF7	0.95738	0.961992	0.00693441	0.45819	0.551977	BAZ1B	3.81772	4.05062	0.0854309	0.00277148	0.00982709	SLC6A13	0.0452049	0.0683444	0.596344	0.168524	0.283251
SEMA3G	1.34792	1.77324	0.39565	0.000861559	0.00788662	RANBP9	3.62825	3.96931	0.129617	4.10757e-06	5.52756e-05	IDS	3.89537	4.4288	0.185155	3.95521e-06	0.000144423
NISCH	3.44246	3.54481	0.0422688	0.195253	0.305434	ETV7	2.40642	2.03787	-0.239826	0.00267244	0.00955991	PRSS3	6.48947	4.15881	-0.64193	1.38798e-10	5.06816e-08
STAB1	2.43586	2.81794	0.21021	0.00414287	0.0219519	METTL13	3.49148	3.37803	-0.0476561	0.150105	0.229545	ZNF200	1.01704	1.11439	0.131885	0.0514981	0.127389
SLC6A13	0.0259789	0.0452049	0.799135	0.0782072	0.162468	ZNF207	3.27194	3.21671	-0.0245606	0.0850696	0.147765	CD4	3.72743	4.00306	0.102922	0.131301	0.239338
IDS	3.77727	3.89537	0.0444164	0.371212	0.476167	UQCRC1	5.69402	5.42202	-0.0706173	0.000533375	0.00265806	LRRC23	1.82154	2.06888	0.183692	0.124444	0.230817
PRSS3	5.19712	6.48947	0.320389	0.0101598	0.0399759	STARD3NL	2.85901	3.11259	0.122601	0.000157127	0.00100238	BTK	1.56912	1.84671	0.234998	0.206791	0.32547
CD4	3.11903	3.72743	0.257084	0.00215808	0.0143067	CD9	6.20902	5.93192	-0.065867	0.350055	0.438257	HFE	1.76193	1.84203	0.0641402	0.152323	0.264389
LRRC23	2.1052	1.82154	-0.208803	0.0249918	0.0742239	HHATL	0.099525	0.2861	1.52339	0.0228717	0.0527045	SCMH1	3.39419	3.45677	0.0263546	0.652906	0.715906
BTK	1.14688	1.56912	0.452247	0.00337621	0.0192231	IFFO1	1.89142	2.53647	0.423353	1.06156e-08	6.20686e-07	FYN	2.69403	3.21202	0.253716	6.80885e-06	0.000219373
HFE	1.9338	1.76193	-0.134282	0.12657	0.225749	GIPR	2.07128	1.95642	-0.0823069	0.223481	0.312573	HIVEP2	2.50597	2.8336	0.177267	0.000986982	0.00827602
SCMH1	3.27242	3.39419	0.0527086	0.16901	0.275951	PHF7	0.95738	1.058	0.144177	0.0499405	0.0973794	FMO1	1.38057	1.53445	0.15246	0.205154	0.323917
FYN	2.49524	2.69403	0.110589	0.0215807	0.0671089	SEMA3G	1.34792	2.06678	0.616642	1.16505e-05	0.000126578	TCEB3	3.33426	3.43077	0.0411657	0.108522	0.210629
HIVEP2	2.329	2.50597	0.105657	0.0853881	0.172305	NISCH	3.44246	3.90528	0.181988	9.49367e-06	0.00010802	LYPLA2	5.14777	5.10566	-0.0118509	0.223688	0.342689
FMO1	0.859356	1.38057	0.683938	0.000259182	0.00371383	STAB1	2.43586	3.28812	0.432832	1.46913e-08	7.82355e-07	CLCN6	1.84695	2.17287	0.234454	1.02029e-05	0.000289851
TCEB3	3.15427	3.33426	0.0800641	0.00435774	0.0227582	FUZ	2.74577	2.68086	-0.0345164	0.314137	0.404404	MRC2	4.25821	4.91455	0.206812	9.37575e-06	0.000273194
LYPLA2	5.40717	5.14777	-0.0709252	0.102674	0.195435	SLC6A13	0.0259789	0.0683444	1.39548	0.000715745	0.00336828	NME2	0.654376	0.58645	-0.158112	0.607496	0.679751
CLCN6	1.81555	1.84695	0.0247383	0.49798	0.585824	IDS	3.77727	4.4288	0.229572	2.85579e-07	7.00499e-06	SLC6A7	0.111134	0.151869	0.450534	0.524171	0.610981
MRC2	4.05264	4.25821	0.0713878	0.221323	0.332687	PRSS3	5.19712	4.15881	-0.32154	0.000218732	0.00129987	TSPAN9	3.79449	4.01795	0.0825552	0.0125886	0.0484475
NME2	0.610473	0.654376	0.100192	0.958426	0.966272	ZNF200	1.03314	1.11439	0.109218	0.0338962	0.0718927	BTBD7	2.11254	2.19167	0.0530518	0.463676	0.561794
SLC6A7	0.231634	0.111134	-1.05955	0.318055	0.427293	CD4	3.11903	4.00306	0.360006	8.13231e-06	9.52537e-05	APBA3	1.86591	1.97157	0.0794693	0.221955	0.340854
TSPAN9	3.54715	3.79449	0.0972433	0.0428678	0.106772	LRRC23	2.1052	2.06888	-0.025111	0.261419	0.352239	MKS1	1.90834	2.01693	0.0798472	0.21512	0.333764
BTBD7	2.02296	2.11254	0.0625128	0.42025	0.518789	BTK	1.14688	1.84671	0.687245	4.74362e-05	0.000387303	ABHD5	2.26087	2.40475	0.0890114	0.0363125	0.100265
APBA3	2.00832	1.86591	-0.106113	0.17917	0.287669	SCMH1	3.27242	3.45677	0.0790633	0.0582353	0.109867	KAL1	1.0565	1.41399	0.420476	0.00108764	0.00887813
MKS1	2.00511	1.90834	-0.0713625	0.156924	0.261737	FYN	2.49524	3.21202	0.364305	4.02657e-10	7.33321e-08	AKAP8L	3.17118	3.33101	0.0709385	0.0328016	0.0931466
AKAP8L	3.49338	3.17118	-0.139604	0.000243452	0.00356332	HIVEP2	2.329	2.8336	0.282924	3.40645e-07	8.07234e-06	MBTD1	1.84054	1.83843	-0.00165915	0.768381	0.810058
UTP18	3.6884	3.53255	-0.0622824	0.0249918	0.0742239	FMO1	0.859356	1.53445	0.836398	1.01502e-06	1.86054e-05	UTP18	3.53255	3.65364	0.0486232	0.0343244	0.0963123
RNF216	2.72677	2.81827	0.0476162	0.159287	0.264605	TCEB3	3.15427	3.43077	0.12123	6.44718e-05	0.000490602	RNF216	2.81827	3.16721	0.168404	4.68266e-08	4.83922e-06
PTBP1	5.30795	5.07578	-0.0645233	0.00274094	0.0167415	LYPLA2	5.40717	5.10566	-0.0827761	0.000784978	0.00362502	DPF1	0.133507	0.188763	0.499664	0.00237737	0.0152582
DPF1	0.121457	0.133507	0.136462	0.733223	0.780816	CLCN6	1.81555	2.17287	0.259192	1.39144e-05	0.000145865	SYT7	2.35572	2.8501	0.274844	0.195528	0.313306
SYT7	1.84811	2.35572	0.350118	0.00766277	0.0330893	MRC2	4.05264	4.91455	0.2782	1.88468e-07	5.11811e-06	LARS2	2.14079	2.24947	0.0714443	0.0915925	0.187835
LARS2	2.04219	2.14079	0.0680242	0.120703	0.218704	TSPAN9	3.54715	4.01795	0.179799	1.3228e-05	0.00014052	PIK3C2A	2.60486	2.78783	0.0979342	0.127837	0.234994
PLAUR	4.88294	4.33301	-0.172381	0.00114587	0.00947468	BTBD7	2.02296	2.19167	0.115565	0.0505917	0.0984186	PLAUR	4.33301	4.58289	0.0808893	0.029929	0.0877929
ANLN	2.52503	2.03734	-0.309615	0.0061672	0.0285731	ABHD5	2.24242	2.40475	0.100831	0.0199918	0.0473907	ANLN	2.03734	2.28035	0.162573	0.208438	0.326897
RABGAP1	2.86461	2.8033	-0.0312135	0.769735	0.809948	KAL1	1.10561	1.41399	0.35493	0.00331885	0.0113467	WIZ	2.88906	3.00053	0.0546206	0.137236	0.246627
DCN	4.90939	5.45274	0.151437	0.0122042	0.0453639	AKAP8L	3.49338	3.33101	-0.0686657	0.0404418	0.0825549	RABGAP1	2.8033	2.99886	0.0972891	0.015624	0.056263
QPCTL	2.95664	2.49901	-0.242599	1.56983e-05	0.000615516	MBTD1	1.86006	1.83843	-0.0168777	0.562221	0.627709	DCN	5.45274	5.97728	0.132507	0.00166917	0.0119979
PPP5C	3.34767	3.21411	-0.0587374	0.284331	0.395323	UTP18	3.6884	3.65364	-0.0136592	0.41652	0.49928	QPCTL	2.49901	2.60814	0.0616639	0.187762	0.304986
CEP68	1.73207	2.04599	0.240298	1.51378e-05	0.000601979	RNF216	2.72677	3.16721	0.21602	3.10806e-09	2.65809e-07	PPP5C	3.21411	3.36194	0.064871	0.412468	0.517802
MAP4K3	2.81713	2.55423	-0.141342	0.00748188	0.0325293	PTBP1	5.30795	5.13715	-0.047186	0.000398534	0.00209659	CEP68	2.04599	2.14021	0.0649553	0.241549	0.36075
ZBTB32	0.274032	0.317245	0.211252	0.215324	0.326567	DPF1	0.121457	0.188763	0.636126	0.0016169	0.00642144	MAP4K3	2.55423	2.75113	0.107137	0.0331768	0.0939683
TYROBP	5.3327	5.89888	0.145575	0.0146052	0.0514688	SYT7	1.84811	2.8501	0.624962	0.000709795	0.00334247	ZBTB32	0.317245	0.44373	0.484085	0.195528	0.313306
TMEM159	4.52885	3.95808	-0.194344	1.51378e-05	0.000601979	LARS2	2.04219	2.24947	0.139469	0.00164789	0.006521	TYROBP	5.89888	6.03114	0.0319899	0.659504	0.721293
GABRA3	0.0200925	0.0972097	2.27445	0.0140257	0.0501217	PIK3C2A	2.63126	2.78783	0.0833854	0.145449	0.224098	TMEM159	3.95808	4.02251	0.0232968	0.594786	0.669798
BRCA1	1.12176	1.04053	-0.108437	0.366937	0.472222	PLAUR	4.88294	4.58289	-0.0914921	0.263782	0.354672	BRCA1	1.04053	1.11645	0.101594	0.106527	0.207802
ERCC1	3.3757	3.22546	-0.0656834	0.120703	0.218704	ANLN	2.52503	2.28035	-0.147042	0.0989627	0.16599	ERCC1	3.22546	3.35519	0.0568905	0.132472	0.240847
CD22	0.874618	1.0804	0.304835	0.0960914	0.187057	WIZ	2.97237	3.00053	0.0136034	0.671376	0.720652	CD22	1.0804	1.54138	0.51266	0.237899	0.356914
SEMA3B	4.10356	3.64682	-0.170238	0.026591	0.0772179	RABGAP1	2.86461	2.99886	0.0660756	0.137935	0.215007	SEMA3B	3.64682	3.40733	-0.0979996	0.205154	0.323917
PRICKLE3	2.43851	2.09079	-0.221952	0.000625203	0.00644001	DCN	4.90939	5.97728	0.283945	2.85579e-07	7.00499e-06	MBTPS2	1.67258	1.91932	0.198522	0.00107023	0.00877
LTF	3.33622	4.04262	0.277079	0.0898509	0.17859	QPCTL	2.95664	2.60814	-0.180935	0.0003025	0.00168252	PRICKLE3	2.09079	2.12918	0.0262503	0.744081	0.790282
EXTL3	2.08571	2.29014	0.134897	0.0146052	0.0514688	CEP68	1.73207	2.14021	0.305254	2.37849e-08	1.12634e-06	LTF	4.04262	3.06113	-0.401228	0.00217	0.0143649
NR1H4	1.01124	1.33369	0.399306	0.0220417	0.0681258	MAP4K3	2.81713	2.75113	-0.034205	0.215158	0.303434	EXTL3	2.29014	2.44038	0.0916709	0.0745964	0.163258
ELOVL5	3.91162	4.0044	0.033819	0.227441	0.339365	ZBTB32	0.274032	0.44373	0.695337	0.0159661	0.0397556	NR1H4	1.33369	0.9056	-0.558482	0.000372232	0.00412376
ALOX5	4.79736	4.39657	-0.125864	0.0122042	0.0453639	TYROBP	5.3327	6.03114	0.177565	0.00188057	0.00725048	ELOVL5	4.0044	4.58485	0.195292	5.28927e-07	3.28462e-05
KDM5D	1.35767	1.08195	-0.327497	0.111654	0.207453	TMEM159	4.52885	4.02251	-0.171047	4.21e-05	0.000352371	ALOX5	4.39657	4.36522	-0.0103247	0.620327	0.690159
CALCOCO1	3.28701	3.39075	0.0448295	0.240035	0.351829	GABRA3	0.0200925	0.0739248	1.8794	0.000215867	0.00128819	KDM5D	1.08195	1.25152	0.210046	0.159804	0.273849
UBR7	3.25036	3.31784	0.029644	0.280739	0.391907	ERCC1	3.3757	3.35519	-0.00879293	0.805069	0.834578	CALCOCO1	3.39075	3.60665	0.0890543	0.0799498	0.170922
EHD3	1.72807	2.03234	0.233981	0.00559126	0.0268527	CD22	0.874618	1.54138	0.817495	0.00757728	0.0219993	UBR7	3.31784	3.47409	0.0663909	0.0212543	0.0693931
PSMC4	5.35602	5.09062	-0.0733223	0.0185823	0.0606026	SEMA3B	4.10356	3.40733	-0.268237	0.000939228	0.00418555	MAP4K5	2.72207	3.16919	0.21941	2.20158e-08	2.69162e-06
SLC7A14	0.0906271	0.220289	1.28138	5.75324e-06	0.000310497	MBTPS2	1.6651	1.91932	0.204989	0.00126001	0.0052738	EHD3	2.03234	2.52602	0.313727	3.87768e-07	2.55275e-05
CLDN11	1.20816	1.50222	0.314289	0.0944996	0.184692	PRICKLE3	2.43851	2.12918	-0.195702	5.73286e-05	0.00044766	PSMC4	5.09062	5.31962	0.0634841	0.110547	0.21332
SLC25A39	5.58	5.24712	-0.0887374	0.000387057	0.00475695	LTF	3.33622	3.06113	-0.124149	0.426128	0.50789	MAN2B2	3.19207	3.43436	0.105548	0.000109059	0.00165559
MVP	6.50491	6.10599	-0.0913041	0.000411315	0.00494995	EXTL3	2.08571	2.44038	0.226568	1.65944e-05	0.00016764	SLC7A14	0.220289	0.527061	1.25857	0.248026	0.367405
PGM3	2.48443	2.49085	0.00372253	0.650464	0.712275	NR1H4	1.01124	0.9056	-0.159176	0.288218	0.379043	CLDN11	1.50222	1.85373	0.303339	0.0113503	0.0449059
RWDD2A	1.3962	1.58136	0.179661	0.00545508	0.0264476	ELOVL5	3.91162	4.58485	0.229111	5.87018e-09	3.98533e-07	SLC25A39	5.24712	5.15167	-0.0264867	0.374517	0.485217
CLK1	4.23698	3.92879	-0.108952	0.0374216	0.0969653	ALOX5	4.79736	4.36522	-0.136189	0.0259689	0.058144	MVP	6.10599	5.97026	-0.0324302	0.0951584	0.192938
POLR3B	1.49761	1.66374	0.151767	0.00784757	0.0336019	KDM5D	1.35767	1.25152	-0.117451	0.751798	0.789554	PGM3	2.49085	2.68015	0.105673	0.00144938	0.0108687
ANGEL1	2.22289	2.53881	0.191715	0.000235927	0.00350456	CALCOCO1	3.28701	3.60665	0.133884	0.00206484	0.00778894	RWDD2A	1.58136	1.65174	0.0628219	0.193956	0.311608
RNF14	3.27896	3.16859	-0.049399	0.115052	0.211869	UBR7	3.25036	3.47409	0.096035	0.00188057	0.00725048	CLK1	3.92879	4.33911	0.143315	0.00142668	0.0107545
DNASE1L1	2.88513	2.60881	-0.145244	0.00304349	0.0179011	MAP4K5	2.78626	3.16919	0.185782	6.91539e-05	0.00052111	POLR3B	1.66374	1.60767	-0.0494587	0.107521	0.209175
DDX11	2.00989	1.6719	-0.26563	0.0215807	0.0671089	EHD3	1.72807	2.52602	0.547707	9.92517e-12	8.61685e-09	ANGEL1	2.53881	2.65702	0.0656586	0.652906	0.715906
HEBP1	3.4044	3.60529	0.0827148	0.0374216	0.0969653	PSMC4	5.35602	5.31962	-0.00983816	0.199186	0.285877	RNF14	3.16859	3.37568	0.0913395	0.00387876	0.0213472
GPRC5A	6.43576	5.60119	-0.200379	0.00128216	0.0101599	MAN2B2	3.20191	3.43436	0.101109	0.000695585	0.00328908	DNASE1L1	2.60881	2.80415	0.10417	0.0647676	0.148417
MAMLD1	0.996965	1.1809	0.24427	0.0177955	0.0589025	SLC7A14	0.0906271	0.527061	2.53996	4.81379e-06	6.23384e-05	DDX11	1.6719	1.81636	0.119565	0.237899	0.356914
CD6	1.14096	1.48747	0.382617	0.00545508	0.0264476	CLDN11	1.20816	1.85373	0.617628	9.74076e-06	0.000110218	HEBP1	3.60529	3.432	-0.0710646	0.0195227	0.0654164
TACC3	2.96198	2.63846	-0.166867	0.00862732	0.0357735	SLC25A39	5.58	5.15167	-0.115224	8.81349e-07	1.66781e-05	MAMLD1	1.1809	1.51367	0.358162	0.000880476	0.00764028
UFL1	2.93968	2.98065	0.0199705	0.50308	0.590036	MVP	6.50491	5.97026	-0.123734	5.74196e-08	2.15323e-06	CD6	1.48747	1.6144	0.118142	0.799958	0.835596
POLA2	1.9503	1.80364	-0.112784	0.0547647	0.12681	NUB1	4.07963	4.07592	-0.00131297	0.592526	0.653622	TACC3	2.63846	2.71059	0.0389085	0.428266	0.532006
ZC3H3	3.2532	3.00622	-0.113908	0.0944996	0.184692	PGM3	2.48443	2.68015	0.109395	0.00907164	0.0253786	UFL1	2.98065	3.16925	0.0885151	0.0933618	0.190324
CAPN1	5.48749	5.20334	-0.0767095	0.00559126	0.0268527	RWDD2A	1.3962	1.65174	0.242483	0.000102373	0.000709822	POLA2	1.80364	1.88187	0.0612554	0.521203	0.608425
ACPP	0.983387	1.02085	0.0539423	0.42025	0.518789	CLK1	4.23698	4.33911	0.0343637	0.449041	0.52899	CAPN1	5.20334	5.16515	-0.0106282	0.376978	0.487345
MDH1	4.36534	4.24847	-0.0391504	0.256459	0.368313	POLR3B	1.49761	1.60767	0.102309	0.0367952	0.0766233	ACPP	1.02085	1.06428	0.0601103	0.954488	0.962678
SLC30A9	3.31829	3.24044	-0.0342483	0.350147	0.457053	ANGEL1	2.22289	2.65702	0.257374	1.42016e-06	2.42477e-05	MDH1	4.24847	4.39797	0.0498948	0.203526	0.322183
MTMR11	4.88024	3.78303	-0.36741	4.57679e-06	0.000260588	RNF14	3.27896	3.37568	0.0419405	0.270958	0.362044	SLC30A9	3.24044	3.3402	0.0437434	0.154956	0.267737
COX15	3.47766	3.26981	-0.088912	0.016309	0.0553118	DNASE1L1	2.88513	2.80415	-0.0410739	0.04266	0.0859923	MTMR11	3.78303	3.86532	0.0310478	0.778867	0.818624
CCDC88C	2.02396	1.93809	-0.062546	0.259836	0.371558	DDX11	2.00989	1.81636	-0.146065	0.133572	0.209989	COX15	3.26981	3.22316	-0.0207308	0.203526	0.322183
ZMYND11	3.74899	3.877	0.0484402	0.102674	0.195435	HEBP1	3.4044	3.432	0.0116502	0.500422	0.574564	CCDC88C	1.93809	1.96586	0.0205236	0.669452	0.729202
WAS	2.23015	2.74593	0.300153	0.0028886	0.0173254	GPRC5A	6.43576	5.35381	-0.265544	0.00128463	0.00535108	YAF2	1.08056	1.26322	0.22533	0.000146784	0.00206251
DPEP1	2.52457	4.03819	0.67767	1.17677e-07	1.93516e-05	MAMLD1	0.996965	1.51367	0.602433	1.42016e-06	2.42477e-05	ZMYND11	3.877	4.04463	0.0610688	0.239719	0.358878
BID	3.18574	2.95778	-0.107114	0.0332333	0.0895059	CD6	1.14096	1.6144	0.500759	0.0048847	0.0155238	WAS	2.74593	3.0244	0.139355	0.301066	0.419422
MATR3	0.56158	0.453398	-0.308712	0.0220417	0.0681258	TACC3	2.96198	2.71059	-0.127958	0.0224814	0.051968	DPEP1	4.03819	2.75827	-0.549944	9.79157e-08	8.8499e-06
NPC1L1	3.08392	2.52456	-0.288735	0.017038	0.0571395	UFL1	2.93968	3.16925	0.108486	0.0231444	0.0531788	BID	2.95778	3.13046	0.0818591	0.0661026	0.150331
XYLT2	3.19181	2.98964	-0.0944067	0.0159549	0.0545676	POLA2	1.9503	1.88187	-0.0515281	0.0881269	0.151778	MATR3	0.453398	0.606734	0.420286	5.38093e-05	0.000994346
STMN4	0.074912	0.216498	1.53109	0.000234307	0.00350456	ZC3H3	3.2532	3.04698	-0.094476	0.0290867	0.0637009	XYLT2	2.98964	3.15703	0.0785997	0.0176958	0.0611271
NUDCD3	3.61382	3.46966	-0.0587273	0.341937	0.449612	CAPN1	5.48749	5.16515	-0.0873377	0.000233509	0.00137034	RGPD5	0.00115587	0.00184627	0.675628	0.0793834	0.170242
ISL1	1.40933	1.50393	0.0937328	0.492908	0.581398	ACPP	0.983387	1.06428	0.114053	0.51106	0.583831	NUDCD3	3.46966	3.58704	0.0479997	0.338804	0.453272
CHDH	2.32342	2.48747	0.098433	0.083941	0.170344	MDH1	4.36534	4.39797	0.0107444	0.913881	0.928497	ISL1	1.50393	1.88823	0.328299	0.200298	0.318713
CLCA4	0.14789	0.224671	0.603289	0.633222	0.698085	MTMR11	4.88024	3.86532	-0.336362	2.25372e-07	5.81704e-06	CHDH	2.48747	2.04072	-0.285604	1.48674e-05	0.000383388
GLT8D1	3.76182	3.78418	0.00854858	0.467967	0.560038	COX15	3.47766	3.22316	-0.109643	0.000143701	0.000935265	IL20RA	2.54366	2.26013	-0.170499	0.0174783	0.0605745
ATP2C1	3.88295	3.76385	-0.0449417	0.227441	0.339365	CCDC88C	2.02396	1.96586	-0.0420223	0.465827	0.544222	CLCA1	1.09823	0.501074	-1.13208	0.121009	0.226635
IGF1	0.152439	0.452072	1.56832	3.56194e-05	0.00106273	YAF2	1.09574	1.26322	0.205202	0.000358645	0.00192852	GLT8D1	3.78418	4.0625	0.10239	4.08966e-05	0.000805752
RALBP1	4.22997	3.94961	-0.0989367	0.0277055	0.0793013	ZMYND11	3.74899	4.04463	0.109509	0.00382575	0.012748	ATP2C1	3.76385	3.97323	0.0781003	0.0363125	0.100265
RUFY3	1.98083	1.88427	-0.0720995	0.270149	0.381582	WAS	2.23015	3.0244	0.439508	6.2979e-05	0.000481673	IGF1	0.452072	0.760186	0.749801	0.0365164	0.100759
CNTN1	1.47091	1.86856	0.345214	0.0229895	0.0701708	DPEP1	2.52457	2.75827	0.127726	0.338736	0.428089	SLC38A5	3.65466	2.83951	-0.364093	0.000450128	0.00474306
SLC11A1	1.99799	1.8155	-0.138186	0.35848	0.464525	BID	3.18574	3.13046	-0.0252548	0.439137	0.5195	RALBP1	3.94961	4.1449	0.0696247	0.0674602	0.152481
WWTR1	3.3906	3.55362	0.0677502	0.375517	0.479687	MATR3	0.56158	0.606734	0.111574	0.171606	0.255048	RUFY3	1.88427	2.36094	0.325352	7.41664e-08	7.07707e-06
AGPS	2.89371	2.81686	-0.0388337	0.325891	0.434708	NPC1L1	3.08392	2.52039	-0.291122	0.00733062	0.0214046	CNTN1	1.86856	2.4092	0.366631	0.00410999	0.0222048
CXorf56	3.19829	3.07833	-0.0551559	0.375517	0.479687	XYLT2	3.19181	3.15703	-0.015807	0.61184	0.670128	SLC11A1	1.8155	2.25228	0.311023	0.00531313	0.0265037
ATP1A2	0.37708	0.508337	0.430916	0.0282778	0.0804205	RGPD5	0.000914949	0.00184627	1.01285	0.0150698	0.0380096	WWTR1	3.55362	3.79204	0.0936828	0.00673255	0.0313995
TTC27	2.67452	2.59131	-0.0455997	0.346026	0.453241	STMN4	0.074912	0.306488	2.03256	0.000705562	0.00333405	AGPS	2.81686	2.92294	0.053332	0.0864459	0.18036
ZNF582	0.502794	0.706511	0.490745	0.000539099	0.00586194	ISL1	1.40933	1.88823	0.422032	0.070182	0.127011	CXorf56	3.07833	3.18829	0.0506361	0.38442	0.494004
VSIG2	6.38808	5.22355	-0.290351	0.000492879	0.00554484	CHDH	2.32342	2.04072	-0.187171	0.00907164	0.0253786	ATP1A2	0.508337	0.810612	0.673226	0.126698	0.233608
PHLDB1	2.28101	2.50553	0.135438	0.0913796	0.180589	IL20RA	2.53501	2.26013	-0.165587	0.0612427	0.114254	TTC27	2.59131	2.6396	0.0266391	0.399572	0.507074
MARCO	2.74122	2.98251	0.121705	0.45819	0.551977	CLCA1	1.2563	0.501074	-1.32608	0.388251	0.474174	ZNF582	0.706511	0.803173	0.184998	0.190841	0.308249
PRDM11	0.77126	0.846476	0.13425	0.00803634	0.0341227	CLCA4	0.14789	0.193814	0.390146	0.631415	0.686672	VSIG2	5.22355	4.8164	-0.117075	0.239719	0.358878
SYT13	4.42536	3.90567	-0.180225	0.0152669	0.0529662	GLT8D1	3.76182	4.0625	0.110939	2.0901e-06	3.274e-05	PHLDB1	2.50553	2.80905	0.164968	0.00156795	0.0114718
SNAI2	2.88384	3.19996	0.150065	0.134734	0.235459	ATP2C1	3.88295	3.97323	0.0331586	0.397693	0.482793	MARCO	2.98251	3.07065	0.0420172	0.771872	0.813113
CD74	9.00934	9.52309	0.0800082	0.00139403	0.0107035	IGF1	0.152439	0.760186	2.31812	1.27459e-07	3.81577e-06	PRDM11	0.846476	0.953223	0.171346	0.0457677	0.117469
HGF	0.607334	1.0231	0.752392	0.000387057	0.00475695	SLC38A5	3.50689	2.83951	-0.304548	0.0136956	0.035305	SNAI2	3.19996	3.70529	0.21153	0.00293364	0.0176651
ZRANB1	1.68853	1.76366	0.0628033	0.198033	0.30827	RALBP1	4.22997	4.1449	-0.029312	0.189654	0.275523	CD74	9.52309	9.32989	-0.0295686	0.379448	0.489361
NCDN	2.71932	2.76246	0.0227088	0.544851	0.624999	RUFY3	1.98083	2.36094	0.253253	1.07919e-05	0.000119609	HGF	1.0231	1.13608	0.151105	0.272174	0.391286
GPR124	2.66675	3.21245	0.268588	0.00183517	0.0128292	CNTN1	1.47091	2.4092	0.711844	6.60493e-06	8.03529e-05	ZRANB1	1.76366	1.99085	0.174813	0.00264216	0.0164003
ZFP64	1.82152	1.77891	-0.0341489	0.599377	0.670087	SLC11A1	1.99799	2.25228	0.172836	0.187788	0.273339	NCDN	2.76246	3.05699	0.14616	2.38272e-05	0.000549732
MNAT1	2.21795	2.01486	-0.138547	0.00414287	0.0219519	WWTR1	3.3906	3.79204	0.161433	0.000579083	0.00283748	GPR124	3.21245	3.72812	0.214775	0.000895009	0.00773209
RUNX3	1.75082	1.98777	0.18312	0.171508	0.278826	ATP1A2	0.37708	0.810612	1.10414	0.00133523	0.00551531	MNAT1	2.01486	2.19108	0.120965	0.0116493	0.045778
MRE11A	1.92909	1.86655	-0.0475423	0.401993	0.503612	TTC27	2.67452	2.6396	-0.0189607	0.805069	0.834578	SAMD4A	1.42389	1.9584	0.459834	2.10764e-10	7.20579e-08
PLEKHB1	3.18359	2.96036	-0.104882	0.42025	0.518789	ZNF582	0.502794	0.803173	0.675743	8.34544e-06	9.71544e-05	RUNX3	1.98777	2.37913	0.259282	0.0272753	0.082653
SERPINB1	6.59719	6.15244	-0.100693	0.00573051	0.0272824	VSIG2	6.38808	4.8164	-0.407426	1.27459e-07	3.81577e-06	MRE11A	1.86655	2.02022	0.114137	0.0254206	0.0788324
SPAST	2.33596	2.27135	-0.0404638	0.610573	0.678964	PHLDB1	2.28101	2.80905	0.300406	7.52368e-06	8.98139e-05	PLEKHB1	2.96036	2.72424	-0.11992	0.0282456	0.0845762
NRXN3	0.201885	0.309757	0.617608	0.00155721	0.0115657	MARCO	2.74122	3.07065	0.163723	0.422911	0.505166	SERPINB1	6.15244	5.81412	-0.081599	0.00474379	0.0245351
OSBPL5	2.72644	2.49494	-0.128013	0.0220417	0.0681258	PRDM11	0.77126	0.953223	0.305596	0.00061573	0.00298085	SLC7A9	0.539105	0.374322	-0.526285	0.280228	0.399288
AQR	2.09818	2.10591	0.00530696	0.837959	0.865641	SYT13	4.42536	3.70442	-0.256549	0.00146986	0.00595973	SPAST	2.27135	2.46523	0.118172	0.0100874	0.041542
FHL1	2.13912	2.61155	0.287886	0.00587287	0.0277334	SNAI2	2.88384	3.70529	0.361596	5.46868e-05	0.000432333	NRXN3	0.309757	0.424405	0.454304	0.136033	0.24527
RTFDC1	4.62921	4.46267	-0.0528577	0.0319295	0.0870934	CD74	9.00934	9.32989	0.0504397	0.0388431	0.0799407	OSBPL5	2.49494	2.7375	0.133853	0.00546478	0.0270093
GABRA1	0.0102441	0.0160044	0.64368	0.122616	0.220957	HGF	0.607334	1.13608	0.903497	3.40645e-07	8.07234e-06	AQR	2.10591	2.15373	0.0323905	0.477717	0.5728
NLRP2	1.64294	1.57621	-0.0598228	0.964818	0.971175	ZRANB1	1.68853	1.99085	0.237616	0.000107149	0.000737757	C8B	0.294731	0.308984	0.0681318	0.48907	0.582034
SLC45A4	2.86476	2.71624	-0.0768058	0.35848	0.464525	NCDN	2.71932	3.05699	0.168869	1.35671e-05	0.000143219	FHL1	2.61155	3.37295	0.369106	7.41846e-06	0.000232984
ZNF839	1.18019	1.13328	-0.0585191	0.662055	0.722025	GPR124	2.66675	3.72812	0.483364	9.14944e-11	3.04804e-08	RTFDC1	4.46267	4.62372	0.0511456	0.0424084	0.11147
ZDHHC6	3.7187	3.47228	-0.0989147	0.00435774	0.0227582	ZFP64	1.82152	1.79365	-0.022242	0.68355	0.730954	GABRA1	0.0160044	0.0394784	1.30259	0.020656	0.0681547
RNH1	4.58634	4.42862	-0.0504877	0.215324	0.326567	MNAT1	2.21795	2.19108	-0.0175819	0.514632	0.587348	NLRP2	1.57621	1.21887	-0.370907	0.029929	0.0877929
NDUFS1	2.90374	2.80548	-0.0496675	0.215324	0.326567	SAMD4A	1.39159	1.9584	0.492939	1.78282e-08	9.05636e-07	SLC45A4	2.71624	2.47399	-0.134772	0.0139451	0.0519311
RB1CC1	2.71745	2.82931	0.058197	0.136838	0.237915	RUNX3	1.75082	2.37913	0.442402	0.00214309	0.00802502	RNF10	4.71531	4.82661	0.0336589	0.21512	0.333764
ERP44	4.21907	4.20315	-0.00545219	0.697306	0.751818	MRE11A	1.92909	2.02022	0.0665946	0.254419	0.344834	ZNF839	1.13328	1.25705	0.149538	0.0335556	0.094806
ALAS1	4.75679	4.50246	-0.0792753	0.0374216	0.0969653	PLEKHB1	3.18359	2.72424	-0.224802	0.0159661	0.0397556	GRAMD1B	2.14292	1.96863	-0.122385	0.128984	0.236388
BIRC3	3.96089	3.78215	-0.066618	0.246514	0.358058	SERPINB1	6.59719	5.81412	-0.182292	1.52771e-07	4.40776e-06	RNH1	4.42862	4.50198	0.0237048	0.566641	0.646288
AKAP11	2.79444	2.64061	-0.0816892	0.20368	0.314226	CYP3A43	0.0285457	0.027283	-0.065269	0.511061	0.583831	NDUFS1	2.80548	2.86869	0.0321479	0.258463	0.377468
GLRX2	3.09589	2.65743	-0.22032	2.09847e-06	0.000152773	SLC7A9	0.394706	0.374322	-0.0764983	0.12246	0.195993	RB1CC1	2.82931	3.01556	0.0919759	0.052602	0.129221
SNAPC1	2.14466	1.97024	-0.122374	0.0508412	0.120696	SPAST	2.33596	2.46523	0.077708	0.062794	0.116617	ERP44	4.20315	4.12934	-0.0255595	0.237899	0.356914
DERA	3.76868	3.56259	-0.0811339	0.0557841	0.128386	NRXN3	0.201885	0.424405	1.07191	3.50767e-07	8.27149e-06	ALAS1	4.50246	4.61372	0.0352173	0.764895	0.807098
ABCC2	0.316725	0.272714	-0.215838	0.508207	0.594478	OSBPL5	2.72644	2.7375	0.00584012	0.783684	0.816397	BIRC3	3.78215	4.02644	0.0902978	0.0753428	0.164331
DEF6	3.67645	3.45581	-0.0892909	0.0462706	0.112756	AQR	2.09818	2.15373	0.0376975	0.741415	0.780221	AKAP11	2.64061	3.02896	0.197954	0.000498784	0.005095
PLEKHO1	2.66893	2.89435	0.116977	0.0692966	0.149399	FHL1	2.13912	3.37295	0.656992	5.87332e-11	2.32343e-08	GLRX2	2.65743	2.60738	-0.0274331	0.364773	0.476675
GCLM	2.14324	2.29322	0.0975846	0.0743583	0.156852	RTFDC1	4.62921	4.62372	-0.00171206	0.536333	0.605817	SNAPC1	1.97024	2.29232	0.218431	5.36966e-06	0.000184509
UBR2	2.67548	2.80155	0.0664283	0.115052	0.211869	GABRA1	0.0102441	0.0394784	1.94627	9.82715e-05	0.000687541	STRAP	5.219	5.46462	0.0663468	0.00237737	0.0152582
EHD2	5.17185	5.03688	-0.0381525	0.0255153	0.0751798	NLRP2	1.64294	1.21887	-0.43073	0.112083	0.183099	ABCC2	0.272714	0.275405	0.0141646	0.171484	0.286644
DEPDC1	0.826285	0.672311	-0.297511	0.0797183	0.1644	SLC45A4	2.86476	2.47399	-0.211578	0.0035013	0.0118516	PLEKHO1	2.89435	3.36277	0.216408	0.00136053	0.0104135
CCDC28A	3.98378	4.05603	0.0259304	0.233678	0.345847	RNF10	4.78342	4.82661	0.0129694	0.805069	0.834578	GCLM	2.29322	2.39913	0.0651343	0.433609	0.536448
RRAGD	1.74224	2.19703	0.334615	0.000353165	0.00449389	ZNF839	1.18019	1.25705	0.0910191	0.199186	0.285877	UBR2	2.80155	2.817	0.00793153	0.969043	0.974916
HSF2	1.96655	2.02073	0.0392041	0.0825137	0.16829	ZDHHC6	3.7187	3.53868	-0.0715851	0.00116579	0.00498432	EHD2	5.03688	5.29734	0.0727401	0.00423024	0.0226357
PHF20	2.48515	2.46822	-0.00986232	0.977607	0.981504	GRAMD1B	2.11387	1.96863	-0.10269	0.234206	0.323753	DEPDC1	0.672311	0.77732	0.20938	0.197109	0.314973
NR1H3	3.08629	2.86865	-0.105501	0.0756699	0.158709	RNH1	4.58634	4.50198	-0.0267829	0.407042	0.490793	CCDC28A	4.05603	4.03334	-0.00809389	0.569736	0.648819
TYMP	4.81898	4.79766	-0.00639711	0.788189	0.824248	NDUFS1	2.90374	2.86869	-0.0175195	0.482956	0.559036	RRAGD	2.19703	2.3511	0.097783	0.167233	0.281785
NCAPH2	3.76693	3.64431	-0.0477419	0.161677	0.26732	RB1CC1	2.71745	3.01556	0.150173	0.000315709	0.00174044	HSF2	2.02073	2.33263	0.20708	0.000157976	0.00217513
TOMM34	4.66304	4.37649	-0.0914963	0.00519166	0.0255885	ERP44	4.21907	4.12934	-0.0310117	0.0840697	0.14633	PHF20	2.46822	2.86922	0.217187	6.87257e-08	6.74596e-06
SEC63	3.42117	3.60923	0.0772036	0.0271433	0.0782206	ALAS1	4.75679	4.61372	-0.0440579	0.04266	0.0859923	HSD17B6	1.09301	1.56298	0.515996	0.000498784	0.005095
KPNA6	3.33298	3.3469	0.00601087	0.990402	0.992141	BIRC3	3.96089	4.02644	0.0236798	0.667336	0.717499	NR1H3	2.86865	2.89287	0.0121318	0.892857	0.911448
VIM	6.92209	7.20553	0.0578966	0.230544	0.342533	AKAP11	2.79444	3.02896	0.116265	0.0404418	0.0825549	TYMP	4.79766	4.87529	0.0231559	0.49487	0.58679
RTEL1-TNFRSF6B	0.730108	0.54782	-0.414406	0.00320592	0.018529	GLRX2	3.09589	2.60738	-0.247753	3.26715e-08	1.4097e-06	NCAPH2	3.64431	3.75894	0.0446803	0.130138	0.238026
FAS	2.73103	2.49339	-0.131333	0.20368	0.314226	SNAPC1	2.14466	2.29232	0.096057	0.139413	0.216863	TOMM34	4.37649	4.44407	0.0221068	0.415077	0.520242
RNASET2	4.09567	3.47447	-0.237307	7.31552e-05	0.00166135	DERA	3.76868	3.63165	-0.0534359	0.0782687	0.138292	KPNA6	3.3469	3.5779	0.0962892	0.000653556	0.00621037
CD44	5.1112	5.20521	0.0262949	0.715186	0.766308	STRAP	5.31242	5.46462	0.0407521	0.0274897	0.0608688	VIM	7.20553	7.82749	0.119445	5.85557e-06	0.000195324
KCNG1	0.300267	0.630698	1.0707	8.08161e-06	0.000397064	ABCC2	0.316725	0.275405	-0.201673	0.554763	0.621319	RTEL1-TNFRSF6B	0.54782	0.6584	0.265261	0.0174783	0.0605745
AGPAT4	1.30517	1.34661	0.0450883	0.782024	0.819486	DEF6	3.67645	3.41005	-0.108521	0.0132774	0.0344438	FAS	2.49339	2.76828	0.150877	0.00387876	0.0213472
SLAMF7	1.58387	1.98117	0.322898	0.0404567	0.102437	PLEKHO1	2.66893	3.36277	0.333385	8.09464e-07	1.56064e-05	RNASET2	3.47447	3.69123	0.0873116	0.227182	0.346164
BTN3A1	2.91699	3.00792	0.0442868	0.218309	0.329698	GCLM	2.14324	2.39913	0.162719	0.0057964	0.0178126	CD44	5.20521	5.27609	0.019511	0.530138	0.616028
PRKCH	1.73019	1.99477	0.205293	0.0133571	0.0484069	UBR2	2.67548	2.817	0.0743598	0.0881269	0.151778	KCNG1	0.630698	0.501914	-0.329509	0.00502116	0.0255089
INSRR	0.110505	0.149714	0.438097	0.0113984	0.0432717	EHD2	5.17185	5.29734	0.0345876	0.839584	0.864198	AGPAT4	1.34661	1.63833	0.282899	4.97716e-05	0.0009368
IFNGR1	5.13643	5.20051	0.0178889	0.528987	0.611974	DEPDC1	0.826285	0.77732	-0.0881305	0.51106	0.583831	BTN3A1	3.00792	3.15479	0.0687739	0.57284	0.651405
B4GALT7	3.14053	2.84564	-0.142254	0.000464149	0.00533981	CCDC28A	3.98378	4.03334	0.0178365	0.432604	0.513745	MIPEP	2.66721	2.6397	-0.0149583	0.316252	0.433261
SH2D2A	1.80585	1.64392	-0.135537	0.443742	0.539711	RRAGD	1.74224	2.3511	0.432398	2.69214e-07	6.70111e-06	PRKCH	1.99477	2.22221	0.155767	0.0335556	0.094806
VRK2	2.29784	2.22569	-0.0460237	0.354298	0.460857	HSF2	1.96655	2.33263	0.246284	1.48239e-07	4.30735e-06	INSRR	0.149714	0.26468	0.822046	0.0578171	0.137685
TNFRSF1B	3.80493	4.14592	0.123825	0.00545508	0.0264476	PHF20	2.48515	2.86922	0.207325	5.56628e-08	2.11504e-06	IFNGR1	5.20051	5.4642	0.0713561	0.0139451	0.0519311
VEZT	3.24016	3.0102	-0.106205	0.0174131	0.0580078	HSD17B6	1.11624	1.56298	0.485656	0.00195239	0.00745911	B4GALT7	2.84564	2.97656	0.0648943	0.100715	0.200056
POU2F2	0.67288	0.886118	0.39715	0.0035547	0.0199189	NR1H3	3.08629	2.89287	-0.0933695	0.0912723	0.155949	SH2D2A	1.64392	1.80683	0.136314	0.329662	0.445086
BRD9	2.34208	2.10802	-0.151899	0.000813206	0.00755784	NCAPH2	3.76693	3.75894	-0.00306156	0.741415	0.780221	VRK2	2.22569	2.39603	0.106393	0.0148571	0.0542935
SNX1	3.42457	3.47584	0.0214395	0.249798	0.361645	TOMM34	4.66304	4.44407	-0.0693894	0.00609838	0.0185831	TNFRSF1B	4.14592	4.33716	0.065056	0.143376	0.254126
TBPL1	1.83106	1.76689	-0.0514622	0.819208	0.850008	SEC63	3.42117	3.67784	0.104368	0.0023944	0.00876449	VEZT	3.0102	3.20548	0.0906828	0.0483021	0.121962
ARNTL2	2.79731	2.35331	-0.24935	0.00121224	0.00980032	KPNA6	3.33298	3.5779	0.1023	0.00496965	0.0157326	POU2F2	0.886118	1.12665	0.346475	0.272174	0.391286
BCLAF1	3.3187	3.35788	0.0169342	0.321957	0.430962	VIM	6.92209	7.82749	0.177342	3.50767e-07	8.27149e-06	BRD9	2.10802	2.27464	0.109749	0.0056996	0.0278681
SLC39A9	3.73896	3.6782	-0.02364	0.38422	0.48784	RTEL1-TNFRSF6B	0.730108	0.6584	-0.149146	0.300992	0.391475	SNX1	3.47584	3.66705	0.0772568	0.000880476	0.00764028
ANK1	1.02185	0.677644	-0.592579	0.0113984	0.0432717	FAS	2.73103	2.76828	0.0195435	0.507501	0.58069	TBPL1	1.76689	1.92605	0.124432	0.0141235	0.0524455
IBSP	0.798156	0.62976	-0.341869	0.477852	0.56888	RNASET2	4.09567	3.69123	-0.149996	0.00983398	0.0270855	ARNTL2	2.35331	2.5633	0.123311	0.0815354	0.17323
TFB1M	2.02769	1.91597	-0.0817583	0.243259	0.354861	CD44	5.1112	5.27609	0.0458059	0.364537	0.45173	BCLAF1	3.35788	3.55242	0.081252	0.0190511	0.0642847
RABEP1	2.83603	3.01065	0.0861987	0.0622375	0.138594	KCNG1	0.300267	0.501914	0.741193	0.0145671	0.0370318	SLC39A9	3.6782	3.78799	0.0424329	0.327402	0.44293
HMGB3	3.03283	2.91819	-0.0555901	0.528987	0.611974	AGPAT4	1.30517	1.63833	0.327987	0.000107149	0.000737757	ANK1	0.677644	0.718422	0.084304	0.582198	0.659391
BAK1	4.23328	3.93521	-0.105336	0.0239725	0.0721239	SLAMF7	1.58387	1.89462	0.258452	0.0830794	0.144977	IBSP	0.62976	0.929274	0.561303	0.248956	0.367996
MUSK	0.05677	0.127075	1.16248	0.000507754	0.00566199	BTN3A1	2.91699	3.15479	0.113061	0.0604791	0.113183	TFB1M	1.91597	1.96556	0.0368627	0.630026	0.697804
IKZF2	1.14816	1.0394	-0.143568	0.45819	0.551977	MIPEP	2.78491	2.6397	-0.0772579	0.0967145	0.163002	RABEP1	3.01065	3.23038	0.101629	0.0150456	0.0547707
FAM13B	2.05656	2.14683	0.0619717	0.116912	0.21418	PRKCH	1.73019	2.22221	0.36106	1.53905e-05	0.000157703	HMGB3	2.91819	3.02756	0.0530817	0.551286	0.633338
ARHGAP31	1.68166	2.02481	0.267902	0.00403909	0.0216233	INSRR	0.110505	0.26468	1.26014	0.000209374	0.00125703	NUP160	2.479	2.68607	0.115739	0.00751168	0.033818
CENPQ	1.62239	1.54629	-0.0693127	0.354298	0.460857	IFNGR1	5.13643	5.4642	0.089245	0.00343949	0.0116935	MUSK	0.127075	0.168423	0.406404	0.864052	0.888683
SARS	5.08503	5.17116	0.0242318	0.16901	0.275951	B4GALT7	3.14053	2.97656	-0.0773599	0.0202892	0.0479055	IKZF2	1.0394	1.21926	0.23025	0.0245349	0.0767638
RANBP3	3.23349	3.10432	-0.0588124	0.0633709	0.140269	VRK2	2.29784	2.39603	0.0603688	0.254419	0.344834	FAM13B	2.14683	2.32366	0.114193	0.15102	0.262809
ARID4A	2.07907	2.02613	-0.0372178	0.667881	0.726876	TNFRSF1B	3.80493	4.33716	0.188881	0.000254671	0.00146778	ARHGAP31	2.02481	2.33365	0.204804	0.00101953	0.00845066
TSSC1	2.51068	2.31736	-0.115597	0.00803634	0.0341227	VEZT	3.24016	3.20548	-0.0155225	0.311478	0.401704	CENPQ	1.54629	1.8217	0.236476	5.92935e-05	0.0010641
IFT88	1.79475	1.60558	-0.160685	0.00904258	0.0369091	POU2F2	0.67288	1.12665	0.743625	0.000351129	0.00189535	RANBP3	3.10432	3.23392	0.0590066	0.131301	0.239338
ALG1	2.48763	2.52841	0.0234608	0.487863	0.577544	BRD9	2.34208	2.27464	-0.0421503	0.126539	0.201173	ARID4A	2.02613	2.24932	0.150766	0.0110581	0.0441647
ZCCHC8	1.86962	1.82713	-0.0331628	0.513361	0.598954	SNX1	3.42457	3.66705	0.0986963	6.2979e-05	0.000481673	TSSC1	2.31736	2.38884	0.0438298	0.458124	0.557138
ABCF2	3.68415	3.57449	-0.043597	0.263243	0.374991	TBPL1	1.83106	1.92605	0.0729701	0.0449801	0.0895601	PNPLA6	3.39297	3.48812	0.0399002	0.45261	0.552419
CHPF2	4.56185	4.37983	-0.0587448	0.0517993	0.122203	ARNTL2	2.79731	2.5633	-0.126039	0.101253	0.168971	IFT88	1.60558	1.71879	0.098294	0.192394	0.309898
LRRC7	0.057895	0.0826012	0.512725	0.00364712	0.0202863	BCLAF1	3.3187	3.55242	0.0981862	0.00181118	0.00703599	ALG1	2.52841	2.40622	-0.0714617	0.0183625	0.0627261
FUT8	3.10184	2.84412	-0.125141	0.0260483	0.0761962	ANK1	1.02185	0.718422	-0.508275	0.0180143	0.0436679	ZCCHC8	1.82713	1.93331	0.0814895	0.0898503	0.185359
UBA6	2.47462	2.13496	-0.212998	0.000116438	0.00224647	TFB1M	2.02769	1.96556	-0.0448955	0.3587	0.446311	ABCF2	3.57449	3.73459	0.063212	0.0251224	0.0780843
GAB2	2.45204	2.61228	0.0913274	0.106097	0.200206	RABEP1	2.83603	3.23038	0.187828	1.05194e-05	0.00011695	CHPF2	4.37983	4.59563	0.0693885	0.0542948	0.132159
ATP6V0A1	3.09205	2.88362	-0.100678	0.0282778	0.0804205	HMGB3	3.03283	3.02756	-0.00250838	0.822284	0.849442	UBA6	2.13496	2.40675	0.172877	0.000552309	0.0054664
PIAS1	2.23611	2.2574	0.0136715	0.638957	0.702453	NUP160	2.48422	2.68607	0.112704	0.0103183	0.0281677	GAB2	2.61228	2.86586	0.133659	0.0135944	0.0510836
SLC4A7	1.54343	1.72484	0.160326	0.270149	0.381582	BAK1	4.23328	3.8797	-0.125831	0.00109945	0.00475369	ATP6V0A1	2.88362	3.10954	0.108817	0.0520476	0.128273
APBA2	0.995055	1.11823	0.168374	0.12459	0.223344	MUSK	0.05677	0.168423	1.56888	0.00272137	0.00969684	PIAS1	2.2574	2.43762	0.110808	0.0260263	0.0800761
MAP2K3	4.74485	4.33834	-0.12922	0.00173782	0.0123998	IKZF2	1.14816	1.21926	0.0866823	0.376389	0.46321	SLC4A7	1.72484	1.94848	0.175888	0.0272753	0.082653
EFCAB1	0.109096	0.179551	0.718792	0.0568192	0.130157	FAM13B	2.05656	2.32366	0.176164	0.0109971	0.029617	APBA2	1.11823	1.41994	0.344612	0.00210464	0.0140752
TMSB10	11.6568	11.0918	-0.0716784	0.000302776	0.00407923	ARHGAP31	1.68166	2.33365	0.472706	2.78867e-08	1.2582e-06	MAP2K3	4.33834	4.40746	0.0228038	0.604307	0.677262
ASTE1	1.69057	1.73537	0.0377284	0.249798	0.361645	CENPQ	1.62239	1.8217	0.167163	0.0154872	0.0388093	EFCAB1	0.179551	0.17395	-0.0457262	0.500659	0.591351
RNF19A	3.40398	3.43953	0.0149904	0.616205	0.684003	SARS	5.08503	5.2212	0.0381248	0.0329743	0.0703017	TMSB10	11.0918	11.1889	0.0125708	0.247098	0.366182
PEX3	2.26103	2.40485	0.0889636	0.0717909	0.153042	ARID4A	2.07907	2.24932	0.113548	0.076409	0.135709	ASTE1	1.73537	1.80821	0.0593199	0.325152	0.440997
GABARAPL2	4.84289	4.65891	-0.0558732	0.0202476	0.0642791	TSSC1	2.51068	2.38884	-0.0717676	0.0367952	0.0766233	RNF19A	3.43953	3.7704	0.132504	0.000335247	0.00382226
MYOC	0.0554858	0.129528	1.22307	0.000796411	0.00748637	PNPLA6	3.47232	3.48812	0.0065515	0.728878	0.769544	PEX3	2.40485	2.53384	0.0753836	0.161689	0.275546
FAM136A	3.87261	3.69582	-0.0674131	0.0136599	0.0491097	IFT88	1.79475	1.71879	-0.0623909	0.119798	0.192723	GABARAPL2	4.65891	4.89584	0.0715612	0.00335148	0.0193636
VCL	4.5544	4.35595	-0.0642763	0.0868554	0.174309	ALG1	2.48763	2.40622	-0.0480009	0.118484	0.191071	MYOC	0.129528	0.233964	0.853029	0.259714	0.379112
DEPDC1B	1.47487	1.05832	-0.47881	0.00312374	0.0181932	ABCF2	3.68415	3.73459	0.019615	0.472638	0.550093	SH3YL1	3.04983	2.5869	-0.237506	1.31518e-06	6.28579e-05
DAPK2	0.749731	0.793499	0.0818552	0.448529	0.543806	LRRC7	0.057895	0.131915	1.18809	0.00721002	0.0211278	FAM136A	3.69582	3.59321	-0.040618	0.0584222	0.138728
NSMAF	2.49059	2.50801	0.0100584	0.463064	0.556051	FUT8	3.10184	2.88927	-0.10242	0.0224814	0.051968	VCL	4.35595	4.69896	0.109355	0.000105046	0.00161074
ADSS	4.41423	4.02536	-0.133041	6.83886e-05	0.00158925	UBA6	2.47462	2.40675	-0.0401213	0.086079	0.149058	NSMAF	2.50801	2.6829	0.097246	0.0100874	0.041542
STAP1	0.47623	0.660917	0.47281	0.0319295	0.0870934	GAB2	2.45204	2.86586	0.224986	4.11035e-05	0.000345646	ADSS	4.02536	4.16482	0.0491333	0.0578171	0.137685
TIMP2	6.23902	6.40273	0.0373682	0.128574	0.228188	PIAS1	2.23611	2.43762	0.124479	0.0101546	0.0278187	STAP1	0.660917	1.0315	0.642209	0.12003	0.225177
RFC1	2.8405	3.0091	0.0831852	0.0146052	0.0514688	SLC4A7	1.54343	1.94848	0.336214	0.000223557	0.00132087	TIMP2	6.40273	7.06308	0.141611	3.31535e-06	0.000127163
TBC1D23	2.82437	2.83908	0.00749703	0.679593	0.736898	APBA2	0.995055	1.41994	0.512986	0.000140518	0.000919559	TBC1D23	2.83908	3.02919	0.0935083	0.00245043	0.0155774
CUL3	2.65323	2.56292	-0.0499619	0.215324	0.326567	MAP2K3	4.74485	4.40746	-0.106416	0.00121205	0.00512475	CUL3	2.56292	2.66161	0.0545114	0.110547	0.21332
MYOM2	0.458673	0.463477	0.0150331	0.424889	0.522693	EFCAB1	0.109096	0.17395	0.673066	0.163916	0.246093	OTC	0.863368	0.387891	-1.15433	2.01258e-05	0.000485947
OTC	0.800019	0.863368	0.10994	0.213825	0.325466	TMSB10	11.6568	11.1889	-0.0591076	0.00164789	0.006521	CYP46A1	0.145304	0.266478	0.874938	0.174362	0.289891
CYP46A1	0.0884129	0.145304	0.716749	9.24318e-05	0.00193126	ASTE1	1.69057	1.80821	0.0970483	0.0348401	0.0734974	ZZZ3	2.14656	2.28918	0.092803	0.0716712	0.158781
ZZZ3	2.06067	2.14656	0.0589131	0.176589	0.284504	RNF19A	3.40398	3.7704	0.147494	0.000442539	0.00228817	USP2	1.21538	1.18337	-0.0385057	0.218518	0.337469
USP2	0.678655	1.21538	0.84066	3.17733e-07	3.79596e-05	PEX3	2.26103	2.53384	0.164347	0.000850376	0.00386412	CASR	2.32592	1.97488	-0.236042	0.0723936	0.159833
CASR	2.07708	2.32592	0.163247	0.41564	0.514804	GABARAPL2	4.84289	4.89584	0.015688	0.687627	0.734436	TUBG2	2.66543	2.86466	0.103997	0.148438	0.259919
TUBG2	2.76395	2.66543	-0.0523648	0.477859	0.56888	MYOC	0.0554858	0.233964	2.0761	5.57202e-05	0.000439897	RPL26L1	3.48417	3.61766	0.0542437	0.117869	0.222695
RPL26L1	3.74546	3.48417	-0.104327	0.00679602	0.0305008	SH3YL1	3.08498	2.5869	-0.254041	2.0901e-06	3.274e-05	FLT4	1.2924	1.60907	0.316177	0.000144106	0.00203637
FLT4	1.05816	1.2924	0.288488	0.00337621	0.0192231	FAM136A	3.87261	3.59321	-0.108031	1.13573e-05	0.000124193	NSUN2	3.52639	3.67795	0.0607115	0.0331768	0.0939683
NSUN2	3.80488	3.52639	-0.109661	0.00188571	0.0130623	VCL	4.5544	4.69896	0.0450789	0.11461	0.186186	FBXO42	2.06582	2.19381	0.0867205	0.020999	0.0688057
FBXO42	1.92156	2.06582	0.104439	0.00601841	0.0281309	DEPDC1B	1.47487	1.00402	-0.554801	0.000179497	0.00111288	MFAP3	1.82137	2.11109	0.212965	0.0124276	0.0480233
MFAP3	1.65848	1.82137	0.135166	0.295292	0.40578	DAPK2	0.749731	0.782075	0.0609328	0.435863	0.516502	MRI1	2.51592	2.68437	0.0934982	0.122221	0.228147
MRI1	2.84589	2.51592	-0.177791	0.00274094	0.0167415	NSMAF	2.49059	2.6829	0.107304	0.00343949	0.0116935	METTL1	2.70679	2.78479	0.0409862	0.334213	0.449039
METTL1	2.80488	2.70679	-0.0513561	0.284331	0.395323	ADSS	4.41423	4.16482	-0.083908	0.00198923	0.00756792	HOXC8	0.724155	0.870188	0.265028	0.193955	0.311608
HOXC8	0.99975	0.724155	-0.465268	0.0294522	0.0825779	STAP1	0.47623	1.0315	1.11502	0.000471077	0.00240534	AGA	3.10452	2.99102	-0.0537309	0.0969825	0.195148
PI4K2B	2.69483	2.49086	-0.113548	0.0717909	0.153042	TIMP2	6.23902	7.06308	0.17898	1.67165e-08	8.67621e-07	PI4K2B	2.49086	2.53311	0.0242634	0.733743	0.782286
BOD1L1	1.9487	1.97572	0.0198624	0.721181	0.7709	RFC1	2.8405	3.09799	0.125188	0.000996591	0.0043974	BOD1L1	1.97572	2.24857	0.186628	0.00183232	0.0127912
MAT2B	4.03834	3.91342	-0.0453333	0.259836	0.371558	TBC1D23	2.82437	3.02919	0.101005	0.00320208	0.0110476	TLL1	0.582806	0.6504	0.158311	0.588476	0.664605
TLL1	0.306816	0.582806	0.925642	5.54045e-06	0.000299591	CUL3	2.65323	2.66161	0.00454948	0.940319	0.950638	EDC4	2.69696	2.93417	0.121619	0.00101953	0.00845066
EDC4	2.85136	2.69696	-0.080318	0.0181851	0.0597466	MYOM2	0.458673	0.49468	0.109029	0.573497	0.636849	TRIO	2.4889	2.962	0.251062	1.16701e-07	1.00187e-05
TRIO	2.5075	2.4889	-0.0107398	0.907425	0.924051	OTC	0.800019	0.387891	-1.04438	0.0525378	0.101451	VCAN	4.44603	5.30715	0.255419	2.69002e-05	0.000602362
CLEC16A	2.03257	1.97198	-0.0436571	0.721181	0.7709	CYP46A1	0.0884129	0.266478	1.59169	2.06123e-07	5.468e-06	CLEC16A	1.97198	2.05866	0.0620601	0.391951	0.500395
MSR1	1.76008	2.41182	0.454487	0.000994345	0.00863289	ZZZ3	2.06067	2.28918	0.151716	0.00167942	0.00662565	MSR1	2.41182	2.71078	0.168586	0.0760952	0.165445
CDH1	6.36905	6.03561	-0.0775793	0.0108877	0.0419426	USP2	0.678655	1.18337	0.802154	4.85777e-05	0.000394264	SKIV2L2	3.10563	3.16734	0.0283862	0.491988	0.584208
SKIV2L2	3.21831	3.10563	-0.0514207	0.270149	0.381582	CASR	2.07708	1.97488	-0.0727957	0.592526	0.653622	DNAH5	0.523357	0.65159	0.31617	0.131301	0.239338
DNAH5	0.609677	0.523357	-0.22025	0.206547	0.317109	TUBG2	2.76395	2.86466	0.051632	0.569727	0.634013	ZFYVE16	1.86471	2.09698	0.169365	0.00335148	0.0193636
FAM65A	3.65047	3.60491	-0.0181216	0.472899	0.564418	RPL26L1	3.74546	3.61766	-0.0500835	0.0668148	0.122214	FAM65A	3.60491	3.91609	0.119453	0.000155105	0.0021551
C6	2.19314	3.9631	0.853633	1.29878e-06	0.000108709	FLT4	1.05816	1.60907	0.604664	1.2493e-08	6.94996e-07	C6	3.9631	2.353	-0.75213	3.80904e-08	4.24042e-06
SOX30	0.216641	0.187117	-0.211364	0.106097	0.200206	NSUN2	3.80488	3.67795	-0.048949	0.0299148	0.0651359	RAI14	3.03649	3.60106	0.246017	1.48012e-08	1.93022e-06
PNKP	3.58452	3.27116	-0.131978	0.0288602	0.0814471	FBXO42	1.92156	2.19381	0.19116	1.0951e-07	3.42891e-06	SOX30	0.187117	0.271477	0.53689	0.000571308	0.0055998
BEST2	0.046997	0.118927	1.33944	0.588578	0.661001	MFAP3	1.65848	2.11109	0.34813	7.94999e-05	0.000580742	PNKP	3.27116	3.31531	0.0193426	0.860465	0.885458
SPDL1	1.59002	1.48723	-0.0964102	0.325891	0.434708	MRI1	2.84589	2.68437	-0.0842924	0.0505917	0.0984186	BEST2	0.118927	0.024693	-2.2679	0.212373	0.331285
PQLC2	2.7316	2.85035	0.0613926	0.195253	0.305434	HOXC8	0.99975	0.870188	-0.20024	0.223481	0.312573	PHLPP2	0.835923	1.06812	0.353635	2.91544e-05	0.000636699
CTNS	2.38381	2.51463	0.0770781	0.0783497	0.162468	AGA	3.17017	2.99102	-0.0839206	0.0945072	0.160044	SPDL1	1.48723	1.70741	0.199182	0.00227152	0.0148149
RTN4R	1.66896	1.56313	-0.0945097	0.318055	0.427293	PI4K2B	2.69483	2.53311	-0.0892846	0.0684814	0.124671	STAU2	2.05133	2.19899	0.100284	0.102623	0.202788
CDH10	0.118545	0.273209	1.20457	2.45394e-05	0.00082753	BOD1L1	1.9487	2.24857	0.206491	0.00188057	0.00725048	CTNS	2.51463	2.61509	0.0565139	0.148438	0.259919
INPP4A	1.43788	1.51207	0.072577	0.246514	0.358058	MAT2B	4.03834	3.98373	-0.0196418	0.129317	0.204511	PHF23	3.68759	3.90387	0.0822249	0.00751168	0.033818
RAB27B	2.85048	2.36555	-0.269034	0.0035547	0.0199189	TLL1	0.306816	0.6504	1.08395	3.99947e-06	5.42028e-05	CDH10	0.273209	0.501342	0.87579	0.618712	0.689371
PSMA4	4.03796	3.86518	-0.0630913	0.115052	0.211869	EDC4	2.85136	2.93417	0.0413009	0.988938	0.991048	INPP4A	1.51207	1.83843	0.281949	6.80885e-06	0.000219373
MYO16	0.100202	0.123791	0.304997	0.0404567	0.102437	TRIO	2.5075	2.962	0.240323	3.69129e-06	5.07951e-05	MYO16	0.123791	0.176786	0.514098	0.0933618	0.190324
LSG1	3.41713	3.25496	-0.0701468	0.130603	0.230632	VCAN	4.2857	5.30715	0.308405	7.92438e-06	9.33526e-05	LSG1	3.25496	3.33163	0.0335878	0.372066	0.483216
PARP3	3.65199	3.3307	-0.132859	0.0139688	0.0499405	CLEC16A	2.03257	2.05866	0.018403	0.766692	0.80183	TNC	3.00907	3.83315	0.349211	0.000335247	0.00382226
TNC	2.66867	3.00907	0.173197	0.270149	0.381582	MSR1	1.76008	2.71078	0.623073	3.30804e-07	7.89795e-06	FAM65C	0.435637	0.617741	0.503875	0.00172201	0.0122459
THAP3	1.99044	2.00576	0.0110646	0.555557	0.633795	CDH1	6.36905	5.79031	-0.137438	0.00155653	0.00622656	TDP1	1.57459	1.73986	0.143992	0.015624	0.056263
FAM65C	0.363168	0.435637	0.26249	0.0508412	0.120696	SKIV2L2	3.21831	3.16734	-0.0230345	0.394606	0.47996	AIFM2	2.49348	2.47079	-0.0131866	0.409869	0.515674
TDP1	1.62812	1.57459	-0.0482314	0.627537	0.693388	DNAH5	0.609677	0.65159	0.0959199	0.971244	0.97639	MED17	1.7614	1.88385	0.0969633	0.0641085	0.147499
AIFM2	2.66799	2.49348	-0.0975923	0.184418	0.293732	ZFYVE16	1.87299	2.09698	0.162972	0.00136121	0.00560083	CAPG	6.43103	6.27306	-0.0358788	0.796433	0.832676
SPATA7	1.15924	1.2533	0.112551	0.0319295	0.0870934	FAM65A	3.65047	3.91609	0.101331	0.0455765	0.0904835	USH2A	0.0243351	0.0397663	0.708505	0.189297	0.306515
RETSAT	4.98005	4.58852	-0.118131	0.00383856	0.0209428	C6	2.19314	2.353	0.101503	0.659286	0.710577	ZPBP	0.0216992	0.020445	-0.0858908	0.111967	0.215241
CAPG	6.8758	6.43103	-0.0964794	0.0345825	0.09197	RAI14	3.13116	3.60106	0.201725	9.01735e-06	0.00010338	TG	0.162644	0.205997	0.3409	0.152323	0.264389
AP2S1	5.58223	5.34925	-0.0615045	0.0668738	0.14559	SOX30	0.216641	0.271477	0.325525	0.168156	0.250841	BARX2	2.35037	1.92695	-0.286568	0.0078241	0.0347166
USH2A	0.0232878	0.0243351	0.0634677	0.295292	0.40578	PNKP	3.58452	3.31531	-0.112636	0.0115319	0.0307367	DCUN1D1	2.04245	2.1928	0.102478	0.0228435	0.0731857
ZPBP	0.0101218	0.0216992	1.10017	0.00397172	0.021464	PHLPP2	0.82386	1.06812	0.374608	3.82464e-05	0.0003268	JADE2	2.80073	2.96782	0.0835979	0.0709548	0.157827
TG	0.101816	0.162644	0.675753	0.0146052	0.0514688	SPDL1	1.59002	1.70741	0.102772	0.0693274	0.12583	LCP2	2.16633	2.45371	0.179715	0.0716712	0.158781
ADAM28	3.45446	3.00287	-0.202118	0.0537609	0.125349	STAU2	2.07312	2.19899	0.0850371	0.118484	0.191071	TRIT1	2.87	2.90614	0.018053	0.334213	0.449039
BARX2	2.73253	2.35037	-0.217351	0.0193993	0.0623436	PQLC2	2.7316	2.8654	0.0689902	0.0967145	0.163002	GUCA2B	0.730974	0.483889	-0.595145	0.0203442	0.0673939
DCUN1D1	2.08327	2.04245	-0.0285517	0.667881	0.726876	CTNS	2.38381	2.61509	0.133592	0.00382575	0.012748	CUL7	3.17273	3.39833	0.099102	0.00110531	0.00897689
ZIC2	0.747135	0.344305	-1.11768	0.0127264	0.0469518	RTN4R	1.66896	1.37667	-0.277766	0.0177463	0.0431167	CTNNA1	5.60705	5.67163	0.0165226	0.63979	0.705792
LCP2	1.66915	2.16633	0.376139	0.00164524	0.0119808	PHF23	3.75217	3.90387	0.0571802	0.00620215	0.0188093	PHKA2	2.24006	2.28154	0.0264712	0.68616	0.742324
CUL7	3.27175	3.17273	-0.0443363	0.302755	0.413051	CDH10	0.118545	0.501342	2.08036	2.95832e-05	0.000265526	CNTLN	0.765846	0.905426	0.241543	0.00376764	0.020993
CTNNA1	5.94755	5.60705	-0.0850549	0.000789985	0.00743096	INPP4A	1.43788	1.83843	0.354526	4.17879e-07	9.46423e-06	EPHA3	2.20789	2.30755	0.0636941	0.420323	0.525016
PHKA2	2.38266	2.24006	-0.0890374	0.209444	0.320167	RAB27B	2.85048	2.15011	-0.406798	5.34095e-05	0.000425169	HSPA5	7.32106	7.46035	0.0271906	0.052602	0.129221
CNTLN	0.653032	0.765846	0.2299	0.0185823	0.0606026	PSMA4	4.03796	3.90827	-0.0470967	0.0934188	0.15868	DSG2	5.01014	4.89454	-0.0336794	0.807022	0.84153
EPHA3	1.60207	2.20789	0.462734	0.00304349	0.0179011	MYO16	0.100202	0.176786	0.819095	0.00126001	0.0052738	GEMIN8	2.89759	2.86023	-0.0187241	0.560474	0.64107
HSPA5	7.41528	7.32106	-0.0184474	0.195253	0.305434	PARP3	3.65199	3.41312	-0.0975921	0.00569878	0.0175756	OFD1	2.90989	3.04267	0.0643745	0.248968	0.367996
DSG2	5.21372	5.01014	-0.0574621	0.187084	0.296761	TNC	2.66867	3.83315	0.522409	5.4972e-06	6.92589e-05	GPM6B	0.944853	1.26133	0.416779	0.0207464	0.0682557
GEMIN8	2.98115	2.89759	-0.0410154	0.187084	0.296761	THAP3	1.99044	2.0517	0.0437348	0.163079	0.244951	PREX2	0.854823	1.00194	0.229104	0.203526	0.322183
OFD1	3.18797	2.90989	-0.131676	0.00393766	0.0212964	FAM65C	0.363168	0.617741	0.766365	5.35427e-06	6.77262e-05	WDR37	2.17498	2.34836	0.110647	0.0681476	0.153528
GPM6B	0.694361	0.944853	0.444404	0.00117862	0.00964003	TDP1	1.62812	1.73986	0.0957603	0.0546496	0.104562	YTHDC2	1.82377	2.04227	0.163252	0.00645964	0.0304639
PREX2	0.578701	0.854823	0.562808	0.00131849	0.0103307	AIFM2	2.66799	2.47079	-0.110779	0.0188398	0.0452971	CTPS2	2.47133	2.45767	-0.00799369	0.662813	0.724045
WDR37	2.1086	2.17498	0.0447198	0.273648	0.385163	SPATA7	1.15924	1.33176	0.200155	0.0120897	0.0319617	ATP6V1H	3.27229	3.40535	0.0575025	0.239719	0.358878
CTPS2	2.6603	2.47133	-0.1063	0.0282778	0.0804205	MED17	1.78332	1.88385	0.0791134	0.0811271	0.142185	POLR2B	3.8784	4.06202	0.0667377	0.122221	0.228147
POLR2B	3.86352	3.8784	0.00554647	0.733223	0.780816	RETSAT	4.98005	4.46046	-0.158969	2.8595e-05	0.000258275	FAM214A	1.91383	2.11206	0.142189	0.0405842	0.108412
FAM214A	1.89528	1.91383	0.0140513	0.679593	0.736898	CAPG	6.8758	6.27306	-0.132358	0.00850023	0.024112	ARAP2	1.72028	1.82876	0.088217	0.131301	0.239338
ARAP2	1.83775	1.72028	-0.0952906	0.295292	0.40578	AP2S1	5.58223	5.41059	-0.0450564	0.0383223	0.0791588	TPR	3.3556	3.59707	0.100255	0.00495048	0.0252936
TPR	3.60216	3.3556	-0.102293	0.00647475	0.0295331	USH2A	0.0232878	0.0397663	0.771973	0.0597233	0.112088	KIAA0556	2.00331	2.10698	0.0727912	0.107521	0.209175
CP	2.85104	2.48958	-0.195589	0.240035	0.351829	ZPBP	0.0101218	0.020445	1.01428	0.151443	0.231265	DTNBP1	2.75473	2.7889	0.0177849	0.726877	0.776587
KIAA0556	2.09671	2.00331	-0.0657422	0.0453992	0.111234	TG	0.101816	0.205997	1.01665	3.22953e-05	0.000282695	XK	1.13621	0.872649	-0.380757	0.00264216	0.0164003
DTNBP1	2.70541	2.75473	0.0260654	0.240035	0.351829	ADAM28	3.45446	2.90995	-0.247468	0.0245214	0.0556158	ANO2	0.159475	0.227673	0.513636	0.00335148	0.0193636
ANO2	0.134715	0.159475	0.243413	0.318055	0.427293	BARX2	2.73253	1.92695	-0.50392	9.74076e-06	0.000110218	C12orf4	1.92504	2.06316	0.0999648	0.00871486	0.0374436
C12orf4	1.85866	1.92504	0.0506305	0.115052	0.211869	DCUN1D1	2.08327	2.1928	0.073926	0.101253	0.168971	SCML1	1.49545	1.68061	0.168404	0.0207464	0.0682557
SCML1	1.82284	1.49545	-0.285606	0.00601841	0.0281309	JADE2	2.77378	2.96782	0.09755	0.0358063	0.0750659	WWC3	2.85478	3.23694	0.181252	5.41633e-07	3.34834e-05
WWC3	2.73358	2.85478	0.0625855	0.118796	0.216595	ZIC2	0.747135	0.325222	-1.19995	0.00205946	0.00778894	ARHGAP6	0.956935	1.0631	0.151781	0.163062	0.276972
ARHGAP6	1.18571	0.956935	-0.309262	0.0611209	0.13686	LCP2	1.66915	2.45371	0.555854	5.91179e-07	1.22203e-05	FAM184B	0.0690927	0.0981184	0.50599	0.0166316	0.0585817
MAP4	4.23618	4.33034	0.0317143	0.116912	0.21418	TRIT1	2.86537	2.90614	0.020386	0.655276	0.707426	MAP4	4.33034	4.5317	0.0655741	0.0081481	0.035703
GOPC	3.03595	3.03987	0.00186046	0.751409	0.795034	GUCA2B	0.629704	0.483889	-0.379998	0.155556	0.236078	GOPC	3.03987	3.40127	0.162067	9.17919e-06	0.000269723
ROS1	0.331937	0.288526	-0.202211	0.472899	0.564418	CUL7	3.27175	3.39833	0.0547657	0.0643777	0.118796	ROS1	0.288526	0.404502	0.487449	0.278178	0.397245
USP28	1.96879	2.02179	0.0383186	0.218309	0.329698	CTNNA1	5.94755	5.67163	-0.0685323	0.000867498	0.00392697	HDAC9	0.786245	1.1386	0.534216	5.03081e-06	0.000176181
HDAC9	0.708104	0.786245	0.151017	0.16901	0.275951	CNTLN	0.653032	0.905426	0.471442	1.01502e-06	1.86054e-05	TSPAN17	3.55452	3.54876	-0.00234155	0.436294	0.538846
TSPAN17	3.72832	3.55452	-0.0688694	0.118796	0.216595	EPHA3	1.60207	2.30755	0.526428	0.000191774	0.00117411	CC2D2A	1.44181	1.62725	0.174556	0.0179156	0.0615914
NOP16	3.12727	2.85589	-0.130965	0.0094756	0.0381096	HSPA5	7.41528	7.46035	0.00874313	0.874411	0.893944	RRM2B	2.68558	2.92172	0.121587	0.0129163	0.0492792
CC2D2A	1.25545	1.44181	0.199671	0.0108877	0.0419426	DSG2	5.21372	4.89454	-0.0911414	0.154875	0.235131	ZNF800	2.09351	2.18953	0.0646966	0.350457	0.463698
RRM2B	2.59775	2.68558	0.0479713	0.429558	0.527322	GEMIN8	2.98115	2.86023	-0.0597395	0.0286802	0.0629645	SNX29	1.80387	2.21843	0.298441	8.08406e-07	4.43667e-05
TNFRSF17	0.510091	1.0483	1.03923	0.000789947	0.00743096	OFD1	3.18797	3.04267	-0.0673016	0.0978334	0.164539	LMO3	0.803815	0.667615	-0.267846	0.0401387	0.107589
SNX29	1.62873	1.80387	0.147343	0.0929291	0.182837	GPM6B	0.694361	1.26133	0.861183	1.16374e-07	3.58894e-06	GUCA1A	0.127641	0.233585	0.871862	0.0103453	0.0423074
LMO3	0.296727	0.803815	1.43773	3.66705e-09	2.68889e-06	PREX2	0.578701	1.00194	0.791912	2.39604e-06	3.6398e-05	RSF1	2.02264	2.22225	0.135779	0.00393544	0.0215767
MRPS10	4.26527	4.09475	-0.058861	0.0480555	0.115924	WDR37	2.1086	2.34836	0.155367	0.00550797	0.0171135	VPS13D	2.19189	2.23562	0.0285017	0.489116	0.582034
RSF1	2.05929	2.02264	-0.0259057	0.721181	0.7709	YTHDC2	1.89344	2.04227	0.109167	0.0891655	0.15319	CELF2	1.78481	2.22859	0.32036	0.0122683	0.0476567
VPS13D	2.04911	2.19189	0.0971795	0.132656	0.233051	CTPS2	2.6603	2.45767	-0.114294	0.0031451	0.0108799	FAM120A	4.89282	4.89709	0.00125592	0.782372	0.821204
CELF2	1.18903	1.78481	0.585988	0.000112681	0.00219979	ATP6V1H	3.33413	3.40535	0.0304893	0.288218	0.379043	R3HDM1	2.03544	2.23214	0.133082	0.000160897	0.00220206
FAM120A	5.05802	4.89282	-0.0479066	0.111401	0.207028	POLR2B	3.86352	4.06202	0.0722842	0.0676439	0.123471	COL9A2	2.44807	2.33139	-0.0704579	0.703023	0.756413
R3HDM1	2.06233	2.03544	-0.0189301	0.616205	0.684003	FAM214A	1.89528	2.11206	0.156241	0.0294983	0.0644347	KITLG	2.72383	2.80469	0.0422027	0.444409	0.545522
COL9A2	2.834	2.44807	-0.211191	0.0345825	0.09197	TPR	3.60216	3.59707	-0.0020378	0.647286	0.7007	ERCC8	1.10718	1.19376	0.108628	0.0309798	0.0897127
KITLG	2.80265	2.72383	-0.0411564	0.763611	0.805232	CP	2.85104	2.70836	-0.0740683	0.500422	0.574564	ADAMTS6	0.455986	0.726172	0.671321	6.54436e-07	3.85427e-05
ERCC8	1.15211	1.10718	-0.057395	0.393046	0.495646	DTNBP1	2.70541	2.7889	0.0438503	0.140904	0.218707	H6PD	3.94717	4.07805	0.0470619	0.143376	0.254126
ADAMTS6	0.673708	0.455986	-0.563131	0.00414287	0.0219519	XK	1.23803	0.872649	-0.504575	0.0134851	0.034872	VAMP3	5.2278	5.38784	0.0435013	0.0295856	0.0871122
H6PD	3.60564	3.94717	0.130564	0.0130602	0.0477082	ANO2	0.134715	0.227673	0.757049	0.000187597	0.00115336	PER3	2.28273	2.16854	-0.0740397	0.108522	0.210629
VAMP3	5.17982	5.2278	0.013302	0.739269	0.7854	C12orf4	1.85866	2.06316	0.150595	9.55844e-05	0.000671364	UTS2	0.227179	0.284397	0.324076	0.493422	0.585747
PER3	1.94517	2.28273	0.230865	0.0189869	0.0614707	SCML1	1.82284	1.68061	-0.117203	0.361611	0.4489	TNFRSF9	0.48412	0.67233	0.473805	0.0753428	0.164331
UTS2	0.297413	0.227179	-0.388635	0.63608	0.70082	WWC3	2.73358	3.23694	0.243838	1.67187e-07	4.70985e-06	EPN3	2.55267	1.88063	-0.440787	9.57631e-06	0.000276934
TNFRSF9	0.38279	0.48412	0.338814	0.0705347	0.151182	ARHGAP6	1.18571	1.0631	-0.157481	0.273379	0.364303	LTBP1	4.01466	4.52452	0.172485	0.000257274	0.00313561
EPN3	2.76934	2.55267	-0.117537	0.0960914	0.187057	FAM184B	0.0691688	0.0981184	0.504402	0.0194083	0.0463451	RCN1	3.80711	4.20278	0.142646	3.56014e-05	0.000733068
LTBP1	3.7639	4.01466	0.0930526	0.164094	0.269991	MAP4	4.23618	4.5317	0.0972885	4.85777e-05	0.000394264	ELN	4.50072	4.79762	0.0921621	0.0443015	0.114923
RCN1	3.95959	3.80711	-0.0566543	0.448529	0.543806	GOPC	3.03595	3.40127	0.163927	2.40861e-05	0.000224997	RFC2	3.31689	3.45168	0.0574684	0.101665	0.201404
ELN	3.97684	4.50072	0.178533	0.0061672	0.0285731	ROS1	0.331937	0.404502	0.285238	0.887527	0.905167	ARID1B	2.41039	2.60314	0.110985	0.0106324	0.0429656
RFC2	3.47435	3.31689	-0.0669136	0.171508	0.278826	USP28	1.96879	2.07783	0.0777615	0.17688	0.261122	CLPTM1L	4.26075	4.2548	-0.00201588	0.796433	0.832676
ARID1B	2.34742	2.41039	0.0381934	0.508207	0.594478	HDAC9	0.708104	1.1386	0.685233	5.39582e-08	2.07504e-06	NEDD4L	2.06238	1.67367	-0.301298	3.97188e-07	2.60225e-05
CLPTM1L	4.46802	4.26075	-0.0685278	0.00304349	0.0179011	TSPAN17	3.72832	3.54876	-0.071211	0.00432593	0.0140535	FOXP3	1.24913	1.46408	0.229073	0.270185	0.389293
NEDD4L	1.99567	2.06238	0.0474385	0.147737	0.250767	NOP16	3.12727	2.8281	-0.145072	0.000283655	0.00159943	PPP1R3F	1.06437	1.45384	0.449865	1.28531e-06	6.19711e-05
FOXP3	1.00525	1.24913	0.313377	0.0282778	0.0804205	CC2D2A	1.25545	1.62725	0.374227	1.16505e-05	0.000126578	HEXB	4.94518	4.9311	-0.00411283	0.723453	0.773683
PPP1R3F	1.12568	1.06437	-0.080797	0.679593	0.736898	RRM2B	2.59775	2.92172	0.169558	0.00222404	0.00826227	PTCD2	0.746217	0.856649	0.199107	0.0029776	0.0178513
HEXB	4.90708	4.94518	0.0111581	0.463064	0.556051	ZNF800	2.08022	2.18953	0.0738814	0.150105	0.229545	KIAA2022	0.212867	0.325166	0.611226	0.43899	0.541303
PTCD2	0.773967	0.746217	-0.0526757	0.397504	0.499511	TNFRSF17	0.510091	0.937109	0.877461	0.0113497	0.030365	JKAMP	3.18192	3.39865	0.0950654	0.0257219	0.079434
KIAA2022	0.0853658	0.212867	1.31822	8.45039e-08	1.60926e-05	SNX29	1.62873	2.21843	0.445784	5.13929e-09	3.70883e-07	DKK3	4.39392	4.95121	0.172272	0.000117523	0.00175108
JKAMP	3.285	3.18192	-0.0459952	0.147737	0.250767	LMO3	0.296727	0.667615	1.16988	7.72155e-06	9.16035e-05	ARHGEF5	2.22873	1.99458	-0.16014	0.0124276	0.0480233
DKK3	4.26303	4.39392	0.0436302	0.401993	0.503612	MRPS10	4.26527	4.11196	-0.0528097	0.0128705	0.0336288	NFE2L3	3.27022	3.37447	0.045274	0.350457	0.463698
ARHGEF5	2.64244	2.22873	-0.245648	0.0002674	0.00378694	GUCA1A	0.13242	0.233585	0.818831	0.0219872	0.0511641	MCUR1	2.33544	2.40337	0.0413662	0.230716	0.349835
NFE2L3	3.5373	3.27022	-0.113262	0.0271433	0.0782206	RSF1	2.05929	2.22225	0.109874	0.0234822	0.0537567	LIMA1	4.71471	4.72643	0.00358062	0.71662	0.768146
MCUR1	2.30957	2.33544	0.0160651	0.406512	0.507319	VPS13D	2.04911	2.23562	0.125681	0.0172207	0.0420931	SLC4A8	0.373839	0.568487	0.604707	0.136033	0.24527
LIMA1	5.01033	4.71471	-0.0877348	0.0568192	0.130157	CELF2	1.18903	2.22859	0.906348	3.4388e-09	2.864e-07	LAMC3	1.4362	1.35327	-0.0858133	0.551286	0.633338
LETMD1	3.31028	3.15092	-0.0711762	0.0898509	0.17859	FAM120A	5.05802	4.89709	-0.0466507	0.0773343	0.137029	PTGER3	0.757833	1.06876	0.495984	0.00156795	0.0114718
SLC4A8	0.264934	0.373839	0.496786	0.0156076	0.0537611	R3HDM1	2.06233	2.23214	0.114152	0.00177738	0.00693288	TNIP3	0.182162	0.233147	0.35602	0.235186	0.354553
LAMC3	0.853152	1.4362	0.751385	4.57679e-06	0.000260588	COL9A2	2.834	2.33139	-0.281648	0.00396301	0.0130988	MAPK9	2.50718	2.55587	0.0277509	0.560474	0.64107
PTGER3	0.452912	0.757833	0.742648	2.0952e-05	0.000746159	ERCC8	1.15211	1.19376	0.0512329	0.413346	0.496411	COL23A1	0.653749	0.729507	0.158186	0.187762	0.304986
TNIP3	0.153777	0.182162	0.244382	0.0274226	0.0789349	ADAMTS6	0.673708	0.726172	0.10819	0.184098	0.26935	FAM160A2	3.54015	3.62633	0.0346982	0.509411	0.598631
MAPK9	2.53061	2.50718	-0.0134218	0.539537	0.620686	H6PD	3.60564	4.07805	0.177626	0.000117338	0.000794547	HOMER3	2.83944	3.07138	0.113281	0.0483021	0.121962
COL23A1	0.485502	0.653749	0.429258	0.0319295	0.0870934	VAMP3	5.17982	5.38784	0.0568033	0.0404418	0.0825549	RAD51	1.35346	1.34615	-0.0078184	0.918177	0.932098
BCAR1	4.22556	3.83417	-0.14023	0.0122042	0.0453639	PER3	1.94517	2.16854	0.156825	0.127922	0.20282	POLQ	0.449273	0.497716	0.14773	0.128984	0.236388
FAM160A2	4.03378	3.54015	-0.188323	0.000177365	0.00292186	TNFRSF9	0.38279	0.67233	0.812618	0.000902703	0.0040524	CYBA	5.68267	5.50839	-0.0449384	0.286374	0.405116
HERPUD1	4.62489	4.9236	0.0902955	0.00274094	0.0167415	EPN3	2.76934	1.88063	-0.558324	1.82915e-07	5.01005e-06	THOC3	1.5281	1.58684	0.0544179	0.374517	0.485217
HOMER3	2.98531	2.83944	-0.0722775	0.26668	0.378481	LTBP1	3.7639	4.52452	0.265537	1.22586e-05	0.000131935	HEBP2	2.89491	2.8155	-0.040127	0.524173	0.610981
RAD51	1.58922	1.35346	-0.231662	0.0352745	0.0931632	RCN1	3.95959	4.20278	0.0859912	0.0067452	0.0200884	MPHOSPH9	0.862633	1.06493	0.303935	0.00136053	0.0104135
POLQ	0.520033	0.449273	-0.211012	0.120703	0.218704	ELN	3.97684	4.79762	0.270695	1.3228e-05	0.00014052	PLEKHA5	2.03281	2.02327	-0.0067875	0.730308	0.779431
PIK3CB	2.80933	2.74466	-0.0335994	0.371212	0.476167	ARID1B	2.34742	2.60314	0.149179	0.000283655	0.00159943	PRSS8	5.79753	5.05246	-0.198452	0.0200044	0.0665785
CYBA	5.93014	5.68267	-0.0614974	0.0445418	0.109788	CLPTM1L	4.46802	4.2548	-0.0705437	0.000120024	0.000809485	SIKE1	2.36626	2.52838	0.095601	0.0185896	0.0631859
THOC3	1.81896	1.5281	-0.251376	0.000364141	0.00458349	NEDD4L	1.99567	1.67367	-0.253859	0.00356411	0.0120287	RRP12	2.49748	2.5173	0.0114043	0.68616	0.742324
HEBP2	3.25621	2.89491	-0.169673	0.000436987	0.00513079	FOXP3	1.00525	1.46408	0.54245	0.00109945	0.00475369	FNIP2	2.37692	2.59579	0.127076	0.0641085	0.147499
MPHOSPH9	0.781978	0.862633	0.141618	0.122635	0.220957	PPP1R3F	1.12568	1.45384	0.369068	0.0003025	0.00168252	MSMO1	4.62059	4.61848	-0.000658325	0.503568	0.593966
PLEKHA5	2.28326	2.03281	-0.167617	0.0705347	0.151182	HEXB	4.90708	4.9311	0.00704527	0.619642	0.676966	TTC17	2.81815	2.93208	0.0571768	0.124444	0.230817
PRSS8	6.33533	5.79753	-0.127982	0.000207956	0.00323698	PTCD2	0.773967	0.856649	0.146432	0.0870981	0.15037	FOXN3	2.53088	2.74426	0.116778	0.0401387	0.107589
RRP12	2.71052	2.49748	-0.118098	0.0149328	0.0521892	KIAA2022	0.0853658	0.325166	1.92945	1.06156e-08	6.20686e-07	METTL24	0.749263	0.919435	0.295276	0.0428752	0.112233
FNIP2	2.52427	2.37692	-0.0867727	0.20368	0.314226	JKAMP	3.285	3.39865	0.0490702	0.465827	0.544222	AKR7A2	4.61694	4.57561	-0.0129722	0.477717	0.5728
MSMO1	5.22242	4.62059	-0.176641	0.000643892	0.00654807	DKK3	4.26303	4.95121	0.215902	1.57822e-05	0.000160969	MRTO4	3.71729	3.76648	0.0189655	0.82475	0.856072
TTC17	2.89056	2.81815	-0.036601	0.156924	0.261737	ARHGEF5	2.64244	1.99458	-0.405787	3.02755e-10	6.1084e-08	NNAT	0.728315	1.07356	0.559774	0.00123664	0.00972065
ALX4	0.0190892	0.0195068	0.0312277	0.800123	0.834686	NFE2L3	3.5373	3.37447	-0.0679882	0.261419	0.352239	USE1	3.09609	3.09904	0.00137344	0.983608	0.98667
FSTL4	0.237247	0.416744	0.81277	0.000302776	0.00407923	MCUR1	2.30957	2.40337	0.0574313	0.0486593	0.0953484	MCF2L2	0.0929563	0.178213	0.938974	4.60222e-05	0.000881374
FOXN3	2.14617	2.53088	0.237875	0.000813206	0.00755784	LIMA1	5.01033	4.72643	-0.0841542	0.0362979	0.0758357	NRIP2	1.5677	1.68799	0.106658	0.15897	0.272608
METTL24	0.574451	0.749263	0.383289	0.0412473	0.103893	LETMD1	3.31028	3.16891	-0.0629643	0.070182	0.127011	AP5M1	1.80958	1.90693	0.0755975	0.288443	0.407033
NNAT	0.947944	0.728315	-0.38024	0.0277055	0.0793013	SLC4A8	0.264934	0.568487	1.10149	0.000567326	0.00279613	ANAPC4	2.0225	2.14793	0.086806	0.0628069	0.145728
USE1	3.30588	3.09609	-0.0945867	0.0239725	0.0721239	LAMC3	0.853152	1.35327	0.665572	0.000480965	0.00244147	KCNQ1	4.13245	3.12183	-0.404606	1.24164e-09	2.61565e-07
MCF2L2	0.0865976	0.0929563	0.102225	0.638957	0.702453	PTGER3	0.452912	1.06876	1.23863	4.80743e-10	8.00773e-08	THRAP3	4.74124	4.92848	0.0558776	0.0028475	0.017245
NRIP2	1.45104	1.5677	0.111562	0.195253	0.305434	TNIP3	0.153777	0.233147	0.600402	0.000622031	0.00301034	PHPT1	5.30051	5.2766	-0.00652231	0.486252	0.57976
LAMA3	4.43014	3.80532	-0.219334	0.00164524	0.0119808	COL23A1	0.485502	0.729507	0.587443	0.00133523	0.00551531	ENTPD2	2.87133	2.82355	-0.0242071	0.849717	0.876307
AP5M1	1.77832	1.80958	0.0251374	0.566364	0.642376	BCAR1	4.22556	3.88512	-0.121184	0.00109945	0.00475369	ARID4B	2.32907	2.55405	0.133035	0.00825874	0.0360264
ANAPC4	2.1561	2.0225	-0.0922827	0.0656889	0.143828	FAM160A2	4.03378	3.62633	-0.153624	4.74362e-05	0.000387303	OPN3	1.42107	1.7828	0.327163	1.25867e-05	0.000339939
KCNQ1	3.79403	4.13245	0.123265	0.0149328	0.0521892	HERPUD1	4.62489	4.89746	0.0826138	0.00136121	0.00560083	SDCCAG8	2.44016	2.64126	0.11425	0.00474379	0.0245351
TRAPPC3	3.94809	3.88148	-0.0245467	0.582762	0.656208	RAD51	1.58922	1.34615	-0.23948	0.0196982	0.0468692	KIF1B	2.03909	2.17075	0.0902726	0.127837	0.234994
PHPT1	5.42676	5.30051	-0.0339619	0.388618	0.491726	PIK3CB	2.80933	2.70708	-0.0534934	0.191533	0.277717	FOXC1	2.48275	2.63465	0.0856714	0.177276	0.292781
ENTPD2	3.58172	2.87133	-0.318937	0.00131849	0.0103307	CYBA	5.93014	5.50839	-0.106436	0.0031451	0.0108799	SYNE2	2.70286	2.69992	-0.00157209	0.545202	0.628272
LY75	2.34495	1.91313	-0.293623	0.000112681	0.00219979	THOC3	1.81896	1.58684	-0.196958	0.00267244	0.00955991	ATP9A	4.08844	4.12914	0.0142893	0.889248	0.908692
ARID4B	2.45638	2.32907	-0.076781	0.329856	0.438345	HEBP2	3.25621	2.8155	-0.2098	9.32646e-07	1.73847e-05	CBLN4	0.603567	0.794713	0.39692	0.195527	0.313306
OPN3	1.60406	1.42107	-0.17475	0.132656	0.233051	MPHOSPH9	0.781978	1.06493	0.445554	8.81349e-07	1.66781e-05	CHRDL2	1.21231	1.53497	0.340446	0.246167	0.365553
SDCCAG8	2.61748	2.44016	-0.101205	0.0359782	0.0943976	PLEKHA5	2.28326	2.02327	-0.174404	0.0294983	0.0644347	FAM168A	3.15181	3.55896	0.175274	4.13278e-06	0.000149118
PTPRN	1.40121	2.32265	0.729094	8.36466e-05	0.00181414	PRSS8	6.33533	5.05246	-0.326434	1.7752e-07	4.9187e-06	RELT	1.29296	1.67876	0.376722	3.85417e-05	0.000773829
HHAT	1.34866	1.27511	-0.0809084	0.321957	0.430962	SIKE1	2.37408	2.52838	0.0908442	0.0719171	0.12953	GALC	2.92974	3.12841	0.0946559	0.0823378	0.174393
KIF1B	1.85106	2.03909	0.139571	0.0189869	0.0614707	RRP12	2.71052	2.5173	-0.106693	0.00569878	0.0175756	NOP58	4.08616	4.2458	0.0552912	0.0578171	0.137685
FOXC1	2.68054	2.48275	-0.110586	0.164094	0.269991	MSMO1	5.22242	4.61848	-0.177299	9.12973e-05	0.000647924	SZRD1	4.62907	4.80992	0.0552901	0.00538847	0.0267143
SYNE2	2.70886	2.70286	-0.00319721	0.901072	0.918619	FSTL4	0.237247	0.522096	1.13792	0.0325215	0.069564	KCNH2	1.62324	1.8765	0.209163	0.744081	0.790282
PLEKHH1	1.75533	1.32884	-0.401568	0.00364712	0.0202863	FOXN3	2.14617	2.74426	0.354653	3.0669e-08	1.34353e-06	CUL1	4.1569	4.31216	0.0529028	0.0433462	0.11312
ATP9A	4.05759	4.08844	0.0109275	0.907425	0.924051	METTL24	0.574451	0.919435	0.678564	3.0024e-05	0.000268557	FAM114A2	1.83883	2.01856	0.134537	0.0048118	0.0247932
CBLN4	0.246083	0.603567	1.29437	0.000703121	0.00691398	MRTO4	3.72171	3.76648	0.0172479	0.639336	0.693719	CYFIP2	1.9483	2.21759	0.186775	0.210094	0.328516
CHRDL2	0.784349	1.21231	0.628197	0.00199063	0.013527	NNAT	0.947944	1.07356	0.179535	0.51106	0.583831	TAB2	3.73187	4.00462	0.101765	0.000457917	0.00479744
FAM168A	2.93301	3.15181	0.103797	0.0374216	0.0969653	USE1	3.30588	3.09904	-0.0932133	0.00783135	0.0225927	GINM1	4.39233	4.58909	0.0632225	0.0215123	0.0699436
RELT	1.41735	1.29296	-0.132521	0.10961	0.204817	MCF2L2	0.0865976	0.178213	1.0412	3.38992e-05	0.000294753	EIF2AK2	2.85152	3.06619	0.104714	0.041946	0.110743
GALC	2.94031	2.92974	-0.00519482	0.800559	0.834686	NRIP2	1.45104	1.68799	0.218221	0.00417729	0.013662	USP36	2.64037	2.92966	0.149992	1.50892e-06	6.9685e-05
NOP58	4.48812	4.08616	-0.135367	0.000195168	0.003116	LAMA3	4.43014	3.80825	-0.218222	0.0104844	0.0285395	KMT2C	2.19139	2.31251	0.0776078	0.381929	0.491588
SZRD1	4.45748	4.62907	0.0544959	0.0244775	0.0731396	AP5M1	1.77832	1.90693	0.100735	0.12246	0.195993	CCDC85A	0.168759	0.235184	0.47883	0.0114989	0.0453367
KCNH2	1.38266	1.62324	0.231428	0.0883429	0.176433	ANAPC4	2.1561	2.14793	-0.00547673	0.779426	0.812877	PUM2	4.04818	4.24024	0.0668748	0.0195227	0.0654164
FAM114A2	1.70225	1.83883	0.111348	0.0255153	0.0751798	KCNQ1	3.79403	3.12183	-0.281341	0.00118871	0.00505742	MRPL43	3.85765	3.75874	-0.0374704	0.0223026	0.0718311
CYFIP2	1.68296	1.9483	0.211218	0.0229895	0.0701708	THRAP3	4.68391	4.92848	0.0734307	6.59981e-05	0.000499959	ITIH4	0.420939	0.224482	-0.907011	8.0619e-05	0.00134215
TAB2	3.69391	3.73187	0.0147528	0.588276	0.660741	PHPT1	5.42676	5.2766	-0.0404842	0.108376	0.178406	C4orf27	3.32123	3.48297	0.0685993	0.00982439	0.0407591
GINM1	4.19311	4.39233	0.0669662	0.0288602	0.0814471	ENTPD2	3.58172	2.82355	-0.343144	1.39144e-05	0.000145865	ZFR	3.48411	3.72421	0.0961441	0.00637091	0.0301858
USP36	2.79118	2.64037	-0.0801332	0.106097	0.200206	LY75	2.34495	1.90507	-0.299714	0.000157127	0.00100238	ZNF280C	0.7893	0.953306	0.272367	0.00078471	0.00704592
KMT2C	2.1287	2.19139	0.0418761	0.366937	0.472222	ARID4B	2.45638	2.55405	0.0562537	0.187788	0.273339	PHF21B	0.109217	0.25928	1.24731	0.0470203	0.119875
MCOLN3	0.439629	0.678272	0.625577	0.000411315	0.00494995	OPN3	1.60406	1.7828	0.152413	0.0202892	0.0479055	TRAF1	1.85976	2.15957	0.215622	0.0231182	0.0737637
CCDC85A	0.134051	0.168759	0.332175	0.0181851	0.0597466	SDCCAG8	2.61748	2.64126	0.0130447	0.891921	0.908925	RC3H2	2.33036	2.58109	0.147429	0.00075918	0.00687985
PUM2	4.15343	4.04818	-0.0370297	0.314183	0.424109	PTPRN	1.40121	2.83664	1.01751	3.22953e-05	0.000282695	IL17RB	2.31479	2.23451	-0.0509207	0.0776185	0.167546
MRPL43	4.02327	3.85765	-0.0606482	0.0913796	0.180589	HHAT	1.34866	1.27128	-0.0852496	0.278266	0.36926	TRAF3IP2	2.59529	2.54839	-0.0263084	0.364773	0.476675
ITIH4	0.304495	0.420939	0.467195	0.00393766	0.0212964	KIF1B	1.85106	2.17075	0.229844	0.000196039	0.00119526	GYG2	1.48668	1.86733	0.328882	0.000642704	0.0061392
ITIH1	0.160331	0.181265	0.177049	0.0527715	0.123581	FOXC1	2.68054	2.63465	-0.0249146	0.839584	0.864198	DCBLD2	2.63599	3.14581	0.255091	0.00761456	0.0341073
C4orf27	3.28269	3.32123	0.0168386	0.362693	0.468356	SYNE2	2.70886	2.69992	-0.0047693	0.442424	0.522333	SERPINB3	1.04551	1.31107	0.326528	0.420228	0.525016
ZFR	3.50714	3.48411	-0.00950782	0.863103	0.88579	PLEKHH1	1.75533	1.32568	-0.405005	0.00136121	0.00560083	SOAT1	3.43614	3.36746	-0.0291296	0.305355	0.423351
ZNF280C	0.830278	0.7893	-0.0730212	0.424889	0.522693	ATP9A	4.05759	4.12914	0.0252168	0.92709	0.939153	MSH4	0.059997	0.0891861	0.571928	0.0170426	0.0595663
NPFFR2	0.0429894	0.110901	1.36722	0.0543337	0.126495	CBLN4	0.246083	0.794713	1.69129	2.18215e-05	0.000208194	F7	0.125844	0.292981	1.21917	0.00692021	0.0319536
PHF21B	0.0620251	0.109217	0.816276	0.000598084	0.00629046	CHRDL2	0.784349	1.53497	0.968642	0.000309038	0.00171058	GDI2	5.86403	5.95153	0.0213696	0.200298	0.318713
TRAF1	1.73481	1.85976	0.100345	0.0568192	0.130157	FAM168A	2.93301	3.55896	0.279071	2.71916e-10	5.60459e-08	PRDM1	2.04203	2.53967	0.314643	2.43151e-05	0.000558634
RC3H2	2.27742	2.33036	0.0331495	0.302755	0.413051	RELT	1.41735	1.67876	0.244201	0.0196982	0.0468692	ATG5	3.151	3.2498	0.0445402	0.250847	0.369677
IL17RB	2.43804	2.31479	-0.0748406	0.379853	0.483679	GALC	2.94031	3.12841	0.0894611	0.243045	0.332964	TMCC3	2.1799	2.517	0.207444	0.00751168	0.033818
DCBLD2	2.84298	2.63599	-0.109062	0.544851	0.624999	NOP58	4.48812	4.2458	-0.0800761	0.00850023	0.024112	PITHD1	4.14688	4.26081	0.0391041	0.109531	0.211911
SERPINB3	1.5612	1.04551	-0.578448	0.166479	0.272968	SZRD1	4.45748	4.80992	0.109786	2.0901e-06	3.274e-05	MTA3	2.02255	2.12783	0.0732092	0.0375518	0.102593
SOAT1	2.9538	3.43614	0.218217	0.000342499	0.0044124	KCNH2	1.38266	1.8765	0.440591	0.0710452	0.128209	USP13	1.22902	1.50694	0.294115	4.42496e-05	0.000856409
PKP2	2.95418	2.67504	-0.143195	0.0239725	0.0721239	CUL1	4.17346	4.31216	0.0471671	0.0461795	0.091421	ATP11B	3.0009	3.21316	0.0985959	0.0146706	0.0538492
MSH4	0.0645479	0.059997	-0.105478	0.837883	0.865641	FAM114A2	1.70225	2.01856	0.245885	1.82915e-07	5.01005e-06	LAMC2	5.99396	6.10317	0.0260501	0.122221	0.228147
GDI2	5.98203	5.86403	-0.0287444	0.195253	0.305434	CYFIP2	1.68296	2.21759	0.397993	0.00432593	0.0140535	CDK14	2.65133	3.02302	0.189275	0.0100874	0.041542
PRDM1	1.92089	2.04203	0.0882224	0.236842	0.348802	TAB2	3.69391	4.00462	0.116518	0.000122769	0.000824307	SEC61A1	6.4519	6.42615	-0.00576976	0.782372	0.821204
TMCC3	1.8933	2.1799	0.20336	0.0202476	0.0642791	GINM1	4.19311	4.58909	0.130189	1.16809e-06	2.07604e-05	PPP1R12A	2.30269	2.67003	0.213536	7.18886e-05	0.00122969
MTA3	2.17364	2.02255	-0.103938	0.00730483	0.0320537	EIF2AK2	2.90183	3.06619	0.0794822	0.112083	0.183099	RASGRF1	0.5178	0.776044	0.583744	0.239719	0.358878
ATP11B	3.25301	3.0009	-0.116382	0.0133571	0.0484069	USP36	2.79118	2.92966	0.0698585	0.0259689	0.058144	CAMK2B	0.60219	0.967521	0.684074	0.55434	0.63618
LAMC2	6.77996	5.99396	-0.177769	0.00274094	0.0167415	KMT2C	2.1287	2.31251	0.119484	0.0525879	0.101451	POLR3E	2.25814	2.28472	0.0168874	0.74063	0.787471
CDK14	2.32747	2.65133	0.187955	0.0294528	0.0825779	MCOLN3	0.439629	0.728377	0.728397	0.0126712	0.033205	ATP2B4	4.00306	4.33402	0.114602	0.00131802	0.0101705
SEC61A1	6.46711	6.4519	-0.00339745	0.443742	0.539711	CCDC85A	0.134051	0.235184	0.811005	2.0901e-06	3.274e-05	ZC3H11A	3.69957	3.97659	0.104177	0.000173096	0.002326
PPP1R12A	2.27381	2.30269	0.0182106	0.513361	0.598954	PUM2	4.15343	4.24024	0.0298452	0.364537	0.45173	RIOK2	2.1141	2.22475	0.0735974	0.0306261	0.0889517
RASGRF1	0.358381	0.5178	0.530901	0.00446891	0.0231101	MRPL43	4.02327	3.75874	-0.0981186	3.15206e-05	0.000277866	NDC1	2.51398	2.5639	0.0283671	0.491988	0.584208
CAMK2B	0.426242	0.60219	0.498549	0.00573051	0.0272824	ITIH1	0.160331	0.28198	0.814541	0.792216	0.823462	DGKG	0.365801	0.444236	0.280269	0.223688	0.342689
CROCC	1.99571	2.13107	0.0946757	0.0993392	0.191104	C4orf27	3.28269	3.48297	0.0854378	0.000398534	0.00209659	FLYWCH1	2.33481	2.49661	0.0966652	0.148438	0.259919
POLR3E	2.46145	2.25814	-0.124373	0.000912567	0.0081847	ZFR	3.50714	3.72421	0.0866363	0.00652305	0.0195774	UNKL	1.22141	1.40501	0.202032	0.00793079	0.0350367
ATP2B4	4.09236	4.00306	-0.031831	0.176589	0.284504	ZNF280C	0.830278	0.953306	0.199345	0.0358063	0.0750659	TBXAS1	2.60456	2.50037	-0.0589033	0.49776	0.588968
ZC3H11A	4.00785	3.69957	-0.115472	0.000492879	0.00554484	NPFFR2	0.0429894	0.121031	1.49333	0.0170671	0.0418103	PARP12	3.38866	3.32823	-0.0259601	0.294709	0.413151
RIOK2	2.20228	2.1141	-0.0589553	0.0743583	0.156852	PHF21B	0.0620251	0.25928	2.06358	7.62173e-06	9.09465e-05	ALDH18A1	4.61983	4.64821	0.00883776	0.200298	0.318713
YIPF1	4.12213	4.00683	-0.040928	0.187084	0.296761	TRAF1	1.73481	2.15957	0.315968	0.000366311	0.00196128	TARBP1	2.29016	2.4889	0.12006	0.0531613	0.13028
NDC1	2.5923	2.51398	-0.0442564	0.685478	0.741783	RC3H2	2.27742	2.58109	0.180579	0.000104735	0.000723923	MXD1	2.88728	3.18364	0.140969	0.114686	0.218641
TBXAS1	2.79673	2.60456	-0.102699	0.393046	0.495646	IL17RB	2.43804	2.23451	-0.125761	0.0278817	0.0615417	CDK17	2.17445	2.56813	0.240064	2.48124e-05	0.000567679
PARP12	3.57448	3.38866	-0.0770165	0.192501	0.302627	TRAF3IP2	2.65337	2.54839	-0.0582354	0.394606	0.47996	DNAJC25	2.10784	2.26918	0.1064	0.00956749	0.0400085
ALDH18A1	4.87594	4.61983	-0.0778423	0.00992703	0.0393534	GYG2	1.52663	1.86733	0.29062	0.00697413	0.0206031	SLC2A3	2.97786	3.91868	0.396092	1.49697e-07	1.22376e-05
TARBP1	2.63061	2.29016	-0.199945	0.00481803	0.0243381	DCBLD2	2.84298	3.14581	0.146029	0.178664	0.263039	PSD	1.64831	2.18358	0.405708	0.00127673	0.00993878
GATB	1.06145	1.10996	0.0644788	0.184418	0.293732	SERPINB3	1.5612	1.31107	-0.251921	0.500361	0.574564	CTDP1	2.13964	2.17248	0.0219759	0.803488	0.838644
MXD1	3.51685	2.88728	-0.284573	0.00108286	0.00914579	SOAT1	2.9538	3.36746	0.189087	0.000522485	0.00261243	YBX3	4.3072	4.33331	0.00871856	0.201907	0.320491
DNAJC25	2.19508	2.10784	-0.0585027	0.230544	0.342533	PKP2	2.95418	2.48611	-0.248871	0.00191617	0.00735605	STYK1	1.7952	1.79302	-0.00174926	0.874835	0.896876
SLC2A3	3.18056	2.97786	-0.0950057	0.337879	0.445912	MSH4	0.0645479	0.0891861	0.46645	0.0619989	0.115506	WNK1	3.46393	3.65805	0.0786651	0.0072105	0.0328783
PSD	1.55426	1.64831	0.0847671	0.321957	0.430962	F7	0.14309	0.292981	1.03388	0.00130968	0.00543339	RPS17P5	0.097355	0.0676247	-0.525705	0.0641676	0.147622
CTDP1	2.08375	2.13964	0.0381858	0.149994	0.253276	GDI2	5.98203	5.95153	-0.00737481	0.733049	0.77315	CCAR1	3.27858	3.44312	0.0706468	0.0731219	0.161037
STYK1	2.58962	1.7952	-0.528598	1.7901e-06	0.000137862	PRDM1	1.92089	2.53967	0.402865	8.81349e-07	1.66781e-05	OGFR	3.78692	3.80785	0.00795098	0.929056	0.941501
RPS17P5	0.0775906	0.097355	0.327372	0.206695	0.317284	ATG5	3.15551	3.2498	0.042477	0.110837	0.18158	CREB3L3	0.844787	0.420626	-1.00605	0.0300999	0.0882357
CCAR1	3.40903	3.27858	-0.0562897	0.189778	0.299641	TMCC3	1.8933	2.517	0.410804	2.39158e-07	6.08514e-06	PIGV	2.46252	2.51758	0.0319004	0.266238	0.385207
OGFR	4.06982	3.78692	-0.10394	0.0374216	0.0969653	PITHD1	4.1427	4.26081	0.0405576	0.20706	0.294625	PTPRU	3.16633	3.45538	0.126033	0.0197622	0.0660333
GNA15	3.82552	3.31575	-0.206323	0.000767381	0.00728699	MTA3	2.17364	2.12783	-0.0307289	0.261419	0.352239	SNRNP40	2.9237	3.09655	0.0828643	0.0225717	0.0725525
CREB3L3	1.32529	0.844787	-0.649651	0.0392942	0.100541	USP13	1.23159	1.50694	0.2911	0.000254671	0.00146778	RIMBP2	0.51331	0.938861	0.871082	0.161689	0.275546
PIGV	2.478	2.46252	-0.00903981	0.837959	0.865641	LAMC2	6.77996	6.10317	-0.151719	0.109601	0.18006	COL11A1	2.99649	4.10341	0.453551	0.000986968	0.00827602
PTPRU	3.33956	3.16633	-0.0768471	0.18178	0.290707	CDK14	2.32747	3.02302	0.37723	2.07677e-05	0.00019973	QSER1	2.07032	2.19936	0.087234	0.210094	0.328516
SNRNP40	2.88053	2.9237	0.0214633	0.566364	0.642376	SEC61A1	6.46711	6.42615	-0.00916721	0.300992	0.391475	ACAA1	3.15901	3.02561	-0.0622448	0.0212543	0.0693931
RIMBP2	0.266703	0.51331	0.944597	9.87651e-05	0.00200806	PPP1R12A	2.27381	2.67003	0.231747	1.57822e-05	0.000160969	BCAT1	2.22372	2.15661	-0.0442049	0.486252	0.57976
COL11A1	3.20457	2.99649	-0.0968612	0.656249	0.717092	RASGRF1	0.358381	0.776044	1.11464	0.000555792	0.00275016	HDAC7	3.55974	3.78399	0.0881367	0.00645964	0.0304639
QSER1	2.07981	2.07032	-0.00660026	0.825447	0.855562	CAMK2B	0.426242	0.967521	1.18262	0.00685881	0.0203548	LZTS1	2.18918	2.56079	0.226198	0.0125886	0.0484475
MPC1	4.01642	4.003	-0.0048297	0.788189	0.824248	CROCC	1.99571	2.17179	0.121981	0.0290867	0.0637009	PRDM6	0.543085	0.708196	0.382971	0.000307083	0.00357559
ACAA1	3.17041	3.15901	-0.00519885	0.856803	0.880973	POLR3E	2.46145	2.28472	-0.107486	0.000579083	0.00283748	SPAG4	2.4271	2.26242	-0.101365	0.106527	0.207802
BCAT1	1.56731	2.22372	0.504687	4.09382e-05	0.00117261	ATP2B4	4.09236	4.33402	0.0827709	0.394606	0.47996	NCKAP1	3.10864	3.27531	0.0753478	0.0367217	0.10098
HDAC7	3.7729	3.55974	-0.0839024	0.0622375	0.138594	ZC3H11A	4.00785	3.97659	-0.0112954	0.435863	0.516502	MRPS35	4.83654	4.76948	-0.0201433	0.248968	0.367996
LZTS1	1.80232	2.18918	0.280539	0.0122042	0.0453639	YIPF1	4.12213	4.02169	-0.0355883	0.0792123	0.13964	GUCY1B3	2.64227	2.95386	0.160823	0.0324301	0.0925715
PRDM6	0.479443	0.543085	0.179818	0.218309	0.329698	DGKG	0.369134	0.444236	0.267182	0.197252	0.283912	SFSWAP	2.27104	2.43471	0.100398	0.0621643	0.144786
SPAG4	2.51746	2.4271	-0.0527361	0.673727	0.731758	FLYWCH1	2.41833	2.49661	0.0459618	0.15649	0.237119	TNK2	2.91774	3.11611	0.0948948	0.175815	0.291368
NCKAP1	3.22342	3.10864	-0.0523087	0.122635	0.220957	UNKL	1.24876	1.40501	0.170088	0.0334326	0.0710619	MON2	1.74987	1.99369	0.188191	0.00078471	0.00704592
MRPS35	5.21748	4.83654	-0.10938	0.000284573	0.00391705	TBXAS1	2.79673	2.50037	-0.161602	0.132142	0.208163	CDH3	3.58587	3.78766	0.0789844	0.181716	0.29776
GUCY1B3	2.32195	2.64227	0.186446	0.0277055	0.0793013	PARP12	3.57448	3.32823	-0.102977	0.032074	0.0688587	ARSF	0.0361707	0.0480124	0.408584	0.384503	0.494088
SFSWAP	2.42334	2.27104	-0.093643	0.0913796	0.180589	ALDH18A1	4.87594	4.64821	-0.0690046	0.0870981	0.15037	GPBP1	3.66998	3.89549	0.086033	0.0031131	0.0183859
TNK2	3.29678	2.91774	-0.176206	0.0312941	0.086015	TARBP1	2.63061	2.4889	-0.0798854	0.164758	0.24684	DGAT2	1.24596	1.37401	0.141128	0.167233	0.281785
MON2	1.79295	1.74987	-0.0350824	0.593815	0.665438	GATB	1.06145	1.11541	0.0715379	0.180462	0.265079	CS	4.14071	4.22283	0.0283334	0.355189	0.467497
CDH3	4.09173	3.58587	-0.190388	0.0061672	0.0285731	MXD1	3.51685	3.18364	-0.143603	0.030763	0.0666283	MRPS24	1.84296	1.65849	-0.15215	0.161689	0.275546
ARSF	0.0198921	0.0361707	0.862627	0.173882	0.281492	CDK17	2.1537	2.56813	0.2539	3.31563e-06	4.67715e-05	ELMO2	2.70241	2.94836	0.125666	5.70391e-05	0.00103586
GPBP1	3.89078	3.66998	-0.084285	0.00193751	0.0132986	DNAJC25	2.19508	2.26918	0.0478976	0.3587	0.446311	WAPAL	3.12429	3.1921	0.0309799	0.477717	0.5728
DGAT2	1.51086	1.24596	-0.278105	0.0282778	0.0804205	SLC2A3	3.18056	3.91868	0.301086	0.000382105	0.00202905	VMP1	4.96656	5.29844	0.0933195	0.0174783	0.0605745
ZNF112	1.16405	1.15681	-0.00901061	0.794368	0.829654	PSD	1.55426	2.18358	0.490475	0.000200392	0.00121585	APPBP2	2.14712	2.33091	0.118492	0.0266445	0.0814018
CS	4.21068	4.14071	-0.0241769	0.246514	0.358058	CTDP1	2.08375	2.17248	0.0601617	0.0474058	0.0933583	POLD1	2.34167	2.41005	0.0415295	0.669452	0.729202
LTK	1.42727	0.935965	-0.608735	0.00803634	0.0341227	STYK1	2.58962	1.79302	-0.530348	1.20126e-06	2.11531e-05	SEZ6	0.246126	0.619286	1.33121	0.164444	0.278507
MRPS24	1.92756	1.84296	-0.0647539	0.727194	0.775785	WNK1	3.45653	3.65805	0.081751	0.0553516	0.105567	EIF4B	5.6825	5.74035	0.0146131	0.575951	0.654074
ELMO2	2.59398	2.70241	0.0590765	0.0883429	0.176433	CCAR1	3.40903	3.44312	0.0143571	0.922684	0.935914	GLTSCR1	1.66127	1.78963	0.107374	0.0831465	0.175576
WAPAL	3.16631	3.12429	-0.0192746	0.952037	0.961218	OGFR	4.06982	3.80785	-0.0959887	0.0221561	0.0514028	SPHK2	1.87859	1.80786	-0.0553702	0.362362	0.474452
VMP1	5.75019	4.96656	-0.211361	2.88552e-05	0.00091047	GNA15	3.82552	3.38505	-0.176482	0.00757728	0.0219993	RPL18	7.32966	7.17399	-0.0309694	0.0753428	0.164331
APPBP2	2.05579	2.14712	0.0627077	0.130603	0.230632	CREB3L3	1.32529	0.420626	-1.6557	5.79909e-05	0.000452585	CA11	2.49708	2.59512	0.0555607	0.666129	0.726595
POLD1	2.49268	2.34167	-0.0901623	0.306534	0.416802	PTPRU	3.33956	3.45538	0.0491862	0.80078	0.830973	ISOC2	3.36596	3.2896	-0.0331031	0.343435	0.457168
SEZ6	0.151853	0.246126	0.696721	0.000375416	0.00467931	SNRNP40	2.88053	3.09655	0.104328	0.00620215	0.0188093	U2AF2	5.06629	5.27331	0.0577791	0.0414878	0.109883
EIF4B	5.57125	5.6825	0.0285232	0.174035	0.281492	RIMBP2	0.266703	0.938861	1.81568	1.13573e-05	0.000124193	EPN1	3.46281	3.20775	-0.11038	0.00654949	0.0307552
SLC6A16	0.350791	0.584989	0.737796	1.08825e-05	0.000485217	COL11A1	3.20457	4.10341	0.35669	0.0134849	0.034872	MED29	4.09923	4.37883	0.0951947	0.0135944	0.0510836
GLTSCR1	1.83437	1.66127	-0.142997	0.0656889	0.143828	QSER1	2.07981	2.19936	0.0806337	0.209063	0.296902	AHRR	0.340496	0.382991	0.169669	0.0608955	0.142708
RPL18	7.50991	7.32966	-0.0350491	0.314183	0.424109	MPC1	4.01642	3.96323	-0.0192353	0.565968	0.631056	ZNF275	2.08798	2.39832	0.199915	0.000516064	0.00521125
CA11	2.24186	2.49708	0.155542	0.060021	0.135177	ACAA1	3.17041	3.02561	-0.0674436	0.0162104	0.0402032	MTMR1	2.45238	2.54711	0.0546761	0.236088	0.35517
ISOC2	3.6356	3.36596	-0.111178	0.0480555	0.115924	BCAT1	1.56731	2.15661	0.460482	5.79408e-06	7.22684e-05	GPC1	4.07667	4.16866	0.0321908	0.397022	0.504891
U2AF2	5.25076	5.06629	-0.0515966	0.0332333	0.0895059	HDAC7	3.7729	3.78399	0.0042343	0.92709	0.939153	ADCK1	1.44182	1.4466	0.00477931	0.636528	0.7031
EPN1	3.58993	3.46281	-0.052012	0.50308	0.590036	LZTS1	1.80232	2.56079	0.506737	1.06226e-07	3.35542e-06	HAGH	2.72251	2.75851	0.0189507	0.983608	0.98667
AHRR	0.373699	0.340496	-0.134236	0.26668	0.378481	PRDM6	0.479443	0.708196	0.562789	6.77963e-06	8.20949e-05	RNF4	3.22	3.43644	0.0938548	0.00166917	0.0119979
ZNF275	1.94798	2.08798	0.100127	0.0374216	0.0969653	SPAG4	2.51746	2.26242	-0.154101	0.0505917	0.0984186	CASP8	2.295	2.38283	0.0541821	0.153636	0.265992
MTMR1	2.55002	2.45238	-0.056326	0.259836	0.371558	MRPS35	5.21748	4.76948	-0.129524	5.2687e-07	1.11896e-05	LIMCH1	1.93301	2.28024	0.238335	0.0313371	0.0904127
GPC1	4.06854	4.07667	0.00288174	0.93927	0.950249	GUCY1B3	2.32195	2.95386	0.347269	1.16505e-05	0.000126578	ASUN	2.76015	2.85151	0.0469756	0.325152	0.440997
ADCK1	1.46146	1.44182	-0.0195234	0.932891	0.945198	TNK2	3.29678	3.11611	-0.0813107	0.178664	0.263039	TM7SF3	4.22687	4.02109	-0.0720055	0.0220364	0.0711662
HAGH	2.81025	2.72251	-0.0457593	0.0527725	0.123581	MON2	1.79295	1.99369	0.153109	0.0393699	0.0807459	DLX3	0.284884	0.227846	-0.322312	0.193954	0.311608
RNF4	3.24235	3.22	-0.00998034	0.616205	0.684003	CDH3	4.09173	3.78766	-0.111403	0.143921	0.222331	SPA17	1.34278	1.33831	-0.00481559	0.247098	0.366182
CASP8	2.55986	2.295	-0.157569	0.00060702	0.00632024	ARSF	0.0198921	0.0480124	1.27121	0.0207372	0.0487663	WISP2	0.774562	1.2268	0.663441	0.0023416	0.0151278
LIMCH1	1.89918	1.93301	0.0254761	0.513361	0.598954	DGAT2	1.51086	1.37401	-0.136977	0.169874	0.252904	DMRT3	0.0514173	0.0827743	0.68693	0.00014833	0.00208209
ASUN	2.88823	2.76015	-0.0654384	0.145506	0.248261	LTK	1.42727	0.851689	-0.744863	0.000902703	0.0040524	ST3GAL6	1.19648	1.31509	0.136355	0.350457	0.463698
TSPAN32	0.420586	0.510176	0.278594	0.206547	0.317109	MRPS24	1.92756	1.65849	-0.216904	0.0811271	0.142185	NGFR	2.55461	2.95681	0.210936	0.0688407	0.154518
WISP2	0.517086	0.774562	0.582977	0.0271433	0.0782206	ELMO2	2.59398	2.94836	0.184743	9.1185e-08	3.00282e-06	CDON	0.918207	1.28302	0.482652	0.000146784	0.00206251
ST3GAL6	1.06701	1.19648	0.165235	0.0993392	0.191104	WAPAL	3.16631	3.1921	0.0117052	0.58488	0.646557	TAF2	2.25119	2.4488	0.121388	0.0285756	0.0851547
ATP2C2	2.32082	1.66221	-0.481531	5.77251e-05	0.00143446	VMP1	5.75019	5.29844	-0.118041	0.00733062	0.0214046	MEF2BNB-MEF2B	0.316851	0.394672	0.316851	0.000924745	0.00792895
NGFR	1.72337	2.55461	0.567874	0.000105507	0.00210081	APPBP2	2.05579	2.33091	0.1812	0.000140518	0.000919559	RFXANK	3.8419	3.81612	-0.00971108	0.775367	0.815602
CDON	0.710719	0.918207	0.369539	0.0119302	0.0446898	POLD1	2.49268	2.41005	-0.0486327	0.350055	0.438257	LPAR2	3.24424	2.88254	-0.170543	0.0195227	0.0654164
TAF2	2.25863	2.25119	-0.00476334	0.958426	0.966272	SEZ6	0.151853	0.619286	2.02793	3.07627e-05	0.000273126	CTSA	5.09725	5.29786	0.0556902	0.0433462	0.11312
HIPK2	2.20827	2.48638	0.171125	0.0146052	0.0514688	EIF4B	5.57125	5.74035	0.0431363	0.0727978	0.13082	SUGP2	2.39906	2.87321	0.260196	4.06828e-07	2.65271e-05
TNPO3	3.84599	3.72394	-0.0465259	0.256459	0.368313	SLC6A16	0.350791	0.593294	0.758133	0.00382575	0.012748	SLC12A2	3.41406	3.211	-0.0884665	0.480553	0.575068
MEF2BNB-MEF2B	0.377213	0.316851	-0.251575	0.0215807	0.0671089	SPHK2	1.88079	1.80786	-0.057057	0.581074	0.643193	SNX24	2.07132	2.2383	0.111848	0.0414878	0.109883
RFXANK	4.16239	3.8419	-0.115594	0.0028886	0.0173254	RPL18	7.50991	7.17399	-0.0660185	0.00863998	0.024419	EYA2	1.97271	1.74741	-0.174965	0.21176	0.330404
TMEM161A	3.32692	3.06837	-0.116715	0.0103975	0.0406024	CA11	2.24186	2.59512	0.211102	0.0228108	0.0525725	CNN2	5.56599	5.83171	0.06728	0.000561734	0.00552971
LPAR2	3.82593	3.24424	-0.237929	4.40437e-06	0.000255453	ISOC2	3.6356	3.2896	-0.144281	0.000544476	0.00270257	ABCA7	2.22961	2.40007	0.106285	0.187762	0.304986
CTSA	5.30015	5.09725	-0.0563139	0.12657	0.225749	EPN1	3.58993	3.20775	-0.162392	0.000265914	0.00151913	SNCAIP	0.635125	0.985972	0.634507	0.000524911	0.00526758
SUGP2	2.64234	2.39906	-0.139349	0.00631929	0.029061	MED29	4.15426	4.37883	0.0759566	0.0343654	0.0726887	DDX20	1.62906	1.76166	0.112893	0.0188191	0.0637059
SLC12A2	3.61458	3.41406	-0.0823384	0.263243	0.374991	AHRR	0.373699	0.382991	0.0354338	0.615736	0.673571	BTBD1	3.88439	4.13939	0.0917294	0.000698689	0.00651936
CNN2	5.76197	5.56599	-0.0499238	0.147737	0.250767	ZNF275	1.94798	2.39832	0.300042	4.69332e-07	1.02722e-05	FAR2	1.63468	1.5558	-0.0713552	0.817647	0.850472
ABCA7	2.62188	2.22961	-0.233807	0.00601841	0.0281309	GPC1	4.06854	4.16866	0.0350726	0.476064	0.553024	BCAS1	2.84014	2.59376	-0.130915	0.379448	0.489361
SNCAIP	0.61645	0.635125	0.0430552	0.287954	0.398951	ADCK1	1.46146	1.4466	-0.0147441	0.72056	0.762531	POU1F1	0.053542	0.0581204	0.118373	0.453602	0.553506
DDX20	1.53046	1.62906	0.0900781	0.1433	0.245683	HAGH	2.81025	2.75851	-0.0268087	0.0754928	0.134365	SBNO2	4.09564	4.32037	0.0770638	0.0783894	0.168758
FAR2	1.84113	1.63468	-0.171582	0.116912	0.21418	RNF4	3.24235	3.43644	0.0838744	0.0241707	0.0549857	PMS1	1.624	1.78668	0.137731	0.00554207	0.027278
BCAS1	3.68478	2.84014	-0.375615	0.00481803	0.0243381	CASP8	2.55986	2.38283	-0.103387	0.0208957	0.0490424	HMG20B	4.02766	3.95738	-0.0253961	0.379448	0.489361
POU1F1	0.0633745	0.053542	-0.243231	0.392631	0.495646	LIMCH1	1.89918	2.28024	0.263811	0.00878178	0.0247271	CALCRL	2.40848	2.67611	0.152013	0.110547	0.21332
CHI3L2	0.773572	0.961102	0.313154	0.0537609	0.125349	ASUN	2.88823	2.85151	-0.0184627	0.426128	0.50789	TAF11	3.90354	4.16987	0.0952184	0.000621501	0.00597208
SBNO2	4.45401	4.09564	-0.121016	0.0061672	0.0285731	TM7SF3	4.28385	4.02109	-0.0913238	0.0290867	0.0637009	ANKS1A	2.85517	3.05098	0.095695	0.0428752	0.112233
PMS1	1.68616	1.624	-0.0541941	0.487863	0.577544	SPA17	1.42163	1.33831	-0.0871374	0.0532678	0.102472	AP3D1	4.2792	4.33313	0.0180682	0.68952	0.745105
HMG20B	4.36623	4.02766	-0.116449	0.0103975	0.0406024	TSPAN32	0.420586	0.588782	0.485334	0.136468	0.213406	ZNF76	2.32008	2.49113	0.102624	0.0328016	0.0931466
CALCRL	1.81927	2.40848	0.404761	0.00131849	0.0103307	WISP2	0.517086	1.2268	1.24642	1.92494e-06	3.07239e-05	NTHL1	2.88683	2.7985	-0.044831	0.364773	0.476675
TAF11	4.08972	3.90354	-0.0672189	0.0271433	0.0782206	DMRT3	0.0465386	0.0827743	0.830754	0.0310079	0.0670927	UHRF1BP1	1.52661	1.65017	0.11228	0.228944	0.348016
AP3D1	4.34664	4.2792	-0.0225604	0.154588	0.259015	ST3GAL6	1.06701	1.31509	0.30159	0.0147925	0.0374584	GNAI3	2.0382	2.19974	0.110038	0.00393544	0.0215767
ZNF76	2.40297	2.32008	-0.0506401	0.270149	0.381582	ATP2C2	2.32082	1.62759	-0.511898	6.15189e-05	0.00047354	IPO5	3.69702	3.78605	0.0343329	0.170058	0.285036
SLC9A3R2	5.18925	4.6956	-0.144219	0.00139403	0.0107035	NGFR	1.72337	2.95681	0.778809	2.20768e-06	3.41708e-05	OAT	4.41529	4.54811	0.0427611	0.208438	0.326897
NTHL1	3.30353	2.88683	-0.194521	0.00663364	0.0300227	CDON	0.710719	1.28302	0.852192	2.02712e-08	9.97886e-07	WDR3	1.95609	2.05742	0.0728665	0.220232	0.33914
UHRF1BP1	1.38658	1.52661	0.138802	0.039679	0.101008	TAF2	2.25863	2.4488	0.116624	0.0532678	0.102472	PKN2	3.03021	3.21444	0.0851494	0.131301	0.239338
GNAI3	2.0407	2.0382	-0.00177118	0.977607	0.981504	HIPK2	2.20827	2.55408	0.209883	0.00967709	0.0267537	TRAM2	3.08249	3.52065	0.191747	0.000353287	0.00397989
IPO5	3.64544	3.69702	0.020269	0.333852	0.442016	TNPO3	3.84599	3.81516	-0.0116125	0.350055	0.438257	GLP2R	1.01253	1.09153	0.108394	0.730308	0.779431
OAT	4.50659	4.41529	-0.0295293	0.438984	0.535742	RFXANK	4.16239	3.81612	-0.125305	0.000122769	0.000824307	MCM10	0.663467	0.685138	0.0463704	0.71662	0.768146
PKN2	3.13096	3.03021	-0.047187	0.233678	0.345847	TMEM161A	3.32692	3.04351	-0.128448	0.00222404	0.00826227	DGKA	2.4791	2.84452	0.198371	0.00260275	0.016244
WDR18	3.8928	3.71591	-0.0670916	0.115052	0.211869	LPAR2	3.82593	2.88254	-0.408472	7.61046e-11	2.69185e-08	ERBB3	4.65769	4.19291	-0.151662	0.0285756	0.0851547
TRAM2	2.94642	3.08249	0.0651329	0.259836	0.371558	SUGP2	2.64234	2.87321	0.120847	0.0850696	0.147765	ROPN1	0.0137619	0.00674251	-1.02933	0.0376512	0.102834
NTN1	1.38867	1.46947	0.0815992	0.189778	0.299641	SLC12A2	3.61458	3.211	-0.170805	0.0282785	0.0622593	ANKRD44	1.13074	1.41832	0.326917	0.0392601	0.105971
GLP2R	0.644868	1.01253	0.650888	0.000539099	0.00586194	SNX24	2.12379	2.2383	0.0757619	0.261419	0.352239	KARS	5.0706	5.05869	-0.00339325	0.82475	0.856072
MCM10	0.799569	0.663467	-0.269199	0.0260483	0.0761962	EYA2	1.83609	1.74741	-0.0714203	0.615736	0.673571	ADAT1	2.29889	2.50134	0.121766	0.00140431	0.0106327
DGKA	2.8847	2.4791	-0.218607	0.00169094	0.0121835	CNN2	5.76197	5.83171	0.0173562	0.102413	0.17055	PDIA5	3.41468	3.33507	-0.034036	0.652906	0.715906
ERBB3	5.11368	4.65769	-0.134748	0.00143328	0.010903	ABCA7	2.62188	2.40007	-0.127522	0.105959	0.175262	TBC1D22B	2.59897	2.69416	0.0518997	0.230716	0.349835
ROPN1	0.00985549	0.0137619	0.481684	0.339214	0.447378	SNCAIP	0.61645	0.985972	0.677562	9.12973e-05	0.000647924	NDUFB4	5.19185	5.23756	0.012646	0.757938	0.801424
ANKRD44	0.899904	1.13074	0.329418	0.00925683	0.0374778	DDX20	1.53046	1.76166	0.202971	0.000501324	0.00252158	SPEN	2.86895	3.06065	0.0933121	0.0339382	0.0955713
KARS	5.25091	5.0706	-0.0504109	0.00992703	0.0393534	BTBD1	3.88795	4.13939	0.0904089	0.000329455	0.00180131	MYLK	2.34636	2.93551	0.323188	0.00114146	0.00918598
ADAT1	2.3588	2.29889	-0.0371173	0.424889	0.522693	FAR2	1.84113	1.5558	-0.242937	0.0486593	0.0953484	ZC3H15	4.23647	4.36318	0.042518	0.0351082	0.0978499
PDIA5	3.33733	3.41468	0.0330553	0.16901	0.275951	BCAS1	3.68478	2.59376	-0.506531	1.70152e-05	0.000170688	MAP2K4	2.33116	2.51095	0.10718	0.0104937	0.0426402
TBC1D22B	2.67067	2.59897	-0.0392646	0.350147	0.457053	POU1F1	0.0633745	0.0581204	-0.124858	0.809249	0.838302	TMEM206	1.72235	1.97186	0.19518	3.86919e-06	0.000142805
NDUFB4	5.42652	5.19185	-0.0637773	0.0094756	0.0381096	CHI3L2	0.773572	1.11156	0.522976	0.0343654	0.0726887	SNAP91	0.418973	0.821509	0.971419	0.00761456	0.0341073
SPEN	2.75463	2.86895	0.0586679	0.18178	0.290707	SBNO2	4.45401	4.32037	-0.0439521	0.225598	0.314718	SLK	3.8482	3.9181	0.0259734	0.296818	0.415257
MYLK	2.03455	2.34636	0.205716	0.0680763	0.147553	PMS1	1.68616	1.78668	0.0835365	0.0891655	0.15319	CYB5R4	1.44808	1.62626	0.167418	0.0081481	0.035703
ZC3H15	4.38493	4.23647	-0.0496914	0.0453992	0.111234	HMG20B	4.36623	3.95738	-0.141845	0.000109615	0.000752026	GSTO2	1.72497	1.53519	-0.168149	0.0282456	0.0845762
MAP2K4	2.24907	2.33116	0.0517189	0.166538	0.272968	CALCRL	1.81927	2.67611	0.556775	3.11941e-07	7.51648e-06	SEC61A2	1.13934	1.42284	0.320577	3.15873e-05	0.000674767
TMEM206	1.80825	1.72235	-0.0702165	0.138967	0.240524	TAF11	4.08972	4.16987	0.0279995	0.370433	0.457493	TLE2	3.10698	3.11314	0.00285607	0.983608	0.98667
SNAP91	0.217077	0.418973	0.948653	7.43901e-05	0.00168803	ANKS1A	2.85383	3.05098	0.0963759	0.129317	0.204511	ASB1	2.10762	2.43341	0.207363	3.86919e-06	0.000142805
SLK	4.30648	3.8482	-0.162328	0.00135578	0.0105021	AP3D1	4.34664	4.33313	-0.00449219	0.232032	0.321503	FAM107B	3.94092	3.80744	-0.0497108	0.389431	0.498479
CYB5R4	1.3863	1.44808	0.0629029	0.20368	0.314226	ZNF76	2.40297	2.49113	0.0519838	0.350055	0.438257	ME1	2.06392	2.17699	0.0769477	0.325152	0.440997
COL17A1	5.26177	4.1547	-0.340806	0.00337621	0.0192231	SLC9A3R2	5.18925	4.74189	-0.130066	9.77985e-05	0.000684733	TBC1D1	3.29994	3.42389	0.0531964	0.100715	0.200056
GSTO2	1.99886	1.72497	-0.212607	0.00296513	0.0176153	NTHL1	3.30353	2.7985	-0.239352	4.63201e-05	0.00037938	CDK13	2.64353	2.85354	0.110285	0.00147241	0.0109843
SEC61A2	1.32984	1.13934	-0.223058	0.00320592	0.018529	UHRF1BP1	1.38658	1.65017	0.251081	0.000315709	0.00174044	MTHFD2	3.32236	3.37906	0.0244132	0.118946	0.223895
PRKCQ	0.685139	1.08516	0.663434	0.000183122	0.00297637	GNAI3	2.0407	2.19974	0.108267	0.0271025	0.0601694	SLC9A7	1.89814	2.1898	0.20621	0.00461036	0.0240723
TLE2	2.7915	3.10698	0.154475	0.0260483	0.0761962	IPO5	3.64544	3.78605	0.0546018	0.0290867	0.0637009	FOXJ2	2.70631	2.84137	0.0702616	0.0225717	0.0725525
ASB1	2.17937	2.10762	-0.0482973	0.550191	0.629446	WDR3	2.03107	2.05742	0.0185949	0.256738	0.34732	YBX1	7.31441	7.4023	0.0172313	0.0898503	0.185359
FAM107B	4.00171	3.94092	-0.0220856	0.443742	0.539711	WDR18	3.8928	3.64012	-0.09682	0.0134851	0.034872	PDE4A	2.55049	2.64951	0.0549511	0.124444	0.230817
ME1	1.98321	2.06392	0.0575529	0.434256	0.531643	TRAM2	2.94642	3.52065	0.25688	1.63143e-06	2.70802e-05	PPP2R5A	4.18923	4.15367	-0.0122977	0.425608	0.529733
MTHFD2	3.33206	3.32236	-0.0042056	0.920148	0.934556	NTN1	1.38867	1.58676	0.192389	0.217217	0.305632	ELAVL1	3.3929	3.50276	0.0459746	0.284315	0.403057
FOXJ2	2.75972	2.70631	-0.0281941	0.727194	0.775785	GLP2R	0.644868	1.09153	0.759281	0.00320208	0.0110476	TIE1	2.43624	2.75061	0.175097	0.00365941	0.0205404
YBX1	7.29953	7.31441	0.00293886	0.93927	0.950249	MCM10	0.799569	0.685138	-0.222828	0.0449801	0.0895601	DIP2B	2.55817	2.85381	0.157776	0.00164332	0.0118587
PDE4A	2.75369	2.55049	-0.110593	0.0404567	0.102437	DGKA	2.8847	2.84452	-0.0202359	0.268551	0.359331	SMARCD1	3.36389	3.49098	0.0535028	0.248968	0.367996
PPP2R5A	4.42896	4.18923	-0.080283	0.0185823	0.0606026	ERBB3	5.11368	4.19291	-0.28641	1.67716e-06	2.76312e-05	KDM4A	3.13942	3.16716	0.0126927	0.929056	0.941501
CTNNA2	0.199321	0.237513	0.252913	4.32013e-06	0.000252664	ROPN1	0.00985549	0.00674251	-0.547642	0.456253	0.535876	ZMYND12	0.865466	0.810597	-0.0944922	0.0881349	0.182853
ELAVL1	3.55797	3.3929	-0.0685355	0.00587287	0.0277334	ANKRD44	0.899904	1.41832	0.656335	8.34544e-06	9.71544e-05	SLC9A3	1.65297	1.41478	-0.224483	0.189297	0.306515
TIE1	2.00588	2.43624	0.280424	0.000966361	0.00849279	KARS	5.25091	5.05869	-0.0538042	0.00167942	0.00662565	NGEF	2.31827	2.00365	-0.210414	0.0424084	0.11147
DIP2B	2.77425	2.55817	-0.116984	0.0211281	0.0662022	ADAT1	2.3588	2.50134	0.084649	0.0505917	0.0984186	ASPM	0.963366	1.02912	0.0952579	0.331933	0.446918
SMARCD1	3.47703	3.36389	-0.0477271	0.18178	0.290707	TBC1D22B	2.67067	2.69416	0.0126351	0.891921	0.908925	CD84	1.51289	1.66382	0.137195	0.234288	0.353335
KDM4A	2.92974	3.13942	0.0997222	0.0381616	0.0982273	NDUFB4	5.42652	5.23756	-0.0511313	0.00410472	0.0134739	ELOVL1	5.35784	5.36923	0.00306612	0.896468	0.914193
NFYC	2.87544	3.04337	0.0818866	0.0680763	0.147553	SPEN	2.75463	3.06065	0.15198	0.00105718	0.00460868	ZNRD1	2.46002	2.48427	0.0141469	0.420323	0.525016
ZMYND12	0.726822	0.865466	0.251874	0.0381616	0.0982273	MYLK	2.03455	2.93551	0.528903	1.03037e-07	3.28732e-06	MPPED2	0.354607	0.409032	0.20599	0.892857	0.911448
SLC9A3	2.38685	1.65297	-0.530048	0.0239725	0.0721239	ZC3H15	4.38493	4.36318	-0.00717337	0.600218	0.659871	CLDN18	5.34219	4.02222	-0.409441	0.00382279	0.0211627
NGEF	2.87311	2.31827	-0.309566	0.000767381	0.00728699	MAP2K4	2.24907	2.51095	0.158899	0.00034376	0.00186494	ZBTB11	1.94551	2.19316	0.172865	0.00125654	0.00982067
ASPM	1.22058	0.963366	-0.341407	0.0103975	0.0406024	TMEM206	1.80825	1.97186	0.124964	0.00432593	0.0140535	ATXN3	0.867978	0.941313	0.117016	0.0359072	0.0994694
CD84	0.95438	1.51289	0.664672	0.000293543	0.00399527	SNAP91	0.217077	0.821509	1.92007	3.26715e-08	1.4097e-06	GOLGA5	4.15446	4.34492	0.0646697	0.0078241	0.0347166
ELOVL1	5.62129	5.35784	-0.0692515	0.0312941	0.086015	SLK	4.30648	3.9181	-0.136355	0.00303392	0.0105706	FGFR2	2.71893	1.93865	-0.487985	4.44761e-08	4.72101e-06
SPI1	3.23871	3.77903	0.222597	0.00969897	0.0387405	CYB5R4	1.3863	1.62626	0.230321	2.93012e-05	0.000263242	LRRC40	2.09279	2.42962	0.215307	0.000252733	0.00309127
ZNRD1	2.81817	2.46002	-0.196085	0.00266973	0.0164394	COL17A1	5.26177	4.23616	-0.312792	0.00721002	0.0211278	ISOC1	3.40359	3.37044	-0.0141181	0.483398	0.577287
MPPED2	0.206498	0.354607	0.780097	4.75567e-06	0.000266967	GSTO2	1.99886	1.53519	-0.380756	1.39144e-05	0.000145865	EML1	1.38385	1.69626	0.293671	0.00197933	0.0134807
CLDN18	6.18955	5.34219	-0.212402	0.0680763	0.147553	SEC61A2	1.32984	1.42284	0.0975197	0.306205	0.396617	TRMT11	2.34843	2.51577	0.0993058	0.0428752	0.112233
ATXN3	0.868564	0.867978	-0.00097303	0.93927	0.950249	PRKCQ	0.685139	1.18523	0.790703	6.00909e-05	0.000464295	THUMPD1	3.33615	3.4112	0.0320933	0.636528	0.7031
GOLGA5	4.31488	4.15446	-0.0546595	0.0306697	0.0848577	TLE2	2.7915	3.11314	0.157331	0.0271025	0.0601694	MSANTD3	2.72344	3.03487	0.156208	1.86541e-05	0.00045776
FGFR2	2.31769	2.71893	0.230355	0.00346441	0.0195659	ASB1	2.17937	2.43341	0.159066	0.0003025	0.00168252	KIF26A	0.933311	0.847005	-0.139987	0.11364	0.217313
LRRC40	2.06267	2.09279	0.0209137	0.472899	0.564418	FAM107B	4.00171	3.80744	-0.0717964	0.112083	0.183099	ATG2B	1.83611	1.93837	0.07819	0.362362	0.474452
ISOC1	3.43044	3.40359	-0.0113356	0.627537	0.693388	ME1	1.98321	2.17699	0.134501	0.135014	0.211675	ARFGEF1	2.89968	3.0066	0.0522407	0.348107	0.461636
EML1	1.02743	1.38385	0.429645	0.000312281	0.00415523	TBC1D1	3.30548	3.42389	0.0507793	0.140904	0.218707	ACSM2B	0.0258445	0.0144712	-0.836671	0.00120306	0.00956097
TRMT11	2.58572	2.34843	-0.138872	0.0146052	0.0514688	CDK13	2.71708	2.85354	0.0706963	0.0467893	0.0924237	ZFAT	1.05015	1.10891	0.0785498	0.341114	0.455096
THUMPD1	3.30268	3.33615	0.0145494	0.438984	0.535742	MTHFD2	3.33206	3.37906	0.0202076	0.266159	0.357081	MTFR1	2.42296	2.46823	0.0267094	0.636528	0.7031
MSANTD3	2.86721	2.72344	-0.0742214	0.138967	0.240524	SLC9A7	1.96047	2.1898	0.159602	0.0553516	0.105567	FECH	2.18078	2.27065	0.0582595	0.221955	0.340854
KIF26A	0.513453	0.933311	0.862125	1.86283e-06	0.000139618	FOXJ2	2.75972	2.84137	0.0420675	0.076409	0.135709	MYO9A	1.08808	1.32937	0.288958	3.35374e-05	0.000703258
ATG2B	1.68462	1.83611	0.124236	0.0345825	0.09197	YBX1	7.29953	7.4023	0.0201702	0.0989627	0.16599	DDX3Y	1.36326	1.74686	0.357707	0.0756298	0.164891
ARFGEF1	2.99845	2.89968	-0.0483242	0.492908	0.581398	PDE4A	2.75369	2.64951	-0.0556419	0.361611	0.4489	IDI1	3.80402	3.93379	0.0483953	0.232497	0.351643
ACSM2B	0.0170943	0.0258445	0.596339	9.37098e-05	0.0019565	PPP2R5A	4.42896	4.15367	-0.0925807	0.00101642	0.0044677	SP100	2.89604	3.02717	0.0638894	0.0831465	0.175576
ZFAT	0.995112	1.05015	0.0776634	0.443742	0.539711	CTNNA2	0.199321	0.298011	0.580273	0.000257433	0.0014825	KLF6	4.9777	5.47785	0.138131	4.13278e-06	0.000149118
MTFR1	2.56377	2.42296	-0.0814997	0.128574	0.228188	ELAVL1	3.55797	3.50276	-0.0225609	0.00921974	0.0256976	PPAP2A	4.15971	4.4091	0.0840014	0.0107726	0.0433755
STAG3	0.543647	0.774137	0.50992	0.00164524	0.0119808	TIE1	2.00588	2.75061	0.455521	1.0951e-07	3.42891e-06	TRAM1	6.07035	6.14217	0.0169672	0.630026	0.697804
FECH	1.84106	2.18078	0.244306	8.64833e-05	0.00185409	KDM4A	2.92974	3.16716	0.112415	0.00471874	0.0151019	PHKA1	1.4717	1.55722	0.0814865	0.290521	0.408955
MYO9A	1.03863	1.08808	0.0671107	0.346026	0.453241	NFYC	2.87544	3.0065	0.0642985	0.127922	0.20282	TNFRSF1A	5.40065	5.477	0.0202551	0.472073	0.568347
DDX3Y	1.74971	1.36326	-0.360058	0.119875	0.218249	ZMYND12	0.726822	0.810597	0.157381	0.298407	0.388837	CACNB1	1.24329	1.52722	0.296746	0.0028053	0.0170724
PFKP	5.29647	4.76436	-0.152749	0.000523261	0.00576252	SLC9A3	2.38685	1.41478	-0.754531	0.000171727	0.001074	EVI5	1.95552	2.12182	0.117749	0.0176958	0.0611271
IDI1	4.09539	3.80402	-0.106479	0.0255153	0.0751798	NGEF	2.87311	2.00365	-0.519979	9.40179e-08	3.08547e-06	STOML1	1.67897	1.64433	-0.0300766	0.276181	0.395043
SP100	3.01441	2.89604	-0.0577946	0.0868554	0.174309	ASPM	1.22058	1.02912	-0.246149	0.0546496	0.104562	PKM	6.99925	7.34623	0.069804	0.0289089	0.0857998
KLF6	5.28651	4.9777	-0.0868346	0.01667	0.0561885	CD84	0.95438	1.66382	0.801867	1.92494e-06	3.07239e-05	DHX29	3.02498	3.15951	0.0627767	0.0641085	0.147499
PPAP2A	3.74146	4.15971	0.152881	0.0061672	0.0285731	ELOVL1	5.62129	5.36923	-0.0661854	0.0040333	0.0132851	DNTTIP2	2.98641	3.12816	0.0669061	0.0285756	0.0851547
NEO1	3.04095	3.39576	0.159212	0.0103975	0.0406024	SPI1	3.23871	3.91508	0.273623	0.000996591	0.0043974	METTL22	1.12751	1.25841	0.158454	0.00103618	0.00854467
TRAM1	6.00003	6.07035	0.0168098	0.302755	0.413051	ZNRD1	2.81817	2.48427	-0.181938	0.0035013	0.0118516	TP53BP1	1.89544	2.25386	0.249867	2.838e-06	0.000112967
PHKA1	1.74502	1.4717	-0.245764	0.00587287	0.0277334	MPPED2	0.206498	0.409032	0.986087	3.05824e-06	4.38093e-05	TRO	1.51392	1.72622	0.189321	0.0410339	0.109134
TNFRSF1A	5.61543	5.40065	-0.0562637	0.156924	0.261737	CLDN18	6.18955	4.02222	-0.621843	7.07828e-05	0.00053047	RRP15	1.69554	1.84477	0.121698	0.0114989	0.0453367
CACNB1	1.80078	1.24329	-0.534467	5.21043e-05	0.00134375	ZBTB11	1.97121	2.19316	0.15393	0.00210363	0.0079031	RHOA	7.5963	7.79484	0.0372227	0.0245349	0.0767638
STOML1	1.76708	1.67897	-0.0737972	0.35848	0.464525	ATXN3	0.868564	0.941313	0.116043	0.0486593	0.0953484	DHX8	2.81019	2.9236	0.0570795	0.0608955	0.142708
PKM	7.56377	6.99925	-0.111906	0.000703121	0.00691398	FGFR2	2.31769	1.93865	-0.25763	0.032074	0.0688587	PMS2P4	1.0815	1.23865	0.195729	0.00871486	0.0374436
DHX29	3.08323	3.02498	-0.0275191	0.513361	0.598954	LRRC40	2.06267	2.42962	0.236221	3.64476e-05	0.000313016	PRKCZ	1.89468	1.84011	-0.0421584	0.463676	0.561794
DNTTIP2	3.10433	2.98641	-0.055871	0.132656	0.233051	ISOC1	3.43044	3.37044	-0.0254537	0.193426	0.279895	ZFY	0.606896	0.720464	0.247475	0.285806	0.404856
METTL22	1.25263	1.12751	-0.151813	0.0149328	0.0521892	EML1	1.02743	1.69626	0.723317	2.27201e-10	5.00717e-08	IARS2	4.54836	4.61851	0.0220797	0.491988	0.584208
TP53BP1	1.90301	1.89544	-0.005749	0.819208	0.850008	TRMT11	2.58572	2.51577	-0.0395665	0.193426	0.279895	SYT1	0.610806	0.798059	0.385781	0.0093166	0.0393074
TRO	1.06469	1.51392	0.507859	3.95419e-05	0.00114434	THUMPD1	3.30268	3.4112	0.0466427	0.168156	0.250841	NAV3	0.608756	0.859253	0.497218	0.000642704	0.0061392
RRP15	1.87269	1.69554	-0.143371	0.0294528	0.0825779	MSANTD3	2.86721	3.03487	0.0819867	0.0101546	0.0278187	PDZD4	1.25216	1.75563	0.48757	0.000543032	0.00539995
DHX8	2.89423	2.81019	-0.0425108	0.362693	0.468356	KIF26A	0.513453	0.847005	0.722138	0.000209374	0.00125703	ATP2B3	0.0302152	0.0667241	1.14293	0.0560158	0.134903
PMS2P4	1.18053	1.0815	-0.126403	0.0883429	0.176433	ATG2B	1.68462	1.93837	0.202426	0.00128463	0.00535108	ROCK1	2.66608	2.9691	0.155306	0.00516528	0.0260509
ZFY	0.711206	0.606896	-0.228818	0.348782	0.456358	ARFGEF1	2.99845	3.0066	0.0039165	0.944732	0.954224	CBFB	3.88216	4.14308	0.093841	0.000811035	0.00723015
IARS2	4.85447	4.54836	-0.093965	0.00260021	0.0161824	ZFAT	0.995112	1.10891	0.156213	0.0870981	0.15037	PDK3	1.7965	2.16043	0.266129	5.25435e-06	0.000181916
SYT1	0.393466	0.610806	0.634474	0.00992703	0.0393534	MTFR1	2.56377	2.46823	-0.0547903	0.175108	0.259135	HYAL2	3.99077	4.18038	0.0669673	0.0324301	0.0925715
NAV3	0.418674	0.608756	0.540038	0.00383856	0.0209428	STAG3	0.543647	0.834415	0.618096	0.00206484	0.00778894	HDAC4	1.20047	1.40591	0.227896	0.00692021	0.0319536
IDH3G	4.54145	4.3457	-0.063564	0.0622375	0.138594	FECH	1.84106	2.27065	0.302566	1.23655e-07	3.74099e-06	RASSF1	3.22038	3.37083	0.0658731	0.122221	0.228147
ROGDI	3.32383	3.13987	-0.0821437	0.0557841	0.128386	MYO9A	1.03863	1.32937	0.356069	1.87273e-06	3.00749e-05	FGFR3	3.82935	2.74234	-0.481693	8.20732e-08	7.67118e-06
PDZD4	1.04713	1.25216	0.257976	0.0159549	0.0545676	DDX3Y	1.74971	1.74686	-0.0023505	0.926989	0.939153	IFI35	4.62542	4.51185	-0.0358657	0.250847	0.369677
ATP2B3	0.0169031	0.0302152	0.837984	0.000960941	0.00849279	PFKP	5.29647	5.06021	-0.0658354	0.00878178	0.0247271	HEATR6	1.86202	2.16455	0.217197	8.79784e-06	0.000261604
ROCK1	2.65261	2.66608	0.00730766	0.544851	0.624999	IDI1	4.09539	3.93379	-0.0580836	0.146989	0.225888	COASY	4.1703	4.15761	-0.00439783	0.994536	0.995808
CBFB	4.17257	3.88216	-0.104074	0.00696197	0.0310413	KLF6	5.28651	5.47785	0.0512962	0.123808	0.197643	PLEKHH3	2.78562	2.59673	-0.101307	0.0488229	0.122881
PDK3	1.78669	1.7965	0.00789434	0.685478	0.741783	PPAP2A	3.74146	4.4091	0.236882	1.27035e-06	2.21115e-05	MEF2A	2.91872	3.30496	0.1793	2.43151e-05	0.000558634
HYAL2	3.96183	3.99077	0.0104993	0.633236	0.698085	NEO1	3.04095	3.35693	0.142624	0.0134851	0.034872	OTUD5	4.34999	4.54997	0.0648449	0.0110581	0.0441647
HDAC4	1.1609	1.20047	0.048354	0.291608	0.40214	TRAM1	6.00003	6.14217	0.033777	0.15649	0.237119	TFE3	3.92258	4.27601	0.124461	3.6917e-10	1.04228e-07
RASSF1	3.24824	3.22038	-0.0124312	0.869412	0.89125	PHKA1	1.74502	1.55722	-0.164278	0.0303363	0.0658636	TBC1D25	2.51467	2.67648	0.0899713	0.0146706	0.0538492
FGFR3	3.29416	3.82935	0.217187	0.00883277	0.0363826	TNFRSF1A	5.61543	5.477	-0.0360086	0.341543	0.43063	ACSL4	3.43738	3.76647	0.131905	0.00502116	0.0255089
HEATR6	1.79316	1.86202	0.0543677	0.187084	0.296761	CACNB1	1.80078	1.52722	-0.23772	0.0145671	0.0370318	GPKOW	3.89347	3.98454	0.0333555	0.594786	0.669798
COASY	4.44413	4.1703	-0.0917475	0.000312281	0.00415523	EVI5	1.91485	2.12182	0.148075	0.0234822	0.0537567	GRIPAP1	3.16655	3.44719	0.122509	0.00125654	0.00982067
PLEKHH3	2.9252	2.78562	-0.0705327	0.411061	0.511148	STOML1	1.76708	1.64433	-0.103874	0.0252362	0.0568723	FTSJ1	3.81636	3.97734	0.0596076	0.0172631	0.0600645
OTUD5	4.49329	4.34999	-0.0467594	0.115052	0.211869	PKM	7.56377	7.34623	-0.0421021	0.0245214	0.0556158	PRR11	1.35109	1.55047	0.198583	0.0596482	0.140818
TFE3	4.02399	3.92258	-0.0368238	0.259836	0.371558	DHX29	3.08323	3.15951	0.0352576	0.319499	0.409504	ATP11A	2.86059	2.84236	-0.00922369	0.617108	0.687752
TBC1D25	2.60501	2.51467	-0.0509219	0.243259	0.354861	METTL22	1.25263	1.25841	0.0066411	0.809364	0.838302	POLR1A	2.0369	2.20866	0.116794	0.00376764	0.020993
INPP5A	3.22403	3.16241	-0.0278388	0.513361	0.598954	TP53BP1	1.90301	2.25386	0.244118	6.2979e-05	0.000481673	LAPTM4A	7.41625	7.51565	0.0192073	0.102623	0.202788
GPKOW	4.11047	3.89347	-0.0782458	0.00803634	0.0341227	TRO	1.06469	1.72622	0.69718	1.18256e-10	3.49282e-08	TTC7A	3.41977	3.49077	0.0296468	0.228944	0.348016
GRIPAP1	3.49125	3.16655	-0.140829	0.000492879	0.00554484	RRP15	1.87269	1.84477	-0.0216729	0.883159	0.901279	IP6K2	3.53764	3.63367	0.0386394	0.466465	0.563926
FTSJ1	4.0297	3.81636	-0.0784735	0.0113984	0.0432717	RHOA	7.68278	7.79484	0.020891	0.0782687	0.138292	STON1-GTF2A1L	0.0463243	0.079856	0.78563	0.000119537	0.00177436
PRR11	1.64833	1.35109	-0.286884	0.0260483	0.0761962	DHX8	2.89423	2.9236	0.0145687	0.432604	0.513745	SRBD1	1.97136	2.10705	0.096036	0.0383979	0.104167
REEP1	1.15625	1.24238	0.103655	0.295292	0.40578	PMS2P4	1.18053	1.23865	0.0693264	0.588697	0.65015	KIF2A	2.376	2.61001	0.135523	0.00883236	0.0378178
ATP11A	2.89179	2.86059	-0.0156479	0.673727	0.731758	PRKCZ	1.86265	1.84011	-0.0175597	0.285708	0.376537	RASGRP2	1.17725	1.63022	0.469645	0.0889893	0.184193
POLR1A	2.02731	2.0369	0.00680718	0.856803	0.880973	IARS2	4.85447	4.61851	-0.0718853	0.00863998	0.024419	PSME4	2.95464	3.09994	0.0692566	0.029929	0.0877929
LAPTM4A	7.39522	7.41625	0.00409633	0.550191	0.629446	SYT1	0.393466	0.798059	1.02026	3.14183e-06	4.46274e-05	IFT80	1.54547	1.71948	0.153921	0.0094413	0.0396503
TTC7A	3.6526	3.41977	-0.0950236	0.0913796	0.180589	NAV3	0.418674	0.859253	1.03726	1.74345e-09	1.80325e-07	SIRT2	3.08403	3.37135	0.128511	1.45621e-05	0.000378726
IP6K2	3.65402	3.53764	-0.0466982	0.321957	0.430962	IDH3G	4.54145	4.38927	-0.0491706	0.00770338	0.0222949	ERLEC1	4.95958	5.0935	0.0384414	0.0106324	0.0429656
STON1-GTF2A1L	0.0439998	0.0463243	0.0742724	1	1	ROGDI	3.32383	3.18214	-0.0628521	0.0338962	0.0718927	PPP2R5B	3.02827	3.42653	0.178252	3.38953e-06	0.000128925
SRBD1	1.85396	1.97136	0.0885796	0.107842	0.202434	PDZD4	1.04713	1.75563	0.745546	2.39158e-07	6.08514e-06	PYGM	0.380245	0.57058	0.585499	0.00523873	0.0263341
KIF2A	2.44777	2.376	-0.0429369	0.424889	0.522693	ATP2B3	0.0169031	0.0667241	1.98092	6.28568e-06	7.71571e-05	PITX1	2.7197	2.39735	-0.182005	0.203525	0.322183
RASGRP2	0.937206	1.17725	0.328988	0.0288602	0.0814471	ROCK1	2.65261	2.9691	0.162613	0.00133523	0.00551531	TRPC7	0.0421722	0.0990712	1.23217	0.668026	0.728373
PSME4	3.16713	2.95464	-0.10019	0.0249918	0.0742239	PDK3	1.78669	2.16043	0.274023	4.81735e-06	6.23384e-05	MAST4	1.73879	1.95893	0.171985	0.0100874	0.041542
IFT80	1.58259	1.54547	-0.034238	0.528987	0.611974	HYAL2	3.96183	4.18038	0.0774666	0.015725	0.0392817	GPR116	2.36866	2.83183	0.257665	0.000173096	0.002326
PPP2R5B	3.34492	3.02827	-0.143478	0.00058933	0.00620539	HDAC4	1.1609	1.40591	0.27625	0.000884938	0.00399016	SDK2	0.48818	0.594551	0.284389	0.00645964	0.0304639
PYGM	0.329469	0.380245	0.206789	0.116912	0.21418	RASSF1	3.24824	3.37083	0.053442	0.130723	0.206291	ADAM7	0.00920885	0.00332764	-1.46852	0.00238982	0.0153345
PITX1	3.54366	2.7197	-0.381794	0.00784757	0.0336019	FGFR3	3.29416	2.74234	-0.264506	0.00396301	0.0130988	NUP133	2.91048	3.0535	0.0692058	0.0225717	0.0725525
TRPC7	0.0636412	0.0421722	-0.593669	0.695257	0.750506	IFI35	4.88505	4.51185	-0.114654	0.00599619	0.0183283	NUCKS1	5.21005	5.48649	0.0745859	0.000490348	0.00502758
GPR116	2.04284	2.36866	0.213491	0.0122042	0.0453639	HEATR6	1.79316	2.16455	0.271564	6.70181e-09	4.38372e-07	VPS35	3.69566	3.79555	0.0384789	0.402131	0.509167
SDK2	0.431383	0.48818	0.178444	0.195253	0.305434	COASY	4.44413	4.15761	-0.0961453	2.82008e-06	4.12643e-05	DNAJA2	3.77469	3.92571	0.0565956	0.047786	0.121072
ADAM7	0.00126138	0.00920885	2.86802	0.00015598	0.00268697	PLEKHH3	2.9252	2.59673	-0.171839	0.0124747	0.0327799	KCNAB2	2.01018	2.2635	0.171228	0.0667786	0.151378
NUP133	3.03059	2.91048	-0.0583403	0.0622375	0.138594	MEF2A	2.85941	3.30496	0.208918	8.78783e-06	0.000101194	ABCC9	1.15419	1.6163	0.485808	0.00121704	0.009619
NUCKS1	5.40493	5.21005	-0.052979	0.030056	0.0835898	OTUD5	4.49329	4.54997	0.0180855	0.547354	0.614969	GAL	1.10409	1.08859	-0.0204014	0.70981	0.762308
VPS35	3.85103	3.69566	-0.0594137	0.0960914	0.187057	TFE3	4.02399	4.27601	0.0876377	6.75586e-05	0.000510162	CLEC2D	1.15673	1.50495	0.379661	0.0160204	0.0571866
DNAJA2	4.01085	3.77469	-0.0875487	0.00221671	0.0145334	ACSL4	3.49991	3.76647	0.105896	0.00809303	0.0232121	FUNDC1	3.45827	3.43176	-0.0110994	0.316252	0.433261
BCL3	4.85435	4.50382	-0.108129	0.039679	0.101008	INPP5A	3.22403	3.18656	-0.0168656	0.439137	0.5195	MAOB	4.27669	3.97086	-0.107045	0.0716712	0.158781
KCNAB2	1.66905	2.01018	0.268299	0.00663364	0.0300227	GPKOW	4.11047	3.98454	-0.0448903	0.00505593	0.0159634	RORA	1.21782	1.46984	0.271358	0.00306732	0.0182335
ABCC9	0.682072	1.15419	0.758891	3.32129e-05	0.00101516	GRIPAP1	3.49125	3.44719	-0.0183202	0.238596	0.328565	DRD4	0.84161	0.880327	0.0648867	0.430932	0.534174
GAL	0.949644	1.10409	0.217401	0.038914	0.0996593	FTSJ1	4.0297	3.97734	-0.0188659	0.382403	0.468879	KIAA1107	1.04223	1.10587	0.0855147	0.545202	0.628272
FUNDC1	3.59656	3.45827	-0.0565669	0.295292	0.40578	REEP1	1.15625	1.29153	0.159627	0.536333	0.605817	PLA2G10	2.29958	1.57183	-0.548924	0.00142666	0.0107545
MAOB	4.27154	4.27669	0.00173888	0.920148	0.934556	ATP11A	2.89179	2.84236	-0.0248716	0.367478	0.454784	HES2	0.488684	0.603255	0.303866	0.38692	0.49617
RORA	0.956639	1.21782	0.34825	0.00374173	0.0206197	POLR1A	2.02731	2.20866	0.123601	0.00709119	0.0208693	ATP1B3	5.03048	5.32794	0.0828813	5.17531e-05	0.000967448
DRD4	1.17106	0.84161	-0.476585	0.00545508	0.0264476	LAPTM4A	7.39522	7.51565	0.0233036	0.0224814	0.051968	NEDD4	1.20309	1.44884	0.268152	8.37454e-05	0.0013758
TGFBR3	1.68605	2.28357	0.437648	3.43962e-05	0.00103618	TTC7A	3.6526	3.49077	-0.0653768	0.355803	0.443651	PIGB	1.70778	1.77844	0.0584899	0.320682	0.437317
KIAA1107	0.936039	1.04223	0.155033	0.0853881	0.172305	IP6K2	3.65402	3.63367	-0.00805877	0.569727	0.634013	MAPK6	2.88412	3.05864	0.0847581	0.100715	0.200056
PLA2G10	2.87624	2.29958	-0.322814	0.0185823	0.0606026	STON1-GTF2A1L	0.0439998	0.079856	0.859902	0.000343601	0.00186494	GNB5	1.79489	1.88466	0.0704129	0.264279	0.38298
HES2	0.637782	0.488684	-0.384162	0.16901	0.275951	SRBD1	1.85396	2.10705	0.184616	0.000724274	0.00339726	RAB27A	2.92316	2.9794	0.0274921	0.409869	0.515674
ATP1B3	5.29507	5.03048	-0.0739512	0.0319295	0.0870934	KIF2A	2.44777	2.61001	0.0925866	0.11589	0.187797	CECR5	2.91984	2.84361	-0.038165	0.0457677	0.117469
NEDD4	1.19025	1.20309	0.0154841	0.697306	0.751818	RASGRP2	0.937206	1.63022	0.798633	0.000754059	0.00350768	UFD1L	2.67794	2.80316	0.0659286	0.0254206	0.0788324
PIGB	1.82489	1.70778	-0.0956871	0.102674	0.195435	PSME4	3.16713	3.09994	-0.0309339	0.397693	0.482793	GUCY2C	0.941961	0.923343	-0.0288014	0.55434	0.63618
MAPK6	3.18698	2.88412	-0.144055	0.01667	0.0561885	IFT80	1.58259	1.71948	0.119683	0.0989627	0.16599	SCT	1.77494	2.19375	0.30563	0.00628327	0.0298635
GNB5	1.65845	1.79489	0.114061	0.0568192	0.130157	SIRT2	3.11322	3.37135	0.114916	6.26835e-06	7.69774e-05	IKBKAP	2.72032	2.97034	0.126855	0.001749	0.0123767
CECR5	2.91054	2.91984	0.0046018	0.621859	0.689076	ERLEC1	4.94347	5.0935	0.0431352	0.0505917	0.0984186	NUCB2	3.27426	2.95014	-0.150389	0.00761456	0.0341073
UFD1L	2.80061	2.67794	-0.0646168	0.0929291	0.182837	PYGM	0.329469	0.57058	0.792289	0.000175572	0.0010947	PFN2	3.70072	4.2312	0.193262	0.000420191	0.00452868
LRP6	2.11496	2.16141	0.0313472	0.550191	0.629446	PITX1	3.54366	2.39735	-0.563799	7.33041e-06	8.78025e-05	PTPN3	2.34506	2.1427	-0.130194	0.0405842	0.108412
SCT	2.14719	1.77494	-0.274685	0.0517993	0.122203	TRPC7	0.0636412	0.0990712	0.638504	0.900203	0.916713	DAPP1	1.849	2.17487	0.234188	0.00399286	0.0218043
PHRF1	3.48988	3.35074	-0.0586979	0.192501	0.302627	MAST4	1.77462	1.95893	0.142552	0.0132774	0.0344438	FGF10	0.61662	0.837029	0.440897	0.0881333	0.182853
IKBKAP	2.69593	2.72032	0.0129935	0.49798	0.585824	GPR116	2.04284	2.83183	0.471156	5.15957e-10	8.21231e-08	SLC44A1	3.8162	3.86022	0.0165467	0.623553	0.692735
NUCB2	2.72104	3.27426	0.267012	7.31552e-05	0.00166135	SDK2	0.431383	0.594551	0.462833	0.000628418	0.00302795	TMEM260	1.78619	1.97025	0.141494	0.00982439	0.0407591
PFN2	3.31796	3.70072	0.157507	0.00925683	0.0374778	VPS35	3.85103	3.79555	-0.0209348	0.278266	0.36926	SMG6	1.50633	1.74481	0.212034	0.001749	0.0123767
PTPN3	2.50803	2.34506	-0.0969322	0.12459	0.223344	DNAJA2	4.01085	3.92571	-0.0309531	0.0546496	0.104562	EXOC5	2.09032	2.43231	0.218605	8.98658e-06	0.000265774
SPTB	0.210936	0.388162	0.879856	5.13372e-06	0.000281961	BCL3	4.85435	4.43466	-0.130455	0.0162104	0.0402032	CLTCL1	0.63308	0.819017	0.371504	0.000163868	0.00222936
DAPP1	2.09225	1.849	-0.17831	0.00925683	0.0374778	KCNAB2	1.66905	2.2635	0.439528	2.35e-05	0.000220385	FGF22	0.0519776	0.0626293	0.268947	0.168554	0.283251
FGF10	0.344737	0.61662	0.838883	0.000128423	0.0023825	ABCC9	0.682072	1.6163	1.2447	2.07395e-12	3.30104e-09	FSTL3	4.94837	5.11804	0.0486359	0.278199	0.397245
SLC44A1	4.06058	3.8162	-0.0895484	0.104374	0.197716	GAL	0.949644	1.08859	0.196999	0.0912723	0.155949	DGCR2	4.83399	4.78367	-0.0150961	0.341114	0.455096
TMEM260	1.83421	1.78619	-0.0382739	0.577271	0.651759	CLEC2D	1.22382	1.50495	0.298323	0.0299148	0.0651359	RNF126	3.40769	3.31288	-0.0407072	0.601126	0.67469
SMG6	1.33264	1.50633	0.176749	0.039679	0.101008	FUNDC1	3.59656	3.43176	-0.0676664	0.0278817	0.0615417	MNT	1.95832	2.25008	0.200355	6.9566e-06	0.000223084
EXOC5	2.04737	2.09032	0.0299505	0.429558	0.527322	MAOB	4.27154	3.97086	-0.105306	0.053955	0.103509	JMJD6	2.47291	2.78008	0.168913	7.90956e-06	0.000242458
CLTCL1	0.575538	0.63308	0.137479	0.448529	0.543806	RORA	0.956639	1.46984	0.619609	2.06846e-09	1.99534e-07	ST6GALNAC1	3.6365	3.18183	-0.192696	0.0933618	0.190324
FGF22	0.0745908	0.0519776	-0.521108	0.0692578	0.149399	DRD4	1.17106	0.880327	-0.411698	0.0167088	0.0411049	WIPI1	2.8309	3.16288	0.159976	9.92865e-05	0.00154142
FSTL3	4.66186	4.94837	0.0860504	0.318055	0.427293	TGFBR3	1.68605	2.35239	0.480482	0.000228482	0.00134608	FRMPD1	0.160449	0.291855	0.863138	0.433609	0.536448
DGCR2	4.69977	4.83399	0.0406227	0.198033	0.30827	KIAA1107	0.936039	1.10587	0.240547	0.0134851	0.034872	GBA2	3.56933	3.73399	0.065067	0.220232	0.33914
RNF126	3.74456	3.40769	-0.136002	0.00904258	0.0369091	PLA2G10	2.87624	1.57183	-0.871738	2.97113e-08	1.30965e-06	NDST1	3.27753	3.6892	0.170698	1.58202e-05	0.000403777
MNT	2.13247	1.95832	-0.122908	0.0611209	0.13686	ATP1B3	5.29507	5.32794	0.00893002	0.252115	0.342327	AP3M2	2.26317	2.54664	0.170248	0.000971069	0.00820034
ZXDC	2.14552	2.21169	0.0438184	0.362693	0.468356	NEDD4	1.19025	1.44884	0.283636	0.000183505	0.00113331	CNGB1	0.046339	0.0546153	0.237077	0.305321	0.423351
JMJD6	2.75612	2.47291	-0.156425	0.00481803	0.0243381	PIGB	1.82489	1.77844	-0.0371972	0.316811	0.406987	ST6GALNAC2	1.39979	1.16372	-0.266464	0.00803879	0.0353428
POLB	2.92927	2.50822	-0.223876	5.39176e-05	0.00137529	MAPK6	3.18698	3.05864	-0.0592968	0.137935	0.215007	PABPC1	7.65487	7.72148	0.0124995	0.252736	0.371501
ST6GALNAC1	4.39063	3.6365	-0.271877	0.0139688	0.0499405	GNB5	1.65845	1.88466	0.184474	0.00184558	0.00714248	TESK2	1.32505	1.31872	-0.00690662	0.676116	0.734271
WIPI1	2.96731	2.8309	-0.0678931	0.259836	0.371558	CECR5	2.91054	2.84361	-0.0335632	0.285708	0.376537	CFAP20	3.34129	3.55494	0.0894194	0.00387876	0.0213472
FRMPD1	0.0661756	0.160449	1.27774	0.000128423	0.0023825	LRP6	2.11496	2.18132	0.0445769	0.370433	0.457493	CSNK2A2	3.27518	3.37113	0.0416576	0.15102	0.262809
GBA2	4.03307	3.56933	-0.176225	0.00663364	0.0300227	SCT	2.14719	2.19375	0.0309452	0.75402	0.791162	PTPN21	2.00699	2.18163	0.120373	0.0183625	0.0627261
NDST1	2.94896	3.27753	0.152403	0.00679602	0.0305008	PHRF1	3.48988	3.41008	-0.0333703	0.171606	0.255048	EIF2B3	2.48381	2.67111	0.104886	0.000434919	0.00464355
AP3M2	2.71105	2.26317	-0.260504	6.20887e-06	0.000325047	IKBKAP	2.69593	2.97034	0.139849	0.000850376	0.00386412	CAMK2A	0.141737	0.275824	0.960535	1.11934e-06	5.63498e-05
CNGB1	0.0630046	0.046339	-0.443231	0.650438	0.712275	NUCB2	2.72104	2.95014	0.116623	0.0136956	0.035305	TCOF1	2.34877	2.53691	0.111168	0.00217	0.0143649
ST6GALNAC2	1.22407	1.39979	0.193521	0.0103975	0.0406024	PFN2	3.31796	4.2312	0.350768	1.23655e-07	3.74099e-06	CDC42	5.84827	5.97693	0.0313954	0.153636	0.265992
CHAT	0.0327698	0.0600725	0.874336	0.00426985	0.0224418	PTPN3	2.50803	2.1427	-0.227126	0.00116579	0.00498432	OSBPL3	2.64677	2.81378	0.0882778	0.0667786	0.151378
PABPC1	7.9119	7.65487	-0.0476466	0.0359782	0.0943976	SPTB	0.210936	0.55314	1.39084	1.53905e-05	0.000157703	EPHA8	0.237129	0.193942	-0.29005	0.0627676	0.145728
TESK2	1.24136	1.32505	0.0941249	0.122635	0.220957	DAPP1	2.09225	2.17487	0.0558778	0.830924	0.857039	RAD18	1.32316	1.4448	0.126877	0.0233957	0.0743979
CFAP20	3.5259	3.34129	-0.0775859	0.0366939	0.0956916	FGF10	0.344737	0.837029	1.27978	4.82691e-07	1.04859e-05	ATP2B1	2.58206	2.88046	0.157777	0.00461036	0.0240723
CSNK2A2	3.423	3.27518	-0.0636872	0.0319295	0.0870934	SLC44A1	4.06058	3.86022	-0.0730017	0.130723	0.206291	TRPM5	0.781088	0.611627	-0.352834	0.000252715	0.00309127
PTPN21	1.91154	2.00699	0.0702952	0.273648	0.385163	TMEM260	1.83421	1.97025	0.10322	0.143921	0.222331	NCK2	4.63395	4.59901	-0.0109178	0.551286	0.633338
EIF2B3	2.49293	2.48381	-0.00528989	0.715186	0.766308	SMG6	1.33264	1.74481	0.388783	1.43837e-07	4.20932e-06	MAP4K4	3.85629	4.20212	0.123907	4.8808e-05	0.000923743
CAMK2A	0.126063	0.141737	0.169076	0.329856	0.438345	EXOC5	2.04737	2.43231	0.248555	1.34325e-06	2.31972e-05	MGAT4A	2.53054	2.61125	0.0452924	0.512346	0.600929
TCOF1	2.58419	2.34877	-0.137809	0.00713155	0.0315458	CLTCL1	0.575538	0.819017	0.508983	8.34544e-06	9.71544e-05	WDR1	5.35003	5.61769	0.0704303	0.000571308	0.0055998
OSBPL3	3.20964	2.64677	-0.278176	2.0952e-05	0.000746159	FGF22	0.0745908	0.0626293	-0.252161	0.536136	0.605817	SNX13	1.59414	1.76418	0.146213	0.0339382	0.0955713
EPHA8	0.075861	0.237129	1.64424	1.94707e-05	0.000709835	FSTL3	4.66186	5.11804	0.134686	0.0177463	0.0431167	ARHGAP10	1.24781	1.46589	0.232383	8.53512e-05	0.0013905
SLC12A3	0.0390489	0.0602236	0.625047	0.00775443	0.0334438	DGCR2	4.69977	4.78367	0.0255266	0.465827	0.544222	RPS6KA2	2.95652	3.13453	0.0843479	0.0110581	0.0441647
RAD18	1.43075	1.32316	-0.112776	0.0705347	0.151182	RNF126	3.74456	3.31288	-0.17671	7.41564e-05	0.000550125	ING3	1.50626	1.59633	0.0837881	0.296818	0.415257
ATP2B1	2.36501	2.58206	0.12668	0.0325758	0.0883136	MNT	2.13247	2.25008	0.0774466	0.0221561	0.0514028	VASH1	2.34073	2.80395	0.260506	3.2875e-05	0.000694152
TRPM5	0.744882	0.781088	0.0684722	0.406512	0.507319	ZXDC	2.14552	2.26937	0.0809626	0.11461	0.186186	LMCD1	2.55137	3.15069	0.304397	5.28927e-07	3.28462e-05
NCK2	4.58641	4.63395	0.0148759	0.616205	0.684003	JMJD6	2.75612	2.78008	0.0124883	0.514632	0.587348	WBSCR22	3.41831	3.48447	0.0276538	0.364773	0.476675
MAP4K4	4.17141	3.85629	-0.113323	0.00169094	0.0121835	POLB	2.92927	2.55492	-0.197261	4.41623e-05	0.000364836	SEL1L	4.30104	3.96913	-0.11586	0.00956749	0.0400085
MGAT4A	2.04728	2.53054	0.305735	1.68794e-05	0.000644646	ST6GALNAC1	4.39063	3.18183	-0.464574	3.15206e-05	0.000277866	TRIP13	1.34869	1.5179	0.170512	0.0915925	0.187835
RPL31	6.97755	6.75602	-0.0465485	0.0319295	0.0870934	WIPI1	2.96731	3.16288	0.0920827	0.0132774	0.0344438	ATP6AP1	5.16967	5.38203	0.0580782	0.14716	0.258474
WDR1	5.47471	5.35003	-0.0332374	0.284331	0.395323	FRMPD1	0.0661756	0.291855	2.14088	0.000143686	0.000935265	TCF3	3.62174	3.77513	0.0598429	0.282267	0.401066
SNX13	1.58239	1.59414	0.0106757	0.544851	0.624999	GBA2	4.03307	3.73399	-0.111158	0.0659941	0.121184	TRIB2	3.76744	4.10667	0.124385	0.0129163	0.0492792
ARHGAP10	1.1772	1.24781	0.0840394	0.310343	0.420468	NDST1	2.94896	3.6892	0.323101	4.17212e-10	7.33321e-08	DAZAP1	3.4896	3.48937	-9.77962e-05	0.672781	0.731722
RPS6KA2	2.80931	2.95652	0.0736828	0.411061	0.511148	AP3M2	2.71105	2.54664	-0.0902559	0.0256003	0.0575073	MBD3	3.05841	3.12773	0.0323342	0.334213	0.449039
ING3	1.37517	1.50626	0.131362	0.017038	0.0571395	CHAT	0.0327698	0.0616406	0.911512	0.0287851	0.0631852	HLTF	2.45288	2.74141	0.16044	0.00117869	0.00939725
VASH1	1.95671	2.34073	0.258528	0.00532189	0.0260285	PABPC1	7.9119	7.72148	-0.0351471	0.137935	0.215007	FAM50A	4.90583	5.1238	0.0627172	0.0661026	0.150331
LMCD1	2.31989	2.55137	0.137215	0.116912	0.21418	TESK2	1.24136	1.31872	0.0872182	0.121123	0.194368	FAM3A	3.3695	3.2759	-0.0406413	0.241549	0.36075
WBSCR22	3.86215	3.41831	-0.176122	6.95407e-06	0.000350917	CFAP20	3.5259	3.55494	0.0118336	0.631427	0.686672	MYO3B	0.22093	0.184152	-0.262692	0.065432	0.149365
SEL1L	3.61753	4.30104	0.249678	3.95419e-05	0.00114434	CSNK2A2	3.423	3.37113	-0.0220296	0.352922	0.440979	CYBRD1	4.81873	5.21564	0.114191	0.0204964	0.0676936
TRIP13	1.68613	1.34869	-0.322153	0.00246611	0.0155943	PTPN21	1.91154	2.18163	0.190668	0.00210363	0.0079031	SLC6A15	0.0419356	0.068896	0.716246	0.909105	0.924842
TCF3	3.91922	3.62174	-0.113883	0.00393766	0.0212964	EIF2B3	2.49293	2.67111	0.0995965	0.00721002	0.0211278	RDH11	3.80108	3.91983	0.0443795	0.374517	0.485217
DAZAP1	3.74338	3.4896	-0.10128	0.0130602	0.0477082	CAMK2A	0.126063	0.275824	1.12961	2.06123e-07	5.468e-06	PRKACA	3.64541	3.91265	0.102065	2.15245e-05	0.000507727
MBD3	3.03673	3.05841	0.0102658	0.788189	0.824248	CDC42	5.86045	5.97693	0.0283921	0.236394	0.326096	LPHN1	1.98894	2.31817	0.22099	0.00982439	0.0407591
PRLH	0.110977	0.0561205	-0.983658	0.0816377	0.167309	OSBPL3	3.20964	2.81378	-0.189898	0.000850376	0.00386412	ACTN1	4.96639	5.43665	0.130519	1.25867e-05	0.000339939
HLTF	2.33809	2.45288	0.0691502	0.118796	0.216595	EPHA8	0.075861	0.193942	1.35419	0.00706349	0.020852	ZFYVE26	1.61872	1.81062	0.161629	0.0020411	0.0137679
FAM50A	5.21154	4.90583	-0.0872126	0.00679602	0.0305008	SLC12A3	0.0390489	0.0955251	1.2906	0.0297031	0.0648475	RPS6KA6	0.554981	0.703913	0.34296	0.278199	0.397245
FAM3A	3.60922	3.3695	-0.0991548	0.0189869	0.0614707	ATP2B1	2.36501	2.88046	0.284457	4.56862e-06	5.99044e-05	EPN2	1.98963	2.22935	0.164122	0.000126603	0.00184718
CPSF1	4.31692	4.08033	-0.081318	0.0993392	0.191104	TRPM5	0.744882	0.611627	-0.284362	0.0474054	0.0933583	PTPN18	4.22808	4.18846	-0.0135831	0.425608	0.529733
MYO3B	0.123479	0.22093	0.839316	0.00102308	0.0088248	NCK2	4.58641	4.59901	0.00395803	0.865679	0.886471	LIMS2	1.964	2.364	0.26743	0.00237737	0.0152582
CYBRD1	4.30752	4.81873	0.161797	0.0130602	0.0477082	MGAT4A	2.04728	2.61125	0.351027	1.82187e-06	2.94066e-05	ASIC4	0.0408343	0.118451	1.53644	0.000128925	0.0018738
CDH19	0.361432	0.587	0.699638	0.00105258	0.00898227	RPL31	6.97755	6.7198	-0.0543019	0.00721002	0.0211278	SPEG	0.634976	0.97416	0.617456	0.000473874	0.00491572
SLC6A15	0.0204648	0.0419356	1.03503	0.000267251	0.00378694	WDR1	5.47471	5.61769	0.0371929	0.0668148	0.122214	LNX1	1.84844	1.55712	-0.24743	7.32787e-05	0.00124957
RDH11	3.90378	3.80108	-0.0384608	0.263243	0.374991	SNX13	1.58239	1.76418	0.156888	0.00921974	0.0256976	ALDH3A2	3.85486	3.37303	-0.192632	4.92248e-06	0.000173052
PRKACA	3.60727	3.64541	0.0151758	0.176589	0.284504	ARHGAP10	1.1772	1.46589	0.316422	0.000137401	0.000902459	TFRC	3.46646	3.68428	0.0879222	0.0951584	0.192938
LPHN1	1.73432	1.98894	0.197632	0.00204507	0.0137698	RPS6KA2	2.80931	3.13453	0.158031	0.000667955	0.00317836	SREBF1	3.36298	3.59093	0.094616	0.140895	0.250996
ACTN1	5.16711	4.96639	-0.0571582	0.161677	0.26732	ING3	1.37517	1.59633	0.21515	0.000628418	0.00302795	AFF4	3.2268	3.5936	0.155324	0.000261891	0.00317633
ZFYVE26	1.53702	1.61872	0.0747129	0.159287	0.264605	VASH1	1.95671	2.80395	0.519034	3.23052e-11	1.59576e-08	UBE2D1	2.63385	2.86138	0.119538	0.0285756	0.0851547
EPN2	2.24322	1.98963	-0.173067	0.00193751	0.0132986	LMCD1	2.31989	3.15069	0.441613	6.48375e-09	4.28017e-07	MPP5	2.17961	2.21026	0.0201506	0.885641	0.905817
PTPN18	4.52494	4.22808	-0.0978949	0.00601841	0.0281309	WBSCR22	3.86215	3.48447	-0.148468	3.49863e-06	4.86581e-05	RHOBTB1	2.53933	2.70347	0.0903632	0.0452745	0.116607
LIMS2	1.84089	1.964	0.0933937	0.273648	0.385163	SEL1L	3.61753	3.96913	0.133818	0.0057964	0.0178126	SMC1A	3.04131	3.20496	0.0756126	0.0889893	0.184193
ASIC4	0.0830383	0.0408343	-1.02399	0.00246601	0.0155943	TRIP13	1.68613	1.5179	-0.151641	0.110837	0.18158	HSD17B10	5.66937	5.59409	-0.0192839	0.149725	0.26127
SPEG	0.685594	0.634976	-0.110651	0.463064	0.556051	ATP6AP1	5.21663	5.38203	0.0450345	0.316811	0.406987	MARK2	3.72953	3.69919	-0.011783	0.208438	0.326897
LNX1	1.8435	1.84844	0.00386349	0.650464	0.712275	TCF3	3.91922	3.77513	-0.0540398	0.0589754	0.110971	HMMR	1.38324	1.47292	0.0906236	0.331933	0.446918
ALDH3A2	3.67017	3.85486	0.0708314	0.0589375	0.133511	TRIB2	3.85735	4.10667	0.0903575	0.0881269	0.151778	CHFR	1.34071	1.48719	0.149593	0.0212543	0.0693931
TFRC	3.80624	3.46646	-0.134905	0.0229895	0.0701708	DAZAP1	3.74338	3.48937	-0.101378	0.00116579	0.00498432	TRHDE	0.47746	0.311776	-0.614868	0.0056996	0.0278681
SREBF1	3.71447	3.36298	-0.143413	0.0249918	0.0742239	MBD3	3.03673	3.12773	0.0426	0.201134	0.288124	P4HA2	3.17063	3.33201	0.0716237	0.0674602	0.152481
TRPC5	0.00281688	0.00712827	1.33945	0.0118604	0.0446438	PRLH	0.110977	0.0827469	-0.42348	0.384575	0.471241	FCGR2B	1.219	1.52544	0.323527	0.00637091	0.0301858
AFF4	3.3235	3.2268	-0.0425999	0.41564	0.514804	HLTF	2.33809	2.74141	0.22959	1.42703e-05	0.000149267	NFATC3	1.48059	1.62948	0.138244	0.0396973	0.106751
UBE2D1	2.71972	2.63385	-0.0462866	0.49798	0.585824	FAM50A	5.21154	5.1238	-0.0244954	0.164758	0.24684	TRNT1	1.77869	1.94622	0.129853	0.00538847	0.0267143
MPP5	2.291	2.17961	-0.0719109	0.224367	0.335962	FAM3A	3.60922	3.2759	-0.139796	7.24521e-05	0.000540842	ACADVL	5.81396	5.80882	-0.00127514	0.472073	0.568347
RHOBTB1	2.41278	2.53933	0.0737498	0.256459	0.368313	CPSF1	4.31692	4.11208	-0.0701343	0.053955	0.103509	STK10	2.73303	2.95934	0.11477	0.0339382	0.0955713
SMC1A	2.9292	3.04131	0.0541856	0.314183	0.424109	MYO3B	0.123479	0.184152	0.576624	0.0635813	0.117622	FBXW11	3.42312	3.59736	0.071627	0.0488229	0.122881
HSD17B10	5.76451	5.66937	-0.0240106	0.280739	0.391907	CYBRD1	4.30752	5.21564	0.275989	3.40595e-06	4.77166e-05	ACAP1	1.43483	1.78814	0.317577	0.131301	0.239338
MARK2	3.93304	3.72953	-0.0766509	0.00631929	0.029061	CDH19	0.361432	0.77005	1.09123	0.000716985	0.00337356	CRMP1	2.02913	2.5018	0.302107	0.0129163	0.0492792
HMMR	1.77416	1.38324	-0.35908	0.00374173	0.0206197	PDCD2	2.73521	2.68473	-0.0268755	0.472638	0.550093	EVC	2.10426	2.30259	0.129944	0.101665	0.201404
CHFR	1.42821	1.34071	-0.0912083	0.176589	0.284504	SLC6A15	0.0204648	0.068896	1.75127	0.00014931	0.000966718	SIDT1	1.05646	1.2523	0.24534	0.0343244	0.0963123
TRHDE	0.26401	0.47746	0.85479	0.00105258	0.00898227	RDH11	3.90378	3.91983	0.00591865	0.779426	0.812877	NDE1	2.01621	2.19436	0.122152	0.0363125	0.100265
P4HA2	3.23306	3.17063	-0.0281318	0.321957	0.430962	PRKACA	3.60727	3.91265	0.11724	1.10437e-06	1.99496e-05	MRVI1	2.44842	2.90836	0.248359	0.00252554	0.0158926
FCGR2B	0.872954	1.219	0.481721	0.00135578	0.0105021	LPHN1	1.73432	2.31817	0.418622	7.43244e-07	1.46451e-05	TMEM38A	2.13391	1.94809	-0.131437	0.218518	0.337469
NFATC3	1.37624	1.48059	0.105442	0.270149	0.381582	ACTN1	5.16711	5.43665	0.0733611	0.00983398	0.0270855	AP1M1	2.03558	2.26668	0.15514	0.000442463	0.00470574
TRNT1	1.94026	1.77869	-0.125429	0.0622375	0.138594	ZFYVE26	1.53702	1.81062	0.236342	2.14812e-06	3.35023e-05	PVR	3.89194	4.19553	0.108362	0.00883236	0.0378178
STK10	2.79869	2.73303	-0.0342499	0.679593	0.736898	RPS6KA6	0.555134	0.703913	0.342561	0.191533	0.277717	SCARB1	2.63671	2.80566	0.0895995	0.280228	0.399288
FBXW11	3.40432	3.42312	0.0079471	0.560948	0.638122	EPN2	2.24322	2.22935	-0.00894563	0.878783	0.897517	CYP2W1	1.12528	0.968829	-0.215967	0.228944	0.348016
ACAP1	1.18737	1.43483	0.273115	0.0345825	0.09197	PTPN18	4.52494	4.18846	-0.111478	5.09393e-05	0.000409717	MCM2	2.58661	2.70713	0.0657029	0.303205	0.421202
CRMP1	1.66551	2.02913	0.284899	0.00210088	0.0140206	LIMS2	1.84089	2.364	0.360824	8.92225e-05	0.000636194	MOV10L1	0.111071	0.221902	0.998438	2.59561e-06	0.000105153
EVC	1.6269	2.10426	0.371192	0.00403909	0.0216233	ASIC4	0.0830383	0.118451	0.512446	0.733047	0.77315	PANX2	0.697983	0.791293	0.181019	0.170058	0.285036
DERL2	2.61814	2.73038	0.0605547	0.0225113	0.069111	SPEG	0.685594	0.97416	0.506804	0.0167088	0.0411049	SELO	3.47761	3.44618	-0.0130972	0.764895	0.807098
SIDT1	1.26668	1.05646	-0.261812	0.149994	0.253276	LNX1	1.8435	1.55712	-0.243567	0.0067452	0.0200884	ALPK1	1.55721	1.56028	0.00284001	0.63979	0.705792
NDE1	2.38569	2.01621	-0.242756	0.000723964	0.00702992	ALDH3A2	3.67017	3.37303	-0.121801	0.00550797	0.0171135	LLGL2	4.40184	4.31873	-0.0274992	0.656201	0.718542
MRVI1	2.2591	2.44842	0.116098	0.12657	0.225749	TFRC	3.80624	3.68428	-0.0469824	0.283213	0.374195	PDE8A	2.49586	2.48784	-0.00464439	0.679458	0.736994
TMEM38A	2.86141	2.13391	-0.423231	4.09382e-05	0.00117261	SREBF1	3.71447	3.59093	-0.0487966	0.261419	0.352239	CLCN4	1.4564	1.64775	0.178089	0.0560329	0.134903
PVR	4.18581	3.89194	-0.105017	0.00803634	0.0341227	TRPC5	0.00281688	0.0075059	1.41393	0.00296027	0.0103809	NLE1	2.02702	1.99043	-0.0262794	0.582198	0.659391
XRCC1	3.68595	3.57056	-0.0458847	0.371212	0.476167	AFF4	3.3235	3.5936	0.112724	0.0103183	0.0281677	SDHA	3.84953	3.72489	-0.0474856	0.0204964	0.0676936
SCARB1	2.75285	2.63671	-0.0621841	0.270149	0.381582	UBE2D1	2.71972	2.86138	0.0732514	0.17688	0.261122	SMARCE1	2.52431	2.69016	0.0918052	0.0306261	0.0889517
CYP2W1	1.32898	1.12528	-0.240037	0.0366939	0.0956916	MPP5	2.291	2.21026	-0.0517603	0.205071	0.292186	FNDC8	0.0424328	0.0592602	0.481883	0.0565517	0.135916
MCM2	2.78725	2.58661	-0.107778	0.20368	0.314226	RHOBTB1	2.41278	2.70347	0.164113	0.0063075	0.0190562	KDM5A	2.58115	2.59992	0.0104496	0.352818	0.465181
MOV10L1	0.131491	0.111071	-0.243473	0.291608	0.40214	SMC1A	2.9292	3.20496	0.129798	0.00505593	0.0159634	ADAM11	0.127849	0.179839	0.492258	0.0068258	0.0316887
SELO	3.57846	3.47761	-0.0412406	0.523752	0.607829	HSD17B10	5.76451	5.59409	-0.0432946	0.0212048	0.0496135	FERMT2	2.54371	3.17708	0.320766	3.24273e-06	0.000125078
ALPK1	1.7133	1.55721	-0.137817	0.0215807	0.0671089	MARK2	3.93304	3.69919	-0.0884339	9.34176e-05	0.00065954	ABCB11	0.0706316	0.100284	0.505705	0.210083	0.328516
LLGL2	4.86671	4.40184	-0.14484	0.00117862	0.00964003	HMMR	1.77416	1.47292	-0.268457	0.0290867	0.0637009	DHRS9	2.52029	2.56353	0.0245456	0.871239	0.894293
PDE8A	2.41914	2.49586	0.0450396	0.438984	0.535742	TRHDE	0.26401	0.311776	0.239922	0.178664	0.263039	CD5L	0.0180393	0.167001	3.21064	0.0225944	0.072617
CLCN4	1.2719	1.4564	0.195424	0.0622375	0.138594	FCGR2B	0.872954	1.52544	0.805248	8.84348e-08	2.92908e-06	PTGS2	1.63247	2.72641	0.73995	1.54377e-06	7.11744e-05
SDHA	4.073	3.84953	-0.0814096	0.0271433	0.0782206	NFATC3	1.37624	1.62948	0.243686	0.00248399	0.009037	IGF2BP2	2.87261	2.8913	0.00935726	0.792911	0.829817
SMARCE1	2.51735	2.52431	0.00397888	0.528987	0.611974	TRNT1	1.94026	1.94622	0.00442412	0.770929	0.8056	MAP3K13	2.03819	2.11393	0.0526401	0.379448	0.489361
FNDC8	0.0399453	0.0424328	0.0871564	0.938463	0.950249	ACADVL	5.96743	5.80882	-0.0388634	0.150105	0.229545	FRY	1.68917	1.80206	0.0933311	0.220232	0.33914
GSDMB	3.92952	2.9867	-0.395798	6.17863e-05	0.00149809	STK10	2.79869	2.95934	0.0805205	0.11589	0.187797	PICALM	4.99055	5.27314	0.0794616	5.17531e-05	0.000967448
KDM5A	2.53375	2.58115	0.0267437	0.691383	0.746785	FBXW11	3.40432	3.59736	0.0795741	0.0162104	0.0402032	NSF	3.17957	3.34101	0.0714559	0.0433462	0.11312
ADAM11	0.162575	0.127849	-0.346662	0.513361	0.598954	ACAP1	1.18737	1.78814	0.590692	0.000296092	0.00165749	GLI2	1.31162	1.57607	0.264979	0.000880476	0.00764028
PPP2R3A	1.34121	1.48182	0.143843	0.107842	0.202434	CRMP1	1.66551	2.5018	0.587006	7.22354e-07	1.43122e-05	CLASP1	2.37796	2.62047	0.140105	7.90975e-05	0.00132568
FERMT2	2.19402	2.54371	0.213361	0.0152669	0.0529662	EVC	1.6269	2.30259	0.501136	1.88025e-05	0.000185117	MRPS34	5.66175	5.44208	-0.0570901	0.0220364	0.0711662
ABCB11	0.135001	0.0706316	-0.934579	0.00925683	0.0374778	DERL2	2.61814	2.75473	0.0733661	0.00609838	0.0185831	NOTCH3	4.00243	4.44893	0.152584	0.000442463	0.00470574
DHRS9	3.63604	2.52029	-0.52878	0.00559126	0.0268527	NDE1	2.38569	2.19436	-0.120604	0.0303363	0.0658636	PPP2R2C	0.735174	1.16846	0.668455	0.000318072	0.00366921
PTGS2	2.48311	1.63247	-0.605097	0.000207956	0.00323698	MRVI1	2.2591	2.90836	0.364458	7.33067e-06	8.78025e-05	TEAD2	3.49723	3.4934	-0.00158083	0.646334	0.710921
IGF2BP2	3.46427	2.87261	-0.270188	8.64833e-05	0.00185409	TMEM38A	2.86141	1.94809	-0.554669	4.20271e-08	1.72751e-06	EED	1.73936	1.8275	0.071313	0.325152	0.440997
MAP3K13	2.20564	2.03819	-0.113906	0.0181851	0.0597466	AP1M1	2.07597	2.26668	0.126794	0.00382575	0.012748	CDHR2	2.70973	2.72127	0.00612965	0.579071	0.656854
ST6GAL1	2.84873	3.05013	0.0985516	0.154588	0.259015	PVR	4.18581	4.19553	0.0033446	0.766692	0.80183	C17orf85	1.83123	2.08003	0.183794	5.92935e-05	0.0010641
TBX21	0.294994	0.558677	0.921329	0.000450377	0.00523959	CYP2W1	1.32898	0.968829	-0.456004	0.00133523	0.00551531	ATP2A3	4.43027	4.34208	-0.0290071	0.314053	0.431305
VDAC1P1	0.263463	0.202393	-0.380438	0.0319158	0.0870934	MCM2	2.78725	2.70713	-0.0420753	0.647286	0.7007	CA12	2.58699	2.31265	-0.161729	0.266238	0.385207
FRY	1.73124	1.68917	-0.0354861	0.539537	0.620686	MOV10L1	0.131491	0.221902	0.754965	0.00171151	0.00672538	MGLL	4.21331	4.29712	0.0284158	0.585333	0.662039
NSF	3.21795	3.17957	-0.0173113	0.50308	0.590036	PANX2	0.758896	0.791293	0.0603092	0.243045	0.332964	NTN4	3.83945	3.60315	-0.0916396	0.149725	0.26127
CLASP1	2.30262	2.37796	0.0464492	0.35848	0.464525	SELO	3.57846	3.44618	-0.0543378	0.308834	0.399066	BCS1L	2.73782	2.77379	0.0188292	0.764895	0.807098
MRPS34	5.89723	5.66175	-0.0587897	0.0568192	0.130157	TP63	0.581694	0.608572	0.0651678	0.521815	0.593371	NUAK1	2.30386	2.8688	0.316393	1.48674e-05	0.000383388
NOTCH3	3.89152	4.00243	0.040544	0.679593	0.736898	ALPK1	1.7133	1.56028	-0.134977	0.0334326	0.0710619	DPP8	2.22674	2.37219	0.0912854	0.0566225	0.135916
CLNS1A	4.01691	3.78864	-0.0844083	0.0108877	0.0419426	LLGL2	4.86671	4.31873	-0.172339	0.00141457	0.0057822	SLC24A1	1.17982	1.29383	0.133079	0.0462654	0.118336
PPP2R2C	1.11371	0.735174	-0.599218	0.0825137	0.16829	PDE8A	2.41914	2.48784	0.0403952	0.536333	0.605817	ZNF532	2.20031	2.66625	0.277108	2.42698e-06	0.000100099
TEAD2	2.91984	3.49723	0.260322	0.000132681	0.00242593	CLCN4	1.2719	1.64775	0.373513	0.000544476	0.00270257	SCARF1	1.68122	1.92431	0.194829	0.00793079	0.0350367
EED	1.84966	1.73936	-0.0887024	0.166538	0.272968	NLE1	2.06538	1.99043	-0.0533311	0.525425	0.596601	LMAN1	4.17631	4.3623	0.0628606	0.0681476	0.153528
CDHR2	3.66405	2.70973	-0.435287	0.00374173	0.0206197	SDHA	4.073	3.72489	-0.128895	2.3316e-06	3.56269e-05	PTPLAD1	3.84078	3.87259	0.0119001	0.961763	0.968768
SNCB	0.239472	0.355186	0.568721	0.0359775	0.0943976	SMARCE1	2.51735	2.69016	0.0957841	0.00523256	0.016409	ZZEF1	2.10518	2.2771	0.113251	0.0628069	0.145728
TSG101	4.43627	4.18108	-0.0854714	0.00117862	0.00964003	FNDC8	0.0399453	0.0592602	0.569039	0.0653461	0.120319	SLC12A1	0.0114992	0.0318283	1.46878	2.30437e-05	0.00053846
ATP2A3	4.16604	4.43027	0.0887171	0.106097	0.200206	GSDMB	3.92952	2.79492	-0.491542	1.19961e-07	3.66016e-06	MYDGF	5.8981	5.80598	-0.0227094	0.466465	0.563926
CA12	2.95927	2.58699	-0.193969	0.147737	0.250767	KDM5A	2.53375	2.59992	0.0371933	0.168156	0.250841	ANO8	2.0364	2.15259	0.0800559	0.343435	0.457168
MGLL	4.664	4.21331	-0.146613	0.0061672	0.0285731	ADAM11	0.162575	0.179839	0.145596	0.142406	0.220406	TUBE1	1.17085	1.34316	0.198076	0.00207265	0.013933
NTN4	3.64384	3.83945	0.0754379	0.393046	0.495646	PPP2R3A	1.34121	1.49781	0.159325	0.101253	0.168971	ARHGEF10L	3.23343	3.15328	-0.0362122	0.250847	0.369677
BCS1L	2.94638	2.73782	-0.105917	0.0193993	0.0623436	FERMT2	2.19402	3.17708	0.534127	1.64114e-10	4.35809e-08	TXK	0.521088	0.684888	0.394342	0.512346	0.600929
NUAK1	2.06364	2.30386	0.15886	0.0611209	0.13686	ABCB11	0.135001	0.100284	-0.428874	0.119792	0.192723	WSCD2	0.482934	0.559283	0.211753	0.761413	0.804199
DPP8	2.218	2.22674	0.00567181	0.837959	0.865641	DHRS9	3.63604	2.56353	-0.504234	0.00541475	0.0168806	ACTR6	2.24348	2.4806	0.144956	0.0016954	0.0121291
SLC24A1	1.177	1.17982	0.00345971	0.837959	0.865641	CD5L	0.0179303	0.167001	3.21939	0.041984	0.0850726	TIPIN	1.25757	1.34999	0.102304	0.0768538	0.166499
ZNF532	2.13544	2.20031	0.043174	0.673727	0.731758	PTGS2	2.48311	2.72641	0.134853	0.379388	0.466121	SRI	4.58093	4.65444	0.022968	0.582198	0.659391
SCARF1	1.54369	1.68122	0.123128	0.0944996	0.184692	IGF2BP2	3.46427	2.8913	-0.260831	0.00123581	0.00519608	EIF4G3	3.13265	3.49745	0.158916	3.38953e-06	0.000128925
LMAN1	3.96305	4.17631	0.0756168	0.10961	0.204817	MAP3K13	2.20564	2.11393	-0.0612663	0.193426	0.279895	SEMA3A	0.886111	1.27597	0.526035	4.25418e-05	0.000830991
PTPLAD1	3.97246	3.84078	-0.0486348	0.318055	0.427293	ST6GAL1	2.84873	3.17372	0.155856	0.133572	0.209989	GTSE1	1.22598	1.31392	0.0999365	0.376978	0.487345
IPCEF1	0.524606	0.767136	0.548249	0.000663099	0.00668262	TBX21	0.294994	0.621228	1.07444	0.000480965	0.00244147	SEMA3C	3.45141	3.97481	0.203702	0.0028053	0.0170724
ZZEF1	1.90445	2.10518	0.144575	0.0149328	0.0521892	VDAC1P1	0.263463	0.216034	-0.286341	0.0420946	0.085101	TTC38	3.65498	3.40926	-0.100406	0.0462654	0.118336
ENO1	7.83666	7.70674	-0.0241174	0.346026	0.453241	FRY	1.73124	1.80206	0.0578451	0.615736	0.673571	ACAT1	3.00525	2.79969	-0.102221	0.00387876	0.0213472
SLC12A1	0.00581941	0.0114992	0.982586	0.374292	0.47959	PICALM	5.03074	5.27314	0.0678909	0.00037413	0.00199531	GRAMD4	3.3215	3.49027	0.0715053	0.0969825	0.195148
MYDGF	6.15377	5.8981	-0.0612214	0.00210088	0.0140206	NSF	3.21795	3.34101	0.0541446	0.24529	0.335285	CELSR1	2.1703	2.40364	0.147323	0.0548691	0.133048
ANO8	2.60121	2.0364	-0.353164	0.000132681	0.00242593	GLI2	1.33522	1.57607	0.239247	0.0111728	0.0299637	WNT8B	0.0694911	0.0505551	-0.458973	0.00609726	0.0293053
ARHGEF10L	3.11288	3.23343	0.0548143	0.236842	0.348802	CLASP1	2.30262	2.62047	0.186554	8.34544e-06	9.71544e-05	ZNF638	2.92378	3.09241	0.0808976	0.0110581	0.0441647
TXK	0.420106	0.521088	0.310773	0.0325758	0.0883136	MRPS34	5.89723	5.44208	-0.11588	1.65944e-05	0.00016764	SLC25A40	2.02558	2.13484	0.0757951	0.428266	0.532006
WSCD2	0.360246	0.482934	0.422843	0.0377893	0.0978093	NOTCH3	3.89152	4.44893	0.193128	0.000196039	0.00119526	TIMM21	1.59393	1.70466	0.0968957	0.0367217	0.10098
KCNQ2	0.115196	0.185902	0.69046	0.00383856	0.0209428	CLNS1A	4.01691	3.82824	-0.0694039	0.00118871	0.00505742	ADD2	0.364817	0.587539	0.687509	5.8156e-05	0.00105033
TACR2	0.570841	0.472111	-0.273964	0.302755	0.413051	PPP2R2C	1.11371	1.16846	0.0692365	0.51106	0.583831	RASAL2	1.89193	2.21579	0.227961	9.03451e-05	0.00144016
ACTR6	2.22183	2.24348	0.0139858	0.656249	0.717092	TEAD2	2.91984	3.4934	0.258741	1.53905e-05	0.000157703	VPS9D1	2.98727	3.08311	0.0455613	0.659504	0.721293
TIPIN	1.24559	1.25757	0.0138141	0.691383	0.746785	EED	1.84966	1.8275	-0.0173894	0.482956	0.559036	ZNF37A	1.62279	1.69253	0.0606986	0.575951	0.654074
SRI	5.02837	4.58093	-0.134451	0.000128431	0.0023825	CDHR2	3.66405	2.72127	-0.429157	0.000406994	0.0021356	MARK3	2.97536	3.13629	0.0759941	0.0116493	0.045778
EIF4G3	3.12874	3.13265	0.00180537	0.850512	0.876342	SNCB	0.239472	0.576164	1.26662	0.00303343	0.0105706	SLC25A3	5.01729	5.01115	-0.00176702	0.566641	0.646288
NUP37	2.44058	2.30975	-0.0794837	0.209444	0.320167	TSG101	4.43627	4.22678	-0.06979	0.0003025	0.00168252	FNDC3B	3.12762	3.46984	0.149805	0.000434919	0.00464355
SEMA3A	0.719643	0.886111	0.300206	0.042051	0.105343	C17orf85	1.84981	2.08003	0.169225	0.000218732	0.00129987	FOSL2	4.64948	5.009	0.107453	1.71816e-05	0.000430892
GTSE1	1.46072	1.22598	-0.252744	0.047156	0.114316	CA12	2.95927	2.31265	-0.355699	0.0231444	0.0531788	CACNG5	0.0822706	0.134777	0.712123	0.213959	0.332773
SEMA3C	3.33645	3.45141	0.0488705	0.508207	0.594478	MGLL	4.664	4.29712	-0.118197	0.00733062	0.0214046	CACNG4	1.33451	2.14451	0.684343	0.0005339	0.00534407
TTC38	3.75889	3.65498	-0.0404424	0.200842	0.311394	NTN4	3.64384	3.60315	-0.0162017	0.671376	0.720652	FRYL	1.95179	2.16012	0.146315	0.00302216	0.0180355
ACAT1	2.34243	3.00525	0.35948	6.86089e-09	3.36496e-06	BCS1L	2.94638	2.77379	-0.0870875	0.0109971	0.029617	TMEM131	2.6725	2.79553	0.0649302	0.0548691	0.133048
GRAMD4	3.31867	3.3215	0.00122955	0.93927	0.950249	NUAK1	2.06364	2.8688	0.475253	2.06123e-07	5.468e-06	FSCN1	4.46864	4.92367	0.139898	0.00995514	0.0411333
CELSR1	2.49686	2.1703	-0.202219	0.0189869	0.0614707	DPP8	2.218	2.37219	0.0969572	0.0643777	0.118796	ACTB	10.4521	10.8035	0.0477029	0.000193035	0.00252458
WNT8B	0.0604344	0.0694911	0.201459	0.218206	0.329698	SLC24A1	1.177	1.29383	0.136538	0.0467893	0.0924237	MOCOS	1.39908	1.29092	-0.116082	0.206791	0.32547
ZNF638	2.99829	2.92378	-0.0363063	0.224367	0.335962	ZNF532	2.13544	2.66625	0.320282	2.67131e-06	3.96134e-05	PLD1	2.35485	2.02218	-0.219724	0.00302216	0.0180355
TIMM21	1.47953	1.59393	0.107447	0.0325758	0.0883136	SCARF1	1.54369	1.92431	0.317958	6.91539e-05	0.00052111	ATP12A	0.0504233	0.0281216	-0.842412	0.544044	0.627784
ADD2	0.193619	0.364817	0.913957	2.25062e-05	0.000778692	LMAN1	3.96305	4.3623	0.138477	0.000850376	0.00386412	WDR62	0.673548	0.730974	0.11804	0.503568	0.593966
VPS9D1	3.44686	2.98727	-0.206457	0.00221671	0.0145334	PTPLAD1	3.97246	3.87259	-0.0367347	0.290743	0.381436	DLG1	2.48122	2.68398	0.113324	0.00075918	0.00687985
ZNF37A	1.49781	1.62279	0.115625	0.0332333	0.0895059	IPCEF1	0.524606	0.774364	0.561777	0.0290867	0.0637009	RAB7A	6.42826	6.66162	0.0514453	0.000924745	0.00792895
MARK3	3.11387	2.97536	-0.0656467	0.0445418	0.109788	ZZEF1	1.90445	2.2771	0.257826	2.72309e-05	0.000249733	BCAP29	2.48583	2.71116	0.125184	0.000312532	0.00361903
SLC25A3	4.99165	5.01729	0.00739042	0.550191	0.629446	SLC12A1	0.00581941	0.0318283	2.45137	6.041e-08	2.239e-06	SEC31B	0.78368	1.0285	0.392199	0.0207464	0.0682557
FNDC3B	3.17538	3.12762	-0.0218657	0.582762	0.656208	MYDGF	6.15377	5.80598	-0.0839308	9.12973e-05	0.000647924	SART3	2.96556	3.13052	0.0780983	0.0176958	0.0611271
FOSL2	4.7903	4.64948	-0.0430468	0.147737	0.250767	ANO8	2.60121	2.15259	-0.273108	0.000480965	0.00244147	ARHGAP15	1.05625	1.24395	0.235974	0.376978	0.487345
CACNG5	0.0413167	0.0822706	0.993654	0.0199085	0.0635781	TUBE1	1.23981	1.34316	0.115512	0.0659941	0.121184	TUBA3D	0.218867	0.291137	0.411641	0.0118014	0.0462166
CACNG4	1.71283	1.33451	-0.360075	0.393046	0.495646	TXK	0.420106	0.684888	0.705115	0.018561	0.0447772	PAX2	0.06	0.0209772	-1.51614	7.54996e-10	1.82976e-07
FRYL	2.0975	1.95179	-0.103877	0.227441	0.339365	WSCD2	0.360246	0.559283	0.634597	0.105956	0.175262	KIFAP3	3.20376	3.38772	0.0805502	0.0143038	0.0529572
TMEM131	2.70985	2.6725	-0.0200201	0.528987	0.611974	KCNQ2	0.115196	0.313941	1.44641	0.0103183	0.0281677	MKRN2	3.22379	3.4196	0.0850691	0.00131802	0.0101705
FSCN1	5.04123	4.46864	-0.173938	0.016309	0.0553118	TACR2	0.570841	0.5325	-0.100308	0.00952244	0.0263949	MCM6	3.08885	3.3002	0.0954856	0.0245349	0.0767638
ACTB	10.7829	10.4521	-0.0449556	0.00631929	0.029061	ACTR6	2.22183	2.4806	0.158941	0.000579083	0.00283748	REXO2	3.60046	3.80955	0.0814382	0.00793079	0.0350367
MOCOS	1.72363	1.39908	-0.300972	0.00204507	0.0137698	TIPIN	1.24559	1.34999	0.116118	0.0612427	0.114254	RBM7	1.92492	2.08796	0.117296	0.0405842	0.108412
PLD1	2.24398	2.35485	0.0695757	0.249798	0.361645	SRI	5.02837	4.65444	-0.111483	9.77985e-05	0.000684733	RBMS2	2.83449	3.01947	0.0912058	0.00771869	0.0344274
ATP12A	0.0397498	0.0504233	0.343143	0.228065	0.340206	EIF4G3	3.12874	3.49745	0.160721	8.71923e-05	0.000624671	BAZ2A	3.41169	3.68648	0.111757	0.0044166	0.0233635
WDR62	0.83283	0.673548	-0.306241	0.0177955	0.0589025	NUP37	2.44058	2.35728	-0.0500988	0.268551	0.359331	PTPN23	3.57788	3.68865	0.0439872	0.336503	0.451142
DLG1	2.66712	2.48122	-0.104232	0.0255153	0.0751798	SEMA3A	0.719643	1.27597	0.826241	2.39158e-07	6.08514e-06	MLH1	3.07043	3.29076	0.0999811	0.00154355	0.0113535
RAB7A	6.5569	6.42826	-0.0285846	0.107842	0.202434	GTSE1	1.46072	1.31392	-0.152807	0.180462	0.265079	UNG	3.68277	3.66176	-0.00825498	0.466465	0.563926
BCAP29	2.55584	2.48583	-0.0400735	0.528987	0.611974	SEMA3C	3.33645	3.97481	0.252573	0.000939228	0.00418555	FMO4	1.62554	1.49661	-0.119214	0.0716712	0.158781
SEC31B	1.00618	0.78368	-0.360545	0.0177955	0.0589025	TTC38	3.75889	3.40926	-0.140848	0.00158645	0.00632066	KLHL20	2.29784	2.55282	0.151815	0.00159271	0.0116036
SART3	2.98543	2.96556	-0.00963536	0.599377	0.670087	ACAT1	2.34243	2.79969	0.25726	9.5936e-07	1.78363e-05	RGS11	1.20257	1.42687	0.246738	0.228944	0.348016
ARHGAP15	0.717691	1.05625	0.557523	0.000813206	0.00755784	GRAMD4	3.31867	3.49027	0.0727348	0.0923405	0.157277	SLC46A1	0.974638	0.942364	-0.0485823	0.29261	0.411198
TUBA3D	0.246479	0.218867	-0.171408	0.314183	0.424109	CELSR1	2.49686	2.40364	-0.0548961	0.298407	0.388837	PLXNA2	2.77804	2.58603	-0.103329	0.0254206	0.0788324
PAX2	0.0373575	0.06	0.683566	0.00308326	0.0181083	WNT8B	0.0604344	0.0505551	-0.257515	0.250603	0.340807	SPAG5	1.64347	1.81587	0.143913	0.0847832	0.177949
EXOSC7	3.09455	2.86471	-0.111341	0.016309	0.0553118	ZNF638	2.99829	3.09241	0.0445913	0.293283	0.383854	ANKRD13A	2.84132	3.06427	0.108983	0.0176958	0.0611271
KIFAP3	3.26559	3.20376	-0.0275777	0.650464	0.712275	SLC25A40	2.11652	2.13484	0.0124344	0.988938	0.991048	PAG1	1.55762	1.83805	0.238834	0.00711255	0.0325672
MKRN2	3.20422	3.22379	0.00878447	0.850512	0.876342	TIMM21	1.47953	1.70466	0.204342	0.000114708	0.000779873	GPATCH1	1.85854	1.94615	0.0664535	0.298937	0.417284
REXO2	3.74575	3.60046	-0.0570746	0.295292	0.40578	ADD2	0.193619	0.587539	1.60147	3.75396e-11	1.76313e-08	ICAM3	0.75007	1.04371	0.476622	0.132472	0.240847
RBMS2	2.71441	2.83449	0.0624483	0.198033	0.30827	RASAL2	1.94639	2.21579	0.187022	0.00230778	0.00851048	NT5C2	2.72753	2.88241	0.0796808	0.286374	0.405116
BAZ2A	3.55338	3.41169	-0.0587017	0.0743583	0.156852	VPS9D1	3.44686	3.08311	-0.160896	0.000128436	0.000853953	MCAM	3.64916	4.25665	0.222155	2.48199e-06	0.000101754
MLH1	2.98959	3.07043	0.0384921	0.0898509	0.17859	ZNF37A	1.49781	1.69253	0.176324	0.00967709	0.0267537	GPC4	3.30721	3.28497	-0.00973771	0.821197	0.853354
FMO4	1.55945	1.62554	0.0598779	0.467967	0.560038	FNDC3B	3.17538	3.46984	0.12794	0.0152525	0.0383723	MBNL3	1.68978	1.64436	-0.0393079	0.500659	0.591351
KLHL20	2.37607	2.29784	-0.0483035	0.463064	0.556051	FOSL2	4.7903	5.009	0.0644065	0.00663329	0.0198251	CAMSAP3	3.05071	2.56958	-0.247612	0.00154355	0.0113535
RGS11	0.963299	1.20257	0.320065	0.0111405	0.0426108	CACNG5	0.0413167	0.134777	1.70578	0.000797022	0.00367768	RAP1GAP	4.30214	3.57784	-0.265967	7.57883e-06	0.000235857
SLC46A1	0.630895	0.974638	0.627466	1.84577e-09	2.34547e-06	CACNG4	1.71283	2.14451	0.324269	0.0604791	0.113183	XAB2	3.73446	3.73351	-0.000367732	0.68952	0.745105
PLXNA2	3.00073	2.77804	-0.111245	0.102674	0.195435	FRYL	2.0975	2.16012	0.0424385	0.266159	0.357081	ARHGEF1	3.97876	4.19128	0.0750701	0.195528	0.313306
SPAG5	2.04564	1.64347	-0.315808	0.00111395	0.00933225	TMEM131	2.70985	2.79553	0.0449101	0.403911	0.488375	STXBP2	3.52288	3.29738	-0.0954382	0.0170503	0.0595663
ANKRD13A	2.60295	2.84132	0.126412	0.00128216	0.0101599	FSCN1	5.04123	4.92367	-0.0340408	0.455714	0.535288	NMRK2	0.0298133	0.0470717	0.658905	0.420414	0.525105
TPD52	3.82989	3.54707	-0.110676	0.116912	0.21418	ACTB	10.7829	10.8035	0.00274729	0.503955	0.577463	DGKD	2.06264	2.24588	0.122785	0.134838	0.243853
ACACB	1.41776	1.84496	0.379982	2.98972e-06	0.000194373	MOCOS	1.72363	1.29092	-0.417055	5.94822e-06	7.37096e-05	CTTNBP2	1.07825	0.835591	-0.367829	0.0023416	0.0151278
TRAF4	4.69841	4.03233	-0.22056	3.36038e-06	0.000213993	PLD1	2.24398	2.02218	-0.150148	0.143921	0.222331	RARB	1.75985	1.93393	0.136086	0.0898503	0.185359
PAG1	1.33378	1.55762	0.223824	0.0717909	0.153042	WDR62	0.83283	0.730974	-0.188201	0.0259689	0.058144	TOP2B	4.38747	4.54455	0.0507463	0.0388269	0.105071
GPATCH1	1.96984	1.85854	-0.0839097	0.107842	0.202434	DLG1	2.66712	2.68398	0.00909212	0.695808	0.741348	TM9SF3	5.54326	5.46144	-0.0214527	0.364773	0.476675
ICAM3	0.455599	0.75007	0.719261	0.00364712	0.0202863	RAB7A	6.5569	6.66162	0.0228608	0.159759	0.241039	NFKB2	4.22149	4.25143	0.010193	0.613897	0.685009
NT5C2	2.84467	2.72753	-0.0606643	0.156924	0.261737	BCAP29	2.55584	2.71116	0.0851104	0.0294983	0.0644347	PPP1R12B	1.81058	2.09828	0.212751	0.0375518	0.102593
MCAM	3.48801	3.64916	0.0651622	0.189778	0.299641	SART3	2.98543	3.13052	0.068463	0.169874	0.252904	DNAJC10	2.89093	3.0096	0.0580375	0.0396973	0.106751
GPC4	3.28924	3.30721	0.00786056	0.739269	0.7854	ARHGAP15	0.717691	1.24395	0.793497	3.64476e-05	0.000313016	GTF3C1	3.19971	3.41903	0.095649	0.000157976	0.00217513
MBNL3	1.84862	1.68978	-0.129613	0.10961	0.204817	TUBA3D	0.246479	0.291137	0.240233	0.232032	0.321503	IL4R	4.26891	4.42108	0.0505322	0.0269583	0.0820767
CAMSAP3	3.43097	3.05071	-0.169474	0.00193751	0.0132986	PAX2	0.0373575	0.0209772	-0.832574	0.00110819	0.00479024	USP33	2.95141	3.14119	0.0899069	0.0889893	0.184193
RAP1GAP	4.08418	4.30214	0.0750061	0.0412473	0.103893	EXOSC7	3.09455	2.86728	-0.110049	0.00188057	0.00725048	CAPN6	2.66233	2.08408	-0.35328	0.0110581	0.0441647
XAB2	3.93302	3.73446	-0.074735	0.0743583	0.156852	KIFAP3	3.26559	3.38772	0.0529725	0.145449	0.224098	DCX	0.0998356	0.224656	1.17009	0.976324	0.980909
ARHGEF1	4.35168	3.97876	-0.129253	0.00545508	0.0264476	MKRN2	3.20422	3.4196	0.0938536	0.0035013	0.0118516	SNRPA	4.42632	4.49068	0.0208252	0.636528	0.7031
STXBP2	4.014	3.52288	-0.188284	3.32129e-05	0.00101516	MCM6	3.16152	3.3002	0.0619362	0.0659941	0.121184	EXOSC5	3.60528	3.4364	-0.0692144	0.0783894	0.168758
MAP2K7	3.15226	2.97107	-0.0854056	0.0108877	0.0419426	REXO2	3.74575	3.80955	0.0243635	0.143921	0.222331	DYNC1I2	4.07084	4.27162	0.0694591	0.0371348	0.101799
NMRK2	0.0271089	0.0298133	0.137189	0.256264	0.368313	RBM7	1.97932	2.08796	0.0770937	0.0773343	0.137029	APBB1IP	2.28492	2.35712	0.0448815	0.82475	0.856072
DGKD	2.09035	2.06264	-0.0192501	0.819208	0.850008	RBMS2	2.71441	3.01947	0.153654	0.000641348	0.00307783	LRCH4	1.94882	2.10464	0.110978	0.184721	0.301314
CTTNBP2	0.514836	1.07825	1.06651	4.41224e-08	1.04533e-05	BAZ2A	3.55338	3.68648	0.0530549	0.539995	0.608801	FAM76B	1.7106	1.89538	0.147986	0.0608955	0.142708
ACTL6B	0.198186	0.377659	0.930226	0.000363944	0.00458349	PTPN23	3.62655	3.68865	0.024493	0.394606	0.47996	TYR	0.0154226	0.0197058	0.353575	0.0139417	0.0519311
RARB	1.57342	1.75985	0.161546	0.130603	0.230632	MLH1	2.98959	3.29076	0.138473	1.1358e-06	2.02998e-05	POLD3	2.4519	2.39607	-0.0332286	0.165834	0.280272
TOP2B	4.26962	4.38747	0.039284	0.0993392	0.191104	UNG	3.6724	3.66176	-0.00418652	0.592526	0.653622	CAPZB	6.2297	6.54779	0.071845	3.15873e-05	0.000674767
TM9SF3	5.87976	5.54326	-0.0850245	0.0149328	0.0521892	FMO4	1.55945	1.49661	-0.0593362	0.397693	0.482793	GPR137B	3.26114	3.55086	0.122791	0.00429155	0.0228788
NFKB2	4.59638	4.22149	-0.122743	0.0111405	0.0426108	KLHL20	2.37607	2.55282	0.103512	0.0519153	0.100356	NAALAD2	0.290611	0.380324	0.388139	0.0113503	0.0449059
UBE2T	3.51356	2.94266	-0.255812	0.00042397	0.00503933	RGS11	0.963299	1.42687	0.566802	0.000591067	0.00288436	JADE1	2.72694	2.63158	-0.0513507	0.134838	0.243853
PPP1R12B	1.86854	1.81058	-0.0454595	0.81298	0.8448	SLC46A1	0.630895	0.942364	0.578884	5.74427e-07	1.1969e-05	SLC25A43	2.73437	2.90202	0.0858501	0.0266445	0.0814018
DNAJC10	3.06249	2.89093	-0.0831691	0.0730654	0.154908	PLXNA2	3.00073	2.58603	-0.214574	0.000196039	0.00119526	UBE2A	3.5349	3.725	0.0755705	0.0164256	0.0581404
GTF3C1	3.16726	3.19971	0.0147067	0.366937	0.472222	SPAG5	2.04564	1.81587	-0.171894	0.0228108	0.0525725	FGFR1	3.11678	3.52548	0.17776	0.000880476	0.00764028
IL4R	4.48365	4.26891	-0.0708066	0.115052	0.211869	ANKRD13A	2.60295	3.06427	0.235396	1.09677e-08	6.36079e-07	FKBP6	0.0118887	0.010403	-0.192591	0.497224	0.588968
USP33	2.91854	2.95141	0.0161574	0.627537	0.693388	TPD52	3.82989	3.53639	-0.115025	0.104766	0.173671	SMC1B	0.104315	0.175023	0.746593	0.000169967	0.00229183
PAK3	0.476266	1.0215	1.10084	5.4897e-07	5.92548e-05	ACACB	1.41776	1.86729	0.397334	0.00152713	0.00613723	FBLN1	5.30919	5.73647	0.111672	0.0103567	0.0423074
CAPN6	2.29592	2.66233	0.213617	0.122635	0.220957	TRAF4	4.69841	4.06221	-0.209909	2.7015e-08	1.23639e-06	ITGA8	0.917909	1.12687	0.295904	0.0148571	0.0542935
DCX	0.0600419	0.0998356	0.733585	0.00663147	0.0300227	PAG1	1.33378	1.83805	0.462658	1.39144e-05	0.000145865	CST7	2.81595	3.20551	0.186933	0.0367217	0.10098
SNRPA	4.86538	4.42632	-0.136443	0.000112681	0.00219979	GPATCH1	1.96984	1.94615	-0.0174562	0.397693	0.482793	MAP2	1.46037	1.62734	0.156182	0.761414	0.804199
SPAG6	0.0910174	0.185808	1.02959	5.34757e-05	0.00137405	ICAM3	0.455599	1.04371	1.19588	4.21846e-06	5.63708e-05	PIAS2	0.884708	1.04107	0.2348	0.00509276	0.025783
EXOSC5	3.85115	3.60528	-0.0951767	0.030056	0.0835898	MCAM	3.48801	4.25665	0.287317	4.76318e-08	1.90063e-06	AMPH	0.771893	1.21438	0.653746	0.000196562	0.00256213
DYNC1I2	4.14003	4.07084	-0.0243172	0.302755	0.413051	MBNL3	1.84862	1.64436	-0.168921	0.0245214	0.0556158	ARAF	4.53538	4.49923	-0.0115471	0.243389	0.36249
APBB1IP	1.60066	2.28492	0.513475	3.68839e-05	0.00108654	CAMSAP3	3.43097	2.56958	-0.417086	1.03037e-07	3.28732e-06	MCCC1	2.78794	2.59833	-0.101615	0.00149578	0.0111132
LRCH4	2.08474	1.94882	-0.0972664	0.149994	0.253276	RAP1GAP	4.08418	3.57784	-0.19096	0.0367952	0.0766233	FAP	2.42086	3.17027	0.389087	2.16907e-06	9.15286e-05
FAM76B	1.81105	1.7106	-0.0823259	0.463064	0.556051	XAB2	3.93302	3.73351	-0.0751027	0.0152525	0.0383723	NEBL	1.97368	1.84217	-0.0994841	0.444409	0.545522
SIRT6	3.59726	3.15209	-0.190589	0.000663099	0.00668262	ARHGEF1	4.35168	4.19128	-0.0541831	0.0945072	0.160044	ACER3	2.20948	2.23619	0.0173396	0.676116	0.734271
TYR	0.00672148	0.0154226	1.19819	0.320266	0.429954	STXBP2	4.014	3.29738	-0.283722	1.99906e-09	1.94146e-07	UBE2K	3.88178	4.07595	0.0704164	0.0302758	0.0884314
ACTN2	0.11468	0.149529	0.382818	0.00713155	0.0315458	MAP2K7	3.15226	3.0269	-0.0585438	0.0150209	0.0378896	PIK3C3	1.41153	1.54519	0.130528	0.0150456	0.0547707
GPR137B	3.35553	3.26114	-0.0411658	0.588276	0.660741	NMRK2	0.0271089	0.0470717	0.796094	0.0585338	0.110416	N4BP2	1.10382	1.27864	0.212106	0.0158211	0.0567489
NAALAD2	0.200603	0.290611	0.53475	0.00374173	0.0206197	DGKD	2.09035	2.24588	0.103535	0.182274	0.267213	C12orf5	2.05133	2.13275	0.0561539	0.0723936	0.159833
JADE1	2.36972	2.72694	0.202564	0.000387057	0.00475695	CTTNBP2	0.514836	0.835591	0.698684	6.91539e-05	0.00052111	TULP3	2.89542	3.06533	0.0822683	0.00387876	0.0213472
SLC25A43	2.95256	2.73437	-0.110761	0.00730483	0.0320537	ACTL6B	0.198186	0.733096	1.88714	0.00266507	0.00955991	SYNJ2	2.30137	2.52212	0.13214	0.00183232	0.0127912
UBE2A	3.79623	3.5349	-0.102898	0.000221527	0.00336943	RARB	1.57342	1.93393	0.297632	0.00167942	0.00662565	ADCY2	0.26528	0.470363	0.826259	0.000107035	0.00163483
FGFR1	2.56381	3.11678	0.281769	4.09382e-05	0.00117261	TOP2B	4.26962	4.54455	0.0900303	0.000603282	0.00293049	PPP2R5C	3.0304	3.20862	0.0824445	0.00619672	0.0295857
SMC1B	0.129296	0.104315	-0.309728	0.188426	0.298686	TM9SF3	5.87976	5.46144	-0.106477	0.000461379	0.00236636	PMS2P1	2.57271	2.75796	0.100311	0.096067	0.194133
FBLN1	4.47518	5.30919	0.246548	0.000478313	0.00544008	NFKB2	4.59638	4.25143	-0.11255	0.0231444	0.0531788	RBFOX1	0.017976	0.0244505	0.443791	0.550719	0.633338
ITGA8	0.671864	0.917909	0.450181	0.026591	0.0772179	UBE2T	3.51356	2.94939	-0.252518	2.72309e-05	0.000249733	GNB1	5.81134	6.06733	0.0621913	0.000133844	0.00192817
CST7	2.48215	2.81595	0.182032	0.104374	0.197716	PPP1R12B	1.86854	2.09828	0.167291	0.118484	0.191071	HOXA9	0.187251	0.279759	0.579215	0.0056996	0.0278681
MAP2	0.85931	1.46037	0.765083	3.17733e-07	3.79596e-05	GTF3C1	3.16726	3.41903	0.110356	1.46347e-05	0.00015197	EDN1	3.32216	3.44817	0.0537089	0.218518	0.337469
PIAS2	0.835178	0.884708	0.0831171	0.159287	0.264605	USP33	2.91854	3.14119	0.106064	0.0248766	0.0562299	MLLT10	2.078	2.2749	0.130613	0.0192856	0.0648522
AMPH	0.501	0.771893	0.623589	4.86497e-05	0.00128793	PAK3	0.476266	1.07319	1.17206	3.22953e-05	0.000282695	ZCWPW1	1.21309	1.35889	0.163745	0.10554	0.206662
ARAF	4.70706	4.53538	-0.0536027	0.0374216	0.0969653	CAPN6	2.29592	2.08408	-0.139663	0.558486	0.62439	ADCYAP1R1	0.261559	0.487973	0.899667	0.0031131	0.0183859
MCCC1	2.60939	2.78794	0.0954895	0.00784757	0.0336019	DCX	0.0600419	0.224656	1.90368	0.0106483	0.0288938	FGF20	0.626444	0.487235	-0.362568	0.117869	0.222695
LAMP3	1.76078	1.99485	0.180071	0.1433	0.245683	SNRPA	4.86538	4.49068	-0.115618	2.65722e-05	0.000244711	P2RY10	0.84788	1.15644	0.447754	0.15897	0.272608
FAP	2.15285	2.42086	0.169271	0.0977045	0.18917	SPAG6	0.0910174	0.331917	1.86661	0.000118409	0.00080142	ITM2A	3.15898	3.2493	0.0406695	0.43899	0.541303
NEBL	2.22009	1.97368	-0.16973	0.030056	0.0835898	EXOSC5	3.85115	3.4364	-0.164391	0.000114708	0.000779873	NRD1	4.02124	4.24879	0.0794113	1.75389e-05	0.000436656
ACER3	2.26832	2.20948	-0.037919	0.733223	0.780816	DYNC1I2	4.14003	4.27162	0.045142	0.518217	0.590264	TNRC6C	1.40256	1.62177	0.209503	0.00454494	0.0238535
UBE2K	4.05848	3.88178	-0.0642178	0.060021	0.135177	APBB1IP	1.60066	2.35712	0.558356	5.73286e-05	0.00044766	CBFA2T2	1.88549	2.1707	0.203219	2.80057e-05	0.000619019
PIK3C3	1.28908	1.41153	0.130917	0.0156076	0.0537611	LRCH4	2.08474	2.10464	0.0137114	0.615736	0.673571	BRINP1	0.334234	0.562466	0.750907	0.0514981	0.127389
N4BP2	0.986759	1.10382	0.161739	0.0633709	0.140269	FAM76B	1.81105	1.89538	0.0656598	0.322203	0.412195	ITCH	3.19023	3.43712	0.107538	0.0020411	0.0137679
SYNJ2	2.41026	2.30137	-0.0666916	0.487863	0.577544	SIRT6	3.59726	3.12929	-0.201062	4.97453e-05	0.000401692	PKD2L2	0.0415126	0.0638586	0.62133	0.0188191	0.0637059
ADCY2	0.250704	0.26528	0.0815322	0.379853	0.483679	TYR	0.00672148	0.0197058	1.55177	0.00277408	0.00983508	TP53INP2	3.4185	3.66113	0.0989242	0.0266445	0.0814018
PPP2R5C	3.09244	3.0304	-0.0292347	0.662055	0.722025	ACTN2	0.11468	0.171783	0.582981	0.00112117	0.00483101	SDF4	5.10846	5.19197	0.0233925	0.296818	0.415257
PMS2P1	2.85511	2.57271	-0.150256	0.00337621	0.0192231	CAPZB	6.27516	6.54779	0.061354	0.00177738	0.00693288	MYH7B	0.312276	0.347833	0.155574	0.0236761	0.0749762
GNB1	5.71755	5.81134	0.023475	0.273648	0.385163	GPR137B	3.35553	3.55086	0.0816255	0.0736872	0.131971	BPIFB2	0.07187	0.17441	1.27902	0.0229034	0.0733692
HOXA9	0.26289	0.187251	-0.489488	0.472899	0.564418	NAALAD2	0.200603	0.380324	0.922889	9.62397e-09	5.76834e-07	TP73	0.40082	0.422323	0.0753933	0.557403	0.638837
EDN1	3.06945	3.32216	0.114142	0.200842	0.311394	JADE1	2.36972	2.63158	0.151213	0.0224814	0.051968	TOLLIP	3.84053	3.78002	-0.0229126	0.096067	0.194133
ADCYAP1R1	0.140024	0.261559	0.901464	0.000201467	0.00318744	SLC25A43	2.95256	2.90202	-0.0249105	0.201134	0.288124	UBE2D4	2.23999	2.21409	-0.0167729	0.682806	0.739805
FGF20	0.798801	0.626444	-0.35065	0.350147	0.457053	UBE2A	3.79623	3.725	-0.027327	0.0393699	0.0807459	CLUL1	0.316926	0.297835	-0.0896305	0.00619672	0.0295857
P2RY10	0.512223	0.84788	0.727089	0.0142839	0.0507396	FGFR1	2.56381	3.52548	0.459529	2.13229e-11	1.38841e-08	RUNX1T1	0.758955	0.994303	0.389671	0.00382283	0.0211627
ITM2A	2.62844	3.15898	0.265254	0.00969897	0.0387405	FKBP6	0.0215122	0.010403	-1.04815	0.203232	0.290288	CDH17	2.94438	2.67035	-0.140931	0.417695	0.522759
NRD1	4.10122	4.02124	-0.028412	0.192501	0.302627	SMC1B	0.129296	0.175023	0.436865	0.0668148	0.122214	THOC1	1.70082	1.86802	0.135279	0.0106324	0.0429656
VDAC3	4.51558	4.4271	-0.0285494	0.306534	0.416802	FBLN1	4.47518	5.73647	0.358219	7.82156e-08	2.68368e-06	FKBP7	2.38865	2.80556	0.232095	0.000133844	0.00192817
PCM1	2.83606	2.98832	0.0754488	0.0152669	0.0529662	ITGA8	0.671864	1.12687	0.746085	1.77235e-06	2.88166e-05	OSBPL6	0.382648	0.562377	0.55552	0.00365941	0.0205404
TNRC6C	1.22835	1.40256	0.191339	0.0113984	0.0432717	CST7	2.48215	3.20551	0.368964	0.000175572	0.0010947	SLC1A3	1.79724	2.07307	0.205987	0.0654323	0.149365
CBFA2T2	2.01777	1.88549	-0.0978184	0.184418	0.293732	MAP2	0.85931	1.62734	0.921266	8.5673e-07	1.63309e-05	XRCC5	5.62159	5.72454	0.0261812	0.260392	0.379354
BRINP1	0.237205	0.334234	0.494723	0.0508412	0.120696	PIAS2	0.835178	1.04107	0.317917	4.63201e-05	0.00037938	LXN	4.25931	4.59234	0.10861	0.00320653	0.0188039
ITCH	3.2889	3.19023	-0.0439456	0.195253	0.305434	AMPH	0.501	1.21438	1.27734	1.5262e-10	4.2452e-08	SP140	0.863913	1.20075	0.474983	0.10456	0.205371
PKD2L2	0.0567659	0.0415126	-0.451473	0.0428678	0.106772	ARAF	4.70706	4.49923	-0.0651498	0.00144197	0.00587242	MKNK1	2.37175	2.30818	-0.0391956	0.260392	0.379354
TP53INP2	3.39469	3.4185	0.0100848	0.757503	0.800058	LAMP3	1.76078	1.99019	0.176695	0.199186	0.285877	TNS1	4.02157	4.33446	0.108093	0.020999	0.0688057
MYH7B	0.408064	0.312276	-0.385975	0.00573051	0.0272824	FAP	2.15285	3.17027	0.558358	1.37703e-08	7.42971e-07	REXO1	2.79047	2.87346	0.0422831	0.542172	0.625808
BPIFB2	0.221998	0.07187	-1.62709	0.0192917	0.0623436	NEBL	2.22009	1.84217	-0.269214	0.000939228	0.00418555	SAR1A	3.89698	4.12407	0.0817131	0.000105046	0.00161074
TP73	0.455662	0.40082	-0.185011	0.159287	0.264605	ACER3	2.26832	2.23619	-0.0205794	0.944732	0.954224	CDC14A	1.04988	1.21928	0.215805	0.047786	0.121072
TOLLIP	3.85459	3.84053	-0.00527267	0.528987	0.611974	PIK3C3	1.28908	1.54519	0.261444	1.35671e-05	0.000143219	RAPGEF3	1.48165	1.5981	0.109146	0.15102	0.262809
UBE2D4	2.08444	2.23999	0.103828	0.00545508	0.0264476	N4BP2	0.986759	1.27864	0.373845	0.000112134	0.000766557	CEACAM1	3.42971	3.50601	0.0317435	0.666129	0.726595
CLUL1	0.178353	0.316926	0.829412	2.17159e-05	0.000759811	C12orf5	2.06951	2.13275	0.0434264	0.232032	0.321503	SENP1	1.84933	2.0233	0.129705	0.00793079	0.0350367
RUNX1T1	0.592349	0.758955	0.357566	0.00904258	0.0369091	TULP3	2.99118	3.06533	0.0353276	0.0367952	0.0766233	CIC	3.27719	3.48914	0.0904122	0.0056996	0.0278681
CDH17	3.49828	2.94438	-0.248684	0.1433	0.245683	SYNJ2	2.41026	2.52212	0.0654484	0.0902139	0.154546	LIPE	1.22863	1.53055	0.317001	0.0443015	0.114923
THOC1	1.9537	1.70082	-0.199985	0.00121224	0.00980032	ADCY2	0.250704	0.470363	0.907791	2.29276e-05	0.000216148	FDFT1	4.72978	4.59164	-0.0427637	0.0731219	0.161037
FKBP7	2.24117	2.38865	0.0919453	0.0913796	0.180589	PPP2R5C	3.09244	3.20862	0.0532097	0.0773343	0.137029	PAFAH1B3	3.98219	3.87684	-0.0386801	0.21176	0.330404
OSBPL6	0.304209	0.382648	0.330954	0.000523261	0.00576252	PMS2P1	2.85511	2.75796	-0.0499447	0.133572	0.209989	OPHN1	0.921042	1.00112	0.120272	0.270185	0.389293
SLC1A3	1.21469	1.79724	0.565195	0.00135578	0.0105021	GNB1	5.71755	6.06733	0.0856663	5.46868e-05	0.000432333	AFM	0.0739359	0.0450074	-0.716112	2.34882e-06	9.77582e-05
XRCC5	5.79676	5.62159	-0.0442677	0.104374	0.197716	HOXA9	0.26289	0.279759	0.0897269	0.150105	0.229545	KIF22	3.09732	3.17015	0.0335272	0.460895	0.559613
LXN	4.031	4.25931	0.0794806	0.0730654	0.154908	EDN1	3.06945	3.44817	0.167851	0.0241707	0.0549857	SCGN	3.86722	3.67807	-0.0723479	0.455362	0.554814
SP140	0.686331	0.863913	0.331981	0.0412473	0.103893	MLLT10	2.07044	2.2749	0.135866	0.0348401	0.0734974	LRRC16A	2.50148	2.4429	-0.034191	0.623553	0.692735
MKNK1	2.00331	2.37175	0.24357	4.86497e-05	0.00128793	ZCWPW1	1.23854	1.35889	0.133788	0.0290867	0.0637009	PGM1	4.53223	4.43988	-0.0296988	0.509411	0.598631
TNS1	3.35127	4.02157	0.263051	8.08979e-05	0.0017724	ADCYAP1R1	0.140024	0.487973	1.80113	9.01356e-09	5.47115e-07	DDX1	4.52567	4.57863	0.0167868	0.652906	0.715906
REXO1	2.92712	2.79047	-0.0689733	0.107842	0.202434	FGF20	0.798801	0.487235	-0.713218	0.0294983	0.0644347	DNM2	4.02033	4.08999	0.0247837	0.597952	0.672175
CDC14A	0.797461	1.04988	0.396744	0.000682837	0.00680307	P2RY10	0.512223	1.15644	1.17484	0.000204837	0.00123523	EPB41L2	3.0092	3.38638	0.170364	0.00302216	0.0180355
RAPGEF3	1.9196	1.48165	-0.373596	0.00164524	0.0119808	ITM2A	2.62844	3.2493	0.305923	0.00252993	0.00916224	MOXD1	3.09278	3.43755	0.152477	0.0688407	0.154518
CEACAM1	4.13728	3.42971	-0.270598	0.000251201	0.0036462	NRD1	4.10122	4.24879	0.0509993	0.04266	0.0859923	STX7	2.36209	2.59312	0.134623	0.00859877	0.0370854
SENP1	1.8132	1.84933	0.0284647	0.610573	0.678964	VDAC3	4.51558	4.48744	-0.00901861	0.479504	0.556095	RABL2B	1.62096	1.84611	0.187636	0.000211281	0.00270507
DUSP13	0.0553329	0.0317155	-0.802952	0.163067	0.269284	PCM1	2.83606	3.09856	0.127712	0.00167942	0.00662565	KEAP1	4.33245	4.32305	-0.00313361	0.379448	0.489361
CIC	3.24459	3.27719	0.014426	0.544851	0.624999	TNRC6C	1.22835	1.62177	0.400842	1.16809e-06	2.07604e-05	DDX43	0.70871	0.561571	-0.335728	0.197109	0.314973
LIPE	1.13465	1.22863	0.114795	0.424889	0.522693	CBFA2T2	2.01777	2.1707	0.1054	0.00308906	0.0107223	PTPRH	3.79643	3.67463	-0.0470452	0.515289	0.603194
FDFT1	4.99549	4.72978	-0.0788541	0.0993392	0.191104	BRINP1	0.237205	0.562466	1.24563	3.15206e-05	0.000277866	DCT	0.0315063	0.0506114	0.683821	0.024102	0.0759473
PAFAH1B3	4.28883	3.98219	-0.107024	0.0944996	0.184692	ITCH	3.2889	3.43712	0.0635924	0.0891655	0.15319	CRYBG3	1.29986	1.45158	0.159275	0.124444	0.230817
OPHN1	0.915965	0.921042	0.00797403	0.751409	0.795034	TP53INP2	3.39469	3.66113	0.109009	0.0282785	0.0622593	EPHA6	0.159526	0.169552	0.0879392	0.359961	0.472076
AFM	0.0285018	0.0739359	1.37522	6.37733e-05	0.00152333	SDF4	5.03145	5.19197	0.0453065	0.0676439	0.123471	SCTR	4.08597	2.92982	-0.479868	7.57883e-06	0.000235857
KIF22	3.40147	3.09732	-0.135134	0.0202476	0.0642791	MYH7B	0.408064	0.347833	-0.230401	0.319499	0.409504	RFX3	0.907389	1.08835	0.262351	0.0584222	0.138728
SCGN	2.37534	3.86722	0.703163	2.17159e-05	0.000759811	BPIFB2	0.221998	0.17441	-0.348068	0.521045	0.593226	RIF1	1.90057	2.07863	0.129199	0.0093166	0.0393074
LRRC16A	2.79604	2.50148	-0.160603	0.0557841	0.128386	TP73	0.455662	0.422323	-0.109618	0.344366	0.433026	RAB21	2.2713	2.50971	0.144004	0.000261891	0.00317633
PGM1	4.40082	4.53223	0.0424481	0.20368	0.314226	TOLLIP	3.85459	3.78002	-0.0281853	0.062794	0.116617	SLC4A4	4.97113	2.89352	-0.78075	1.23092e-10	4.61782e-08
DNM2	4.50027	4.02033	-0.162699	0.00042397	0.00503933	UBE2D4	2.08444	2.21409	0.0870556	0.0162104	0.0402032	SMARCA2	3.80038	4.00575	0.0759295	0.0839616	0.176793
EPB41L2	2.73799	3.0092	0.136262	0.0404567	0.102437	CLUL1	0.178353	0.297835	0.739781	0.24529	0.335285	RDH8	0.0348688	0.0398614	0.193055	0.00417138	0.0224391
RIMS1	0.0348957	0.0353227	0.0175435	0.00968275	0.0387405	RUNX1T1	0.592349	0.994303	0.747237	1.07377e-06	1.94953e-05	SESN1	2.54108	2.84843	0.164723	0.0367217	0.10098
MOXD1	2.36113	3.09278	0.389426	0.000813206	0.00755784	CDH17	3.49828	2.67035	-0.389615	0.0378074	0.0783212	MID2	1.59168	1.72664	0.117421	0.00272261	0.0167479
KEAP1	4.44561	4.33245	-0.0371988	0.287954	0.398951	THOC1	1.9537	1.86802	-0.0647061	0.153272	0.233242	PIH1D3	0.0122255	0.0316462	1.37213	0.0714768	0.158781
DDX43	0.583214	0.70871	0.281172	0.0547647	0.12681	FKBP7	2.24117	2.80556	0.32404	8.09464e-07	1.56064e-05	COL5A3	2.16162	2.8616	0.404705	3.78496e-06	0.000140836
PTPRH	4.28628	3.79643	-0.175082	0.0133571	0.0484069	OSBPL6	0.304209	0.562377	0.886475	7.39964e-09	4.62881e-07	SRCAP	3.47437	3.54156	0.0276339	0.509411	0.598631
DCT	0.024684	0.0315063	0.352062	0.027703	0.0793013	SLC1A3	1.21469	2.07307	0.771182	3.02902e-07	7.34192e-06	KIAA0020	3.2354	3.36562	0.0569313	0.0839616	0.176793
SLC35C2	3.44198	3.22295	-0.0948552	0.00458265	0.0235199	XRCC5	5.79676	5.72454	-0.0180866	0.407042	0.490793	CPB2	0.261253	0.15348	-0.767393	1.11713e-06	5.63498e-05
CRYBG3	1.13241	1.29986	0.198953	0.12657	0.225749	LXN	4.031	4.59234	0.188091	4.81735e-06	6.23384e-05	CHRNA3	0.537973	0.963981	0.841471	0.000675772	0.00635532
EPHA6	0.103029	0.159526	0.630735	0.00748165	0.0325293	SP140	0.686331	1.20075	0.806965	0.000667955	0.00317836	CNOT4	1.95322	2.047	0.0676613	0.14589	0.257068
SCTR	3.10802	4.08597	0.394684	0.000625078	0.00644001	MKNK1	2.00331	2.30818	0.204375	8.52059e-05	0.000613662	PSEN1	3.39869	3.4692	0.0296227	0.723453	0.773683
RFX3	0.788729	0.907389	0.202192	0.0294528	0.0825779	TNS1	3.35127	4.33446	0.371144	5.67851e-09	3.87355e-07	CPOX	2.42327	2.70471	0.158519	0.000420191	0.00452868
RIF1	1.92997	1.90057	-0.0221464	0.856803	0.880973	REXO1	2.92712	2.87346	-0.0266901	0.247551	0.337553	CLDND1	3.22996	3.66057	0.180553	8.65558e-09	1.26086e-06
RAB21	2.32664	2.2713	-0.0347307	0.411061	0.511148	SAR1A	4.00847	4.12407	0.0410151	0.0221561	0.0514028	MOK	1.22643	1.30627	0.0909927	0.284315	0.403057
SLC4A4	3.42355	4.97113	0.538083	2.98972e-06	0.000194373	CDC14A	0.797461	1.21928	0.612549	1.96316e-08	9.81581e-07	HSP90AA1	7.3266	7.55314	0.0439331	0.0634549	0.146673
SMARCA2	3.57533	3.80038	0.0880657	0.0211281	0.0662022	RAPGEF3	1.9196	1.5981	-0.26445	0.0164579	0.0406623	RBL1	1.18833	1.31046	0.141146	0.0898503	0.185359
SESN1	2.1764	2.54108	0.223501	0.000132681	0.00242593	CEACAM1	4.13728	3.50601	-0.238855	0.000833569	0.00380707	DLGAP4	3.56067	3.77387	0.0838976	0.00467664	0.024298
MID2	1.33002	1.59168	0.259105	0.0428678	0.106772	SENP1	1.8132	2.0233	0.15817	0.00112117	0.00483101	IGSF9B	0.650159	0.702638	0.11199	0.463676	0.561794
COL5A3	2.1752	2.16162	-0.00903088	0.782024	0.819486	DUSP13	0.0553329	0.040045	-0.466515	0.0759623	0.135125	CROCCP3	0.570619	0.656279	0.20178	0.136033	0.24527
SRCAP	3.64539	3.47437	-0.0693223	0.0271433	0.0782206	CIC	3.24459	3.48914	0.104838	0.000501324	0.00252158	NDC80	1.58203	1.69139	0.0964281	0.258463	0.377468
CHRNA3	0.375945	0.537973	0.517011	0.00121224	0.00980032	LIPE	1.13465	1.53055	0.431796	0.0145671	0.0370318	AP4E1	1.37875	1.56238	0.180383	0.00063202	0.00604769
KCNN2	0.198073	0.315031	0.669458	0.000243452	0.00356332	FDFT1	4.99549	4.59164	-0.121618	0.000480965	0.00244147	RSBN1	2.09674	2.20785	0.0744962	0.288443	0.407033
CNOT4	1.94839	1.95322	0.00357004	0.703248	0.756532	PAFAH1B3	4.28883	3.87684	-0.145704	0.00195239	0.00745911	MAGI3	1.79468	1.70734	-0.0719806	0.278199	0.397245
PSEN1	3.62292	3.39869	-0.0921718	0.0136599	0.0491097	OPHN1	0.915965	1.00112	0.128246	0.203095	0.290136	AFP	0.0957131	0.0771583	-0.310895	0.00109102	0.00889777
CPOX	2.72512	2.42327	-0.169366	0.00135578	0.0105021	KIF22	3.40147	3.17015	-0.101607	0.0282785	0.0622593	COL4A4	0.968864	1.10158	0.185206	0.343435	0.457168
CLDND1	3.40351	3.22996	-0.0755077	0.0730654	0.154908	SCGN	2.37534	3.67807	0.630815	0.0143448	0.0365964	OSTM1	2.50868	2.94205	0.229894	6.24734e-06	0.00020663
MOK	1.59983	1.22643	-0.383461	0.000177365	0.00292186	LRRC16A	2.79604	2.4429	-0.194794	0.00641446	0.019302	IMPG2	0.0768836	0.120862	0.652612	0.000516064	0.00521125
HSP90AA1	7.59327	7.3266	-0.0515781	0.0239725	0.0721239	PGM1	4.40082	4.43988	0.0127492	0.407042	0.490793	PCNP	4.80525	5.10287	0.0866983	0.000155105	0.0021551
RBL1	1.08745	1.18833	0.127982	0.0622375	0.138594	DDX1	4.572	4.57863	0.00209147	0.905088	0.920739	EXD2	2.45167	2.52194	0.0407747	0.643058	0.7082
DLGAP4	3.73407	3.56067	-0.0686003	0.0868554	0.174309	DNM2	4.50027	4.08999	-0.137915	0.000109615	0.000752026	ARG2	0.957183	1.36633	0.513436	0.000276212	0.00331188
IGSF9B	0.926497	0.650159	-0.510994	0.0119302	0.0446898	EPB41L2	2.73799	3.38638	0.306626	1.67187e-07	4.70985e-06	MEF2C	1.68158	2.06107	0.293575	0.00360636	0.0203511
CROCCP3	0.571593	0.570619	-0.0024594	0.907425	0.924051	RIMS1	0.0348957	0.0668886	0.938708	0.00243737	0.00890206	PTPRC	2.5913	3.01747	0.219663	0.144629	0.255685
NDC80	1.94007	1.58203	-0.29433	0.00969897	0.0387405	MOXD1	2.36113	3.43755	0.541904	7.13115e-08	2.51301e-06	STK17B	2.84789	3.32988	0.225575	7.61355e-05	0.00128707
RSBN1	1.89663	2.09674	0.144708	0.00679602	0.0305008	STX7	2.38797	2.59312	0.118907	0.00541475	0.0168806	CDC14B	1.833	1.74769	-0.0687587	0.252736	0.371501
MAGI3	1.69993	1.79468	0.0782509	0.236842	0.348802	RABL2B	1.67203	1.84611	0.142884	0.0119011	0.0315594	ZNF510	1.4223	1.55768	0.131175	0.218518	0.337469
CXCL2	2.65262	2.87858	0.11794	0.411061	0.511148	KEAP1	4.44561	4.32305	-0.0403324	0.0199918	0.0473907	LRP2	0.0275935	0.0329772	0.257139	0.903677	0.919989
AFP	0.0827453	0.0957131	0.210039	0.160204	0.266001	PTPRH	4.28628	3.67463	-0.222127	0.00184558	0.00714248	ZNF506	1.38419	1.52325	0.138109	0.0674602	0.152481
COL4A4	0.747853	0.968864	0.373539	0.00573051	0.0272824	DCT	0.024684	0.0506114	1.03588	1.39126e-05	0.000145865	JMJD4	2.04025	2.06457	0.0170951	0.789394	0.827053
TCF7	1.54898	1.62211	0.0665587	0.406512	0.507319	SLC35C2	3.44198	3.23648	-0.0888119	0.000249218	0.00144273	DUSP12	2.93213	3.09303	0.0770712	0.0228435	0.0731857
OSTM1	2.3417	2.50868	0.0993745	0.0339022	0.0906783	CRYBG3	1.13241	1.45158	0.358228	0.000833569	0.00380707	AACS	1.8893	1.8585	-0.0237111	0.38692	0.49617
CDH7	0.00403987	0.00463154	0.197182	0.625859	0.692876	EPHA6	0.103029	0.169552	0.718675	0.00070978	0.00334247	SLC13A1	0.0207751	0.0116942	-0.829058	8.00157e-05	0.00134025
IMPG2	0.0653365	0.0768836	0.234787	0.0825137	0.16829	SCTR	3.10802	2.92982	-0.0851842	0.465824	0.544222	CADPS2	2.85188	2.64745	-0.107313	0.138448	0.248088
PCNP	4.83342	4.80525	-0.00843277	0.93927	0.950249	RFX3	0.788729	1.08835	0.464542	7.94999e-05	0.000580742	PCDHB4	1.06696	1.32021	0.307253	0.0343244	0.0963123
EXD2	2.32289	2.45167	0.0778419	0.0668738	0.14559	RIF1	1.92997	2.07863	0.107053	0.0383223	0.0791588	PCDHA6	0.104705	0.129473	0.306332	0.623553	0.692735
ARG2	1.01059	0.957183	-0.0783246	0.869412	0.89125	RAB21	2.32664	2.50971	0.109273	0.0575029	0.108844	PCDHGA2	0.337966	0.51928	0.619636	0.000111119	0.00168221
MEF2C	1.31021	1.68158	0.360025	0.00139403	0.0107035	SLC4A4	3.42355	2.89352	-0.242667	0.0612427	0.114254	HSPB11	2.42779	2.56346	0.0784448	0.052602	0.129221
PTPRC	1.86606	2.5913	0.473681	0.00204507	0.0137698	SMARCA2	3.57533	4.00575	0.163995	0.000157127	0.00100238	PHLPP1	1.55608	1.37442	-0.179088	0.00350237	0.019977
CACNA1S	0.0109851	0.0141635	0.366626	0.129623	0.229831	RDH8	0.0226352	0.0398614	0.816424	0.123458	0.197425	ATP8B1	3.73474	3.30139	-0.177935	0.00237737	0.0152582
PKP1	2.02055	1.46993	-0.458999	0.0853881	0.172305	SESN1	2.1764	2.84843	0.388225	2.3316e-06	3.56269e-05	IL12RB2	0.232999	0.168863	-0.464473	0.0254206	0.0788324
UBA5	2.51279	2.50006	-0.00732314	0.996801	0.997443	MID2	1.33002	1.72664	0.376526	4.81735e-06	6.23384e-05	WDR70	2.06156	2.15118	0.0613902	0.167233	0.281785
STK17B	2.83056	2.84789	0.00880439	0.739269	0.7854	PIH1D3	0.0134974	0.0316462	1.22935	0.292443	0.383385	FYB	2.20699	2.42128	0.133692	0.232497	0.351643
CDC14B	1.87125	1.833	-0.0297938	0.577271	0.651759	COL5A3	2.1752	2.8616	0.395674	3.07637e-05	0.000273126	MPP4	0.0318256	0.056448	0.826737	2.2178e-06	9.30389e-05
ZNF510	1.32438	1.4223	0.102904	0.0680763	0.147553	SRCAP	3.64539	3.54156	-0.0416883	0.0727978	0.13082	BZW1	3.58953	3.91281	0.124408	0.000115351	0.00172717
LRP2	0.0409116	0.0275935	-0.568182	0.715125	0.766308	CPB2	0.27136	0.15348	-0.822153	0.0852603	0.148061	PGR	0.426657	0.62453	0.549693	0.0150456	0.0547707
JMJD4	2.21715	2.04025	-0.119963	0.0193993	0.0623436	CHRNA3	0.375945	0.963981	1.35848	1.37703e-08	7.42971e-07	C1QTNF3	2.36114	3.11432	0.39943	0.000543032	0.00539995
DUSP12	3.25815	2.93213	-0.152101	0.000411315	0.00494995	KCNN2	0.198073	0.329689	0.735069	7.94999e-05	0.000580742	ME2	1.97152	2.09751	0.0893678	0.156286	0.269215
AACS	2.00948	1.8893	-0.08897	0.130603	0.230632	CNOT4	1.94839	2.047	0.0712313	0.0978334	0.164539	C5orf22	2.47058	2.56983	0.0568274	0.268207	0.387278
KIAA0141	3.42921	3.2455	-0.0794359	0.00883277	0.0363826	PSEN1	3.62292	3.4692	-0.0625491	0.00983398	0.0270855	CCNT2	2.2988	2.47938	0.1091	0.029929	0.0877929
CADPS2	2.85187	2.85188	6.29887e-06	0.850512	0.876342	CPOX	2.72512	2.70471	-0.0108473	0.667336	0.717499	FAM135A	1.8376	1.74035	-0.0784439	0.417695	0.522759
PCDHB4	0.932601	1.06696	0.194177	0.0255153	0.0751798	CLDND1	3.40351	3.66057	0.105045	0.00226555	0.00838281	COL19A1	0.0404049	0.121599	1.58953	0.138269	0.248088
PCDHA6	0.0527155	0.104705	0.990026	6.61126e-05	0.00155456	MOK	1.59983	1.30627	-0.292468	0.00112117	0.00483101	EPB41L3	1.77447	2.26987	0.355222	0.00136053	0.0104135
PCDHGA2	0.317883	0.337966	0.0883795	0.329856	0.438345	HSP90AA1	7.59327	7.55314	-0.00764492	0.521815	0.593371	COBLL1	1.77814	1.71401	-0.0529883	0.103588	0.204106
HSPB11	2.60871	2.42779	-0.103693	0.0547647	0.12681	RBL1	1.08745	1.31046	0.269128	0.000191774	0.00117411	DLG3	3.50351	3.13312	-0.161199	1.61506e-05	0.000410678
PHLPP1	1.45514	1.55608	0.0967504	0.0868554	0.174309	DLGAP4	3.73407	3.77387	0.0152972	0.525425	0.596601	KCNK2	0.589276	0.873714	0.568217	0.0242455	0.0761634
IL12RB2	0.0862813	0.232999	1.43321	1.66862e-07	2.49454e-05	IGSF9B	0.926497	0.702638	-0.399005	0.0152525	0.0383723	SERTAD4	1.26689	1.26904	0.00244341	0.782372	0.821204
SMARCD3	2.31747	2.71987	0.230982	0.00178589	0.0126236	CROCCP3	0.571593	0.656279	0.19932	0.146989	0.225888	TRAF5	1.91478	2.18004	0.187177	0.00393544	0.0215767
WDR70	2.18706	2.06156	-0.0852561	0.10961	0.204817	NDC80	1.94007	1.69139	-0.197902	0.0597233	0.112088	MRPL22	2.11556	2.16844	0.0356199	0.460895	0.559613
FYB	1.67652	2.20699	0.396609	0.00883277	0.0363826	AP4E1	1.4238	1.56238	0.133995	0.0205905	0.0484412	GEMIN5	2.1654	2.39545	0.145659	0.000543032	0.00539995
MPP4	0.0395262	0.0318256	-0.312624	0.0717513	0.153042	RSBN1	1.89663	2.20785	0.219204	0.000107149	0.000737757	OPRK1	0.0300916	0.0321425	0.0951242	0.200836	0.319475
BZW1	3.91575	3.58953	-0.125492	0.00253235	0.0158946	MAGI3	1.69993	1.70734	0.00627026	0.98009	0.984005	NFE2L1	5.55193	5.9342	0.0960622	1.34572e-06	6.39824e-05
PGR	0.28915	0.426657	0.561261	0.000912567	0.0081847	CXCL2	2.65262	2.74752	0.050712	0.496902	0.571416	SEMA5B	0.459999	0.545158	0.245043	0.241549	0.36075
C1QTNF3	2.2811	2.36114	0.0497553	0.599377	0.670087	AFP	0.0827453	0.0771583	-0.100856	0.202548	0.289932	GSK3B	2.96313	3.1599	0.0927554	0.0207464	0.0682557
ME2	1.75105	1.97152	0.17109	0.00647475	0.0295331	COL4A4	0.747853	1.10158	0.558745	0.00177738	0.00693288	ITGB5	5.38931	5.68567	0.0772296	0.00741006	0.0335369
C5orf22	2.60433	2.47058	-0.0760638	0.0730654	0.154908	TCF7	1.54898	1.71237	0.144682	0.529049	0.600002	ERC1	2.19839	2.31129	0.072249	0.0621643	0.144786
CCNT2	2.4524	2.2988	-0.0933168	0.0508412	0.120696	OSTM1	2.3417	2.94205	0.329268	4.98046e-10	8.1074e-08	XPO1	3.58673	3.87803	0.112654	0.000176279	0.00235606
FAM135A	2.12361	1.8376	-0.208695	0.10961	0.204817	CDH7	0.00403987	0.00452715	0.164295	0.0459534	0.0911875	LINC01587	0.103553	0.0888082	-0.221603	0.159522	0.273417
COL19A1	0.0241675	0.0404049	0.741464	0.0170499	0.0571725	IMPG2	0.0653365	0.120862	0.887399	1.78876e-05	0.000177513	RNF13	3.9068	4.08984	0.0660555	0.0275955	0.083289
EPB41L3	1.31085	1.77447	0.436891	0.000293543	0.00399527	PCNP	4.83342	5.10287	0.0782655	0.000784978	0.00362502	DOPEY1	1.55405	1.67954	0.112037	0.221955	0.340854
COBLL1	1.57552	1.77814	0.174542	0.00784757	0.0336019	EXD2	2.32289	2.52194	0.118617	0.0159661	0.0397556	LYRM2	1.9603	2.07316	0.0807565	0.132472	0.240847
DLG3	3.69612	3.50351	-0.077211	0.049898	0.119023	ARG2	1.01059	1.36633	0.435111	0.00243882	0.00890206	KAT6A	2.39659	2.63545	0.137068	0.0104937	0.0426402
KCNK2	0.430005	0.589276	0.454591	0.0122042	0.0453639	MEF2C	1.31021	2.06107	0.653599	2.45222e-09	2.26633e-07	ZCCHC6	2.6679	2.77908	0.0589024	0.178747	0.294482
SERTAD4	1.35767	1.26689	-0.0998388	0.371212	0.476167	PTPRC	1.86606	3.01747	0.693345	4.56862e-06	5.99044e-05	ULK2	1.38392	1.62199	0.229003	0.000524911	0.00526758
TRAF5	2.35068	1.91478	-0.295905	0.000275861	0.00385985	CACNA1S	0.0109851	0.0143226	0.382744	0.156312	0.237119	GRHL2	2.66051	2.196	-0.276821	0.00692021	0.0319536
MRPL22	2.38121	2.11556	-0.170658	0.000235927	0.00350456	PKP1	2.02055	1.31945	-0.614809	0.00822678	0.0235133	TNPO1	3.17611	3.37947	0.0895327	0.0504136	0.125534
GEMIN5	2.2208	2.1654	-0.0364422	0.667881	0.726876	STK17B	2.83056	3.32988	0.234379	4.21e-05	0.000352371	PLOD1	4.81453	5.20851	0.113475	0.00125654	0.00982067
OPRK1	0.0804523	0.0300916	-1.41877	0.233838	0.346047	CDC14B	1.87125	1.74769	-0.0985525	0.143921	0.222331	P2RX5	0.50166	0.954848	0.928562	0.153636	0.265992
NFE2L1	5.57592	5.55193	-0.00621921	0.769735	0.809948	ZNF510	1.32438	1.55768	0.234078	0.00471874	0.0151019	ITGAE	1.55291	1.74562	0.168763	0.00871486	0.0374436
SEMA5B	0.407316	0.459999	0.175483	0.277178	0.388508	LRP2	0.0409116	0.0329772	-0.311043	0.830821	0.857039	DIS3	2.20315	2.3482	0.0919878	0.0263338	0.0806778
GSK3B	3.03957	2.96313	-0.0367455	0.438984	0.535742	ZNF506	1.37411	1.52325	0.148653	0.140904	0.218707	PIBF1	2.33837	2.43352	0.0575422	0.193956	0.311608
ITGB5	5.61988	5.38931	-0.0604391	0.147737	0.250767	JMJD4	2.21715	2.06457	-0.102868	0.0147925	0.0374584	AC000111.6	0.729299	0.375017	-0.959554	0.000138241	0.00198181
ERC1	2.01152	2.19839	0.128167	0.166538	0.272968	DUSP12	3.25815	3.09303	-0.0750302	0.0512499	0.0993678	NUFIP1	1.65833	1.71517	0.0486253	0.417695	0.522759
XPO1	3.81776	3.58673	-0.0900553	0.00519166	0.0255885	AACS	2.00948	1.8585	-0.112681	0.0290867	0.0637009	PDS5B	1.86664	2.08055	0.156522	0.00531313	0.0265037
LINC01587	0.0754069	0.103553	0.4576	0.0438368	0.108692	KIAA0141	3.42921	3.31349	-0.0495235	0.0348401	0.0734974	OXCT1	2.60803	2.97842	0.19159	0.000552309	0.0054664
TRPM3	0.0383601	0.0819053	1.09435	7.07339e-05	0.00162351	SLC13A1	0.0272624	0.0116942	-1.22112	0.316934	0.407127	RRAGB	2.43951	2.70778	0.150519	0.000490348	0.00502758
PALB2	2.17273	2.0127	-0.11038	0.0692966	0.149399	CADPS2	2.85187	2.64745	-0.107306	0.232032	0.321503	EPYC	0.830494	1.86858	1.1699	0.000295315	0.0034799
DOPEY1	1.43977	1.55405	0.110192	0.200842	0.311394	PCDHB4	0.932601	1.32021	0.50143	7.58987e-05	0.000560293	CYLD	2.24918	2.58851	0.202727	0.000189569	0.00249833
LYRM2	1.854	1.9603	0.080436	0.145506	0.248261	PCDHA6	0.0527155	0.129473	1.29636	1.58663e-06	2.64944e-05	SLC27A5	0.716904	0.678656	-0.0790994	0.236088	0.35517
KAT6A	2.32922	2.39659	0.0411369	0.482847	0.572964	PCDHGA2	0.317883	0.51928	0.708016	1.74462e-05	0.000173916	ZNF324	1.31016	1.38372	0.0788141	0.21512	0.333764
ZCCHC6	2.72347	2.6679	-0.0297413	0.673727	0.731758	HSPB11	2.60871	2.56346	-0.0252478	0.41652	0.49928	ZNF671	1.40083	1.66993	0.253505	0.00577987	0.0281801
ULK2	1.15654	1.38392	0.258948	0.00155721	0.0115657	ATP8B1	3.80047	3.30139	-0.203106	0.00252993	0.00916224	ZNF416	1.44089	1.58703	0.139373	0.013083	0.0497143
GRHL2	2.90593	2.66051	-0.127295	0.0489695	0.11753	IL12RB2	0.0862813	0.168863	0.968733	7.33067e-06	8.78025e-05	ZNF586	1.54635	1.76358	0.189642	0.0146706	0.0538492
TNPO1	3.14726	3.17611	0.0131684	0.638957	0.702453	SMARCD3	2.31747	2.72058	0.231358	0.000249218	0.00144273	ZNF264	1.74958	2.03084	0.215072	3.85417e-05	0.000773829
PLOD1	4.85891	4.81453	-0.0132369	0.656249	0.717092	WDR70	2.18706	2.15118	-0.0238659	0.543668	0.611979	RPS5	7.14777	6.99683	-0.0307923	0.0443015	0.114923
P2RX5	0.421026	0.50166	0.2528	0.0783497	0.162468	FYB	1.67652	2.42128	0.5303	6.75586e-05	0.000510162	FAT1	3.86563	3.90219	0.0135821	0.682806	0.739805
ITGAE	1.52531	1.55291	0.02587	0.571805	0.647234	MPP4	0.0395262	0.056448	0.514113	0.0164578	0.0406623	YTHDC1	3.48744	3.61027	0.0499398	0.245239	0.364432
DIS3	2.35525	2.20315	-0.0963179	0.102674	0.195435	BZW1	3.91575	3.91281	-0.00108338	0.997788	0.998171	CHMP2B	4.27335	4.41291	0.0463602	0.232497	0.351643
PIBF1	2.50696	2.33837	-0.100437	0.0294528	0.0825779	PGR	0.28915	0.62453	1.11095	6.26109e-07	1.27764e-05	SMAP2	4.17472	4.61217	0.143767	0.0320622	0.0918756
AC000111.6	0.383934	0.729299	0.925652	0.00674759	0.0304939	C1QTNF3	2.2811	3.11432	0.449186	0.000223557	0.00132087	ZMPSTE24	4.26776	4.29377	0.00876481	0.433609	0.536448
PDS5B	1.85408	1.86664	0.00974283	0.523752	0.607829	ME2	1.75105	2.09751	0.260458	4.63201e-05	0.00037938	STARD7	4.74535	4.70589	-0.0120481	0.284315	0.403057
OXCT1	2.5466	2.60803	0.0343885	0.745331	0.790548	C5orf22	2.60433	2.56983	-0.0192364	0.270958	0.362044	NOA1	3.23831	3.21025	-0.0125518	0.325152	0.440997
EPYC	1.19665	0.830494	-0.526963	0.153159	0.257547	CCNT2	2.4524	2.47938	0.0157834	0.966822	0.972627	REST	2.52158	2.56876	0.0267426	0.230716	0.349835
CYLD	2.20133	2.24918	0.0310248	0.45819	0.551977	FAM135A	2.12361	1.74035	-0.287139	0.0164579	0.0406623	HAL	0.23231	0.297864	0.358602	0.0302758	0.0884314
SLC27A5	0.707286	0.716904	0.0194848	0.685478	0.741783	COL19A1	0.0241675	0.121599	2.33099	0.000157881	0.00100652	SSH1	2.21834	2.58973	0.223318	2.06641e-05	0.000493811
ZNF324	1.23936	1.31016	0.0801443	0.0215807	0.0671089	EPB41L3	1.31085	2.26987	0.792112	2.03911e-10	4.67364e-08	GSTP1	8.01611	7.69164	-0.0596105	0.0472746	0.120154
ZNF671	1.11907	1.40083	0.323989	0.00296513	0.0176153	COBLL1	1.57552	1.71401	0.121554	0.0575029	0.108844	KIAA1467	0.946582	1.1279	0.252841	0.0275955	0.083289
ZNF416	1.40578	1.44089	0.0355864	0.424889	0.522693	DLG3	3.69612	3.13312	-0.23841	1.72279e-07	4.80602e-06	SLCO1A2	0.0311053	0.0687155	1.14347	0.233295	0.352789
ZNF586	1.67956	1.54635	-0.11922	0.189778	0.299641	KCNK2	0.430005	0.873714	1.02281	4.52277e-05	0.000372039	WBP11	3.77725	3.98379	0.0768085	0.0129163	0.0492792
ZNF264	1.76692	1.74958	-0.0142321	0.763611	0.805232	SERTAD4	1.35767	1.26904	-0.0973954	0.539995	0.608801	EIF3I	6.48969	6.52683	0.0082339	0.551286	0.633338
FAT1	4.1277	3.86563	-0.0946357	0.145506	0.248261	TRAF5	2.35068	2.18004	-0.108727	0.268551	0.359331	NKAIN1	0.159511	0.36596	1.19803	6.65736e-05	0.00115538
YTHDC1	3.52305	3.48744	-0.0146558	0.6447	0.707404	MRPL22	2.38121	2.16844	-0.135038	4.85777e-05	0.000394264	COL16A1	4.02396	4.44941	0.145	0.000924745	0.00792895
CHMP2B	4.51887	4.27335	-0.0805936	0.016309	0.0553118	GEMIN5	2.2208	2.39545	0.109217	0.00721002	0.0211278	TXLNA	4.10075	4.35596	0.0871017	0.000207507	0.00266672
SMAP2	3.68506	4.17472	0.17999	0.000703121	0.00691398	NFE2L1	5.57592	5.9342	0.089843	1.74462e-05	0.000173916	APOB	0.504957	0.188072	-1.42488	0.223688	0.342689
PPIE	2.56337	2.56264	-0.000409181	0.751409	0.795034	SEMA5B	0.407316	0.545158	0.420526	0.0316317	0.0681442	NCOA1	2.84337	2.94262	0.0494994	0.345766	0.459377
STARD7	4.71331	4.74535	0.00977489	0.566364	0.642376	GSK3B	3.03957	3.1599	0.0560099	0.209063	0.296902	EFR3B	0.34457	0.59815	0.795709	0.00127673	0.00993878
NOA1	3.36208	3.23831	-0.054113	0.156924	0.261737	ITGB5	5.61988	5.68567	0.0167906	0.300992	0.391475	KIF3C	1.83488	2.29656	0.323793	1.93759e-06	8.46295e-05
REST	2.44936	2.52158	0.0419206	0.128574	0.228188	ERC1	2.01152	2.31129	0.200416	0.000902703	0.0040524	RAB10	5.17747	5.28871	0.0306683	0.397022	0.504891
HAL	0.436922	0.23231	-0.911327	0.00424907	0.022341	LINC01587	0.0754069	0.0888082	0.235997	0.252713	0.343026	GCKR	1.22274	1.10188	-0.150142	0.314053	0.431305
SSH1	2.04469	2.21834	0.1176	0.0589375	0.133511	RNF13	3.80521	4.08984	0.104066	0.00123581	0.00519608	HADHA	5.73421	5.73041	-0.000955837	0.969043	0.974916
GSTP1	8.49408	8.01611	-0.0835557	0.00414287	0.0219519	TRPM3	0.0383601	0.161086	2.07015	1.92494e-06	3.07239e-05	MAPRE3	2.73294	3.20195	0.228494	9.56141e-05	0.00150057
APLP2	6.75349	6.46665	-0.0626127	0.00822918	0.0346991	PALB2	2.17273	2.0238	-0.102443	0.0132774	0.0344438	CAD	2.64729	2.83466	0.0986597	0.0185896	0.0631859
KIAA1467	0.783126	0.946582	0.273483	0.00246611	0.0155943	DOPEY1	1.43977	1.67954	0.222229	0.0115319	0.0307367	CD82	4.98481	5.08992	0.0301039	0.294709	0.413151
EIF3I	6.65044	6.48969	-0.0352999	0.0249918	0.0742239	LYRM2	1.854	2.07316	0.161193	0.00128463	0.00535108	BCORL1	1.71248	1.87178	0.128326	0.0615272	0.143795
NKAIN1	0.121919	0.159511	0.387728	0.0225113	0.069111	KAT6A	2.32922	2.63545	0.178205	0.00128463	0.00535108	ATRX	2.12118	2.29863	0.115907	0.0554485	0.133919
TXLNA	4.01393	4.10075	0.0308735	0.284331	0.395323	ULK2	1.15654	1.62199	0.487951	3.00486e-09	2.59305e-07	TAF9	2.87631	2.97301	0.0477087	0.0924738	0.18909
NCOA1	2.57397	2.84337	0.143609	0.00221671	0.0145334	GRHL2	2.90593	2.196	-0.404117	7.76795e-05	0.000570207	FCN1	1.36565	1.43284	0.0692837	0.449867	0.550101
AGBL5	2.5517	2.51378	-0.0215994	0.926517	0.93983	TNPO1	3.14726	3.37947	0.102701	0.0231444	0.0531788	MYNN	1.76072	1.91295	0.119635	0.00142668	0.0107545
EFR3B	0.236689	0.34457	0.541805	0.00164524	0.0119808	PLOD1	4.85891	5.20851	0.100238	0.00733062	0.0214046	MECOM	2.87156	2.44345	-0.232913	0.0195227	0.0654164
KIF3C	1.5184	1.83488	0.273134	0.00559126	0.0268527	P2RX5	0.421026	0.954848	1.18136	0.00369282	0.0123858	SCAMP1	3.33695	3.57282	0.0985313	0.0467677	0.119275
RAB10	5.37214	5.17747	-0.0532491	0.0589375	0.133511	ITGAE	1.52531	1.74562	0.194633	0.00152713	0.00613723	HACE1	0.865718	1.02881	0.249009	0.00180415	0.0126623
GCKR	1.69099	1.22274	-0.467754	0.039679	0.101008	DIS3	2.35525	2.3482	-0.00433011	0.922684	0.935914	SEH1L	1.96613	2.09266	0.089975	0.0269583	0.0820767
HADHA	5.77807	5.73421	-0.0109935	0.371212	0.476167	PIBF1	2.50696	2.43352	-0.0428952	0.151683	0.231265	WDR47	1.94562	2.30507	0.244577	2.02718e-06	8.688e-05
MAPRE3	2.86138	2.73294	-0.0662584	0.120703	0.218704	TDRD3	2.02613	2.08335	0.0401784	0.223481	0.312573	WDFY1	3.43463	3.74018	0.122953	0.000971069	0.00820034
CD59	6.93856	6.81991	-0.0248826	0.221323	0.332687	AC000111.6	0.383934	0.375017	-0.0339012	0.23094	0.320563	OVGP1	0.959836	1.18603	0.305277	0.0202491	0.0671358
CD82	5.46484	4.98481	-0.132642	0.00493978	0.024777	PDS5B	1.85408	2.08055	0.166265	0.000533375	0.00265806	SLC25A24	3.00315	3.07087	0.0321664	0.491988	0.584208
BCORL1	1.83347	1.71248	-0.0984855	0.230544	0.342533	OXCT1	2.5466	2.97842	0.225979	0.000800875	0.0036824	MAP3K4	2.16214	2.43416	0.17096	0.000124273	0.00182095
TAF9	3.03635	2.87631	-0.0781223	0.0174131	0.0580078	RRAGB	2.4673	2.70778	0.134178	0.0035013	0.0118516	PILRA	2.3022	2.53827	0.140833	0.100715	0.200056
FCN1	0.980788	1.36565	0.477578	0.0271433	0.0782206	EPYC	1.19665	1.86858	0.642934	0.0567547	0.107714	ABCB1	2.02282	2.00181	-0.0150628	0.778867	0.818624
MYNN	1.87655	1.76072	-0.0919144	0.118796	0.216595	CYLD	2.20133	2.58851	0.233752	4.11035e-05	0.000345646	ZNF213	2.0328	1.97225	-0.0436286	0.22543	0.344261
MECOM	3.01823	2.87156	-0.0718697	0.218309	0.329698	SLC27A5	0.707286	0.678656	-0.0596146	0.619642	0.676966	AKR1B1	4.05703	4.34292	0.0982424	0.0272753	0.082653
SCAMP1	3.43611	3.33695	-0.0422437	0.310343	0.420468	ZNF324	1.23936	1.38372	0.158958	0.00331885	0.0113467	CPNE3	3.74073	3.88255	0.053685	0.268207	0.387278
PREP	3.89926	3.65273	-0.0942249	0.174035	0.281492	ZNF671	1.11907	1.66993	0.577494	7.22354e-07	1.43122e-05	RRN3	3.38646	3.5206	0.0560427	0.0738561	0.162212
HACE1	0.711082	0.865718	0.283882	0.00178589	0.0126236	ZNF416	1.40578	1.58703	0.174959	0.00235073	0.00863883	CTTN	5.46001	5.54861	0.023223	0.391951	0.500395
SEH1L	2.16225	1.96613	-0.137177	0.00374173	0.0206197	ZNF586	1.67956	1.76358	0.0704216	0.361611	0.4489	WNT11	2.56762	2.39527	-0.100241	0.68952	0.745105
WDR47	1.84457	1.94562	0.0769442	0.26668	0.378481	ZNF264	1.76692	2.03084	0.20084	0.000641348	0.00307783	MTIF2	3.24628	3.20154	-0.020022	0.369625	0.480858
WDFY1	3.6111	3.43463	-0.0722839	0.0633709	0.140269	RPS5	7.16627	6.99683	-0.0345218	0.133572	0.209989	DDHD2	2.09315	2.40406	0.199793	2.10901e-05	0.000501367
OVGP1	1.33239	0.959836	-0.473152	0.000682837	0.00680307	FAT1	4.1277	3.90219	-0.0810536	0.213112	0.301262	EPS15	3.28973	3.58601	0.124408	0.00133912	0.0102899
SLC25A24	3.09528	3.00315	-0.0435925	0.41564	0.514804	YTHDC1	3.52305	3.61027	0.035284	0.607955	0.666459	ORC1	0.915206	0.9889	0.111728	0.436294	0.538846
MAP3K4	2.01491	2.16214	0.101749	0.0244775	0.0731396	CHMP2B	4.51887	4.41291	-0.0342333	0.247551	0.337553	MGST2	4.19829	3.94489	-0.0898171	0.0102213	0.0419356
PILRA	1.85784	2.3022	0.309385	0.0189869	0.0614707	SMAP2	3.68506	4.61217	0.323757	6.82258e-07	1.36786e-05	CHERP	2.79637	2.89255	0.0487847	0.350457	0.463698
IGSF9	2.84922	1.98635	-0.520448	2.98906e-05	0.000936796	ZMPSTE24	4.18235	4.29377	0.0379284	0.158118	0.238999	ATG16L1	2.86322	2.92742	0.0319891	0.68952	0.745105
ABCB1	1.36156	2.02282	0.571112	0.000128431	0.0023825	NOA1	3.36208	3.21025	-0.0666648	0.0130725	0.0340233	POMGNT1	3.37618	3.58246	0.0855605	0.00619672	0.0295857
ZNF213	2.11445	2.0328	-0.0568114	0.192501	0.302627	REST	2.44936	2.56876	0.0686632	0.00850023	0.024112	RAD54L	0.909826	0.971495	0.0946154	0.500659	0.591351
AKR1B1	3.73319	4.05703	0.120015	0.0122042	0.0453639	HAL	0.436922	0.297864	-0.552725	0.201134	0.288124	MAST2	3.15958	3.48893	0.143054	0.00103618	0.00854467
CPNE3	3.66011	3.74073	0.031435	0.35848	0.464525	SSH1	2.04469	2.58973	0.340918	1.15321e-09	1.39998e-07	DNAJA1	5.58382	5.85288	0.0678963	0.0483021	0.121962
RRN3	3.52116	3.38646	-0.0562741	0.0944996	0.184692	GSTP1	8.49408	7.69164	-0.143166	1.35408e-07	4.00769e-06	B4GALT1	5.30303	5.45967	0.0419983	0.121122	0.226635
CTTN	5.87822	5.46001	-0.106477	0.000137064	0.00247689	APLP2	6.75349	6.51711	-0.0513991	0.00569878	0.0175756	CHMP5	4.82097	4.99186	0.050254	0.223688	0.342689
WNT11	1.79168	2.56762	0.51912	0.0142839	0.0507396	KIAA1467	0.783126	1.1279	0.526325	9.32646e-07	1.73847e-05	NFX1	2.72202	2.85608	0.0693619	0.118946	0.223895
MTIF2	3.45599	3.24628	-0.0903146	0.00155721	0.0115657	SLCO1A2	0.0518164	0.0687155	0.407226	0.00201109	0.00764568	DIMT1	2.8689	3.01768	0.0729381	0.0306261	0.0889517
DDHD2	1.97111	2.09315	0.086668	0.128574	0.228188	WBP11	3.80634	3.98379	0.0657382	0.0045579	0.0146624	IPO11	1.75611	1.85404	0.0782858	0.108522	0.210629
TTC39A	2.58521	2.10288	-0.297913	0.000523261	0.00576252	EIF3I	6.65044	6.52683	-0.027066	0.032074	0.0688587	NME8	0.228853	0.262741	0.199219	0.171484	0.286644
EPS15	3.24027	3.28973	0.0218555	0.287954	0.398951	NKAIN1	0.121919	0.36596	1.58576	4.55924e-07	1.00789e-05	EPDR1	3.40554	3.64446	0.0978227	0.090718	0.186657
ORC1	1.0119	0.915206	-0.144901	0.38422	0.48784	COL16A1	4.05829	4.44941	0.132742	0.000315709	0.00174044	SNX10	2.57543	2.79157	0.116266	0.0681476	0.153528
MGST2	4.74449	4.19829	-0.176451	1.35683e-05	0.000565298	TXLNA	4.01393	4.35596	0.117975	2.4686e-05	0.000229852	HBQ1	0.0421158	0.0848391	1.01037	0.179827	0.296083
CHERP	2.95586	2.79637	-0.0800209	0.038914	0.0996593	APOB	0.245439	0.188072	-0.384081	0.647286	0.7007	ITPKC	4.24089	4.47812	0.0785289	0.0185896	0.0631859
ATG16L1	3.22467	2.86322	-0.171513	0.000789985	0.00743096	NCOA1	2.57397	2.94262	0.193108	2.23684e-05	0.000212274	CEACAM6	7.99469	7.5342	-0.0855883	0.84614	0.873606
USP40	2.54256	2.50066	-0.0239738	0.560948	0.638122	AGBL5	2.5517	2.51868	-0.018789	0.953564	0.961484	RBM22	3.73004	3.86183	0.05009	0.193956	0.311608
POMGNT1	3.50604	3.37618	-0.0544527	0.118796	0.216595	EFR3B	0.236689	0.59815	1.33751	7.39964e-09	4.62881e-07	TMED2	6.0068	6.02325	0.0039464	0.626786	0.695368
RAD54L	1.13431	0.909826	-0.31815	0.0181851	0.0597466	KIF3C	1.5184	2.29656	0.596927	6.09535e-11	2.32343e-08	ERO1LB	3.158	3.0522	-0.0491615	0.208438	0.326897
MAST2	3.43669	3.15958	-0.121288	0.0404567	0.102437	RAB10	5.37214	5.28871	-0.0225808	0.205071	0.292186	ZFAND6	3.61613	3.78065	0.064189	0.0306261	0.0889517
CHMP5	5.05117	4.82097	-0.0672927	0.122635	0.220957	GCKR	1.69099	1.10188	-0.617896	0.00277148	0.00982709	HSD17B2	2.83378	2.10057	-0.431943	0.000189569	0.00249833
NFX1	2.81799	2.72202	-0.049992	0.463064	0.556051	HADHA	5.77807	5.73041	-0.0119494	0.352922	0.440979	TXLNG	2.38462	2.53312	0.0871527	0.0864459	0.18036
AQP6	0.642889	0.270702	-1.24787	0.00403909	0.0216233	MAPRE3	2.86138	3.20195	0.162236	0.150105	0.229545	PPEF1	0.508406	0.697623	0.456467	0.0220364	0.0711662
DIMT1	2.956	2.8689	-0.0431468	0.236842	0.348802	CAD	2.68549	2.83466	0.0779926	0.0792123	0.13964	LAT2	2.04527	2.41847	0.241801	0.013422	0.0506302
IPO11	1.72338	1.75611	0.0271478	0.577271	0.651759	CD59	6.93856	6.87724	-0.0128054	0.300992	0.391475	HUWE1	3.74938	3.9722	0.083287	0.00586116	0.0284447
FOLH1	0.761615	0.879509	0.207635	0.727194	0.775785	CD82	5.46484	5.08992	-0.102538	0.00569878	0.0175756	ALG9	0.888397	0.950696	0.0977798	0.131301	0.239338
EIF2AK1	5.09329	4.79121	-0.0882081	0.000682837	0.00680307	BCORL1	1.83347	1.87178	0.0298407	0.783684	0.816397	MYBPC2	0.220497	0.291075	0.40063	0.796433	0.832676
NME8	0.161348	0.228853	0.504253	0.0396782	0.101008	ATRX	2.09561	2.29863	0.133403	0.0199918	0.0473907	NOX4	1.26297	1.71007	0.437239	0.000365814	0.00407574
EPDR1	3.47032	3.40554	-0.0271858	0.212369	0.323454	TAF9	3.03635	2.97301	-0.0304136	0.140904	0.218707	ACOX3	2.57922	2.36686	-0.12396	0.000734423	0.00672447
SNX10	2.15054	2.57543	0.260113	0.0149328	0.0521892	FCN1	0.980788	1.43284	0.546861	0.00230778	0.00851048	MTMR2	2.84318	3.14548	0.145776	1.76968e-06	7.93198e-05
MRPL28	4.59296	4.31465	-0.0901831	0.0159549	0.0545676	MYNN	1.87655	1.91295	0.0277208	0.240813	0.330902	PPP1R15A	4.83333	5.29956	0.132855	0.000986982	0.00827602
ITPKC	4.71803	4.24089	-0.153819	0.000332135	0.00432069	MECOM	3.01823	2.44345	-0.304783	0.000628418	0.00302795	HSD17B14	2.68519	3.29805	0.296588	0.000276212	0.00331188
CEACAM6	8.43018	7.99469	-0.0765215	0.0537609	0.125349	PREP	3.89926	3.65789	-0.0921903	0.0754928	0.134365	TRIP6	4.75777	4.61167	-0.0449969	0.329662	0.445086
RBM22	3.88034	3.73004	-0.0569903	0.16901	0.275951	HACE1	0.711082	1.02881	0.532891	2.27201e-10	5.00717e-08	ACHE	2.24397	2.39864	0.09616	0.352818	0.465181
TMED2	6.00824	6.0068	-0.000346266	0.371212	0.476167	SEH1L	2.16225	2.09266	-0.0472018	0.164758	0.24684	FTL	11.4696	11.6548	0.0231103	0.362362	0.474452
ERO1LB	1.82867	3.158	0.788211	1.93338e-08	6.35876e-06	WDR47	1.84457	2.30507	0.321521	7.0203e-07	1.39772e-05	SRRT	4.32186	4.43977	0.038833	0.232497	0.351643
ZFAND6	3.8288	3.61613	-0.0824453	0.0239725	0.0721239	OVGP1	1.33239	1.18603	-0.167875	0.0486593	0.0953484	NLK	2.2204	2.38771	0.104807	0.047786	0.121072
LAT2	1.78065	2.04527	0.19989	0.0345825	0.09197	SLC25A24	3.09528	3.07087	-0.0114261	0.809364	0.838302	PIGS	3.45569	3.55108	0.0392808	0.613897	0.685009
HUWE1	3.76558	3.74938	-0.00621923	0.757503	0.800058	MAP3K4	2.01491	2.43416	0.27271	3.55647e-09	2.9364e-07	ADAMTS2	3.6794	4.25329	0.209106	0.00115993	0.00929372
ALG9	0.793669	0.888397	0.162667	0.000375436	0.00467931	PILRA	1.85784	2.53827	0.450217	3.38992e-05	0.000294753	TMPRSS11E	0.254417	0.408564	0.683371	0.649527	0.713413
MYBPC2	0.157928	0.220497	0.481492	0.00862732	0.0357735	IGSF9	2.84922	1.78369	-0.675701	6.63023e-07	1.3349e-05	ATXN7L3	3.81025	3.95241	0.0528467	0.0488229	0.122881
NOX4	1.21857	1.26297	0.0516211	0.577271	0.651759	ABCB1	1.36156	2.00181	0.556049	0.000424419	0.00220843	PGS1	2.41277	2.77334	0.200935	3.69572e-07	2.4746e-05
ACOX3	2.42588	2.57922	0.088428	0.0325758	0.0883136	ZNF213	2.11445	1.97225	-0.10044	0.0152525	0.0383723	PSMC5	4.7134	4.91134	0.0593488	0.0236761	0.0749762
PPP1R15A	5.36918	4.83333	-0.151684	0.00240146	0.0153172	AKR1B1	3.73319	4.34292	0.218257	9.86811e-07	1.82166e-05	UIMC1	2.55021	2.69872	0.0816569	0.0223026	0.0718311
HSD17B14	2.3052	2.68519	0.220131	0.0124839	0.0461639	CPNE3	3.66011	3.88255	0.08512	0.0388431	0.0799407	CETP	0.695314	1.08466	0.641505	0.00365941	0.0205404
TRIP6	5.09055	4.75777	-0.0975365	0.0244775	0.0731396	RRN3	3.52116	3.5206	-0.000231383	0.671376	0.720652	MMP2	6.50357	7.19289	0.145341	2.10901e-05	0.000501367
ACHE	2.57912	2.24397	-0.200825	0.166538	0.272968	CTTN	5.87822	5.54861	-0.0832537	0.000140518	0.000919559	MT3	0.177832	0.399218	1.16666	0.271172	0.390592
FTL	11.3425	11.4696	0.016073	0.187084	0.296761	WNT11	1.79168	2.39527	0.418879	0.0124747	0.0327799	LPCAT2	2.56664	2.62776	0.0339546	0.560474	0.64107
SRRT	4.59495	4.32186	-0.0883969	0.00403909	0.0216233	MTIF2	3.45599	3.20154	-0.110337	3.3088e-05	0.000288664	GNAO1	1.0485	1.5598	0.573024	0.00577987	0.0281801
BAX	4.97094	4.54238	-0.130069	0.00469901	0.0239325	DDHD2	1.97111	2.40406	0.286462	1.46019e-06	2.47688e-05	OGFOD1	2.6786	2.88865	0.108912	0.00125654	0.00982067
NLK	2.27532	2.2204	-0.0352498	0.325891	0.434708	TTC39A	2.58521	1.99264	-0.3756	2.23684e-05	0.000212274	SH3BP2	2.36448	2.69383	0.188133	0.000611146	0.00590156
PIGS	3.5111	3.45569	-0.0229473	0.721181	0.7709	EPS15	3.24027	3.58601	0.146264	1.16505e-05	0.000126578	NOP14	3.68044	3.72619	0.017823	0.500659	0.591351
ADAMTS2	3.30224	3.6794	0.156029	0.0517993	0.122203	MGST2	4.74449	3.94489	-0.266268	6.48403e-12	6.8974e-09	ADD1	4.173	4.42529	0.0846869	0.000136343	0.00195799
ATXN7L3	3.93041	3.81025	-0.044794	0.156924	0.261737	CHERP	2.95586	2.89255	-0.0312362	0.151683	0.231265	L2HGDH	0.921752	0.983073	0.0929188	0.311863	0.429439
PGS1	2.55261	2.41277	-0.0812801	0.20368	0.314226	ATG16L1	3.22467	2.92742	-0.139524	0.000128436	0.000853953	TXNDC16	1.65468	1.65299	-0.00147241	0.420323	0.525016
PSMC5	4.96361	4.7134	-0.0746219	0.0136599	0.0491097	USP40	2.54256	2.52653	-0.00912338	0.708146	0.75156	C14orf166	3.62681	3.73825	0.0436607	0.0791665	0.169817
UIMC1	2.71115	2.55021	-0.0882902	0.0156076	0.0537611	POMGNT1	3.50604	3.58246	0.0311078	0.554763	0.621319	NID2	1.88315	2.53021	0.426108	1.10995e-05	0.000309542
CETP	0.61847	0.695314	0.16896	0.337879	0.445912	RAD54L	1.13431	0.971495	-0.223535	0.0499405	0.0973794	GMCL1	2.77857	2.7317	-0.0245455	0.40728	0.513218
MMP2	6.1663	6.50357	0.0768264	0.111401	0.207028	MAST2	3.43669	3.48893	0.0217661	0.536333	0.605817	SF3B2	4.48192	4.64471	0.0514716	0.0531613	0.13028
MT3	0.148196	0.177832	0.263011	0.048052	0.115924	DNAJA1	5.5988	5.85288	0.0640314	0.00836251	0.0238086	KLHL42	2.25116	2.57201	0.192226	0.00245043	0.0155774
LPCAT2	2.80528	2.56664	-0.128262	0.161677	0.26732	B4GALT1	5.34696	5.45967	0.0300964	0.0736872	0.131971	GNAS	6.33501	6.71126	0.0832371	0.0132515	0.0501391
GNAO1	0.736838	1.0485	0.508914	0.000539099	0.00586194	CHMP5	5.05117	4.99186	-0.0170387	0.432604	0.513745	DNM1L	3.09248	3.40113	0.137251	8.25407e-06	0.000249499
OGFOD1	2.84784	2.6786	-0.0883854	0.0611209	0.13686	AQP6	0.642889	0.260342	-1.30416	0.0048847	0.0155238	PTHLH	1.18874	1.60422	0.432435	0.000516064	0.00521125
SH3BP2	2.80931	2.36448	-0.248691	0.0002674	0.00378694	DIMT1	2.956	3.01768	0.0297912	0.403911	0.488375	ERGIC2	2.82719	2.966	0.0691525	0.0443015	0.114923
NOP14	3.82702	3.68044	-0.0563445	0.0913796	0.180589	IPO11	1.72338	1.85404	0.105434	0.0393699	0.0807459	TFAP2C	1.00163	0.94483	-0.0842242	0.630026	0.697804
ADD1	4.08687	4.173	0.0300909	0.149994	0.253276	FOLH1	0.761615	0.836033	0.134496	0.0023944	0.00876449	CASS4	0.609124	0.756915	0.313396	0.0695396	0.155602
L2HGDH	0.94027	0.921752	-0.0286956	0.856803	0.880973	EIF2AK1	5.09329	4.84219	-0.0729385	0.000100061	0.000696997	PIR	1.8588	1.91907	0.0460358	0.331933	0.446918
TXNDC16	1.48723	1.65468	0.153923	0.0229895	0.0701708	NME8	0.161348	0.262741	0.703471	0.0010366	0.00453282	AAMDC	3.15171	2.99817	-0.0720492	0.0190511	0.0642847
C14orf166	3.85248	3.62681	-0.0870855	0.00124675	0.00998113	SNX10	2.15054	2.79157	0.376379	6.63023e-07	1.3349e-05	RFX2	1.14639	1.52961	0.416072	0.000115351	0.00172717
NID2	1.60884	1.88315	0.227132	0.0557841	0.128386	SEPHS1	3.59116	3.63461	0.0173492	0.962402	0.968929	METTL2A	2.02845	2.098	0.0486344	0.1168	0.221467
GMCL1	2.74777	2.77857	0.016083	0.703248	0.756532	MRPL28	4.59296	4.3202	-0.0883293	0.00463769	0.0148907	CNOT3	2.89312	3.02794	0.0657127	0.172918	0.288331
SF3B2	4.60204	4.48192	-0.0381568	0.132656	0.233051	HBQ1	0.0566919	0.0848391	0.581589	0.692408	0.738468	GP6	0.227829	0.257785	0.178216	0.491988	0.584208
KLHL42	2.07347	2.25116	0.118623	0.0366939	0.0956916	ITPKC	4.71803	4.47812	-0.0752902	0.0870981	0.15037	PTPN4	1.21546	1.32498	0.124464	0.157624	0.271029
GNAS	6.27957	6.33501	0.0126824	0.472899	0.564418	CEACAM6	8.43018	7.5342	-0.16211	0.0132774	0.0344438	DDX18	3.14721	3.33516	0.0836837	0.00248773	0.0157523
DNM1L	3.31514	3.09248	-0.100304	0.0174131	0.0580078	RBM22	3.88034	3.86183	-0.00690031	0.551053	0.618227	GNA11	4.02318	3.96277	-0.0218273	0.404701	0.511191
PTHLH	1.38498	1.18874	-0.220427	0.0783497	0.162468	ERO1LB	1.82867	3.0522	0.73905	2.8595e-05	0.000258275	ASAP3	2.62262	2.53761	-0.0475363	0.626786	0.695368
PHACTR3	1.47572	1.31198	-0.169665	0.399743	0.50202	ZFAND6	3.8288	3.78065	-0.0182563	0.529049	0.600002	DNMT3B	0.992686	0.936503	-0.0840541	0.127837	0.234994
TFAP2C	0.873822	1.00163	0.19694	0.120703	0.218704	HSD17B2	2.98391	2.10057	-0.50642	0.000214005	0.00127761	REM1	0.925155	1.09798	0.247083	0.0392601	0.105971
AURKA	2.36446	2.105	-0.167689	0.0853881	0.172305	TXLNG	2.44569	2.53312	0.0506736	0.266159	0.357081	TPX2	2.89354	3.01348	0.0585966	0.47489	0.57066
CASS4	0.350443	0.609124	0.797557	0.000189055	0.00305151	PPEF1	0.52391	0.697623	0.413129	0.0316317	0.0681442	EPB41L1	3.99918	3.92478	-0.0270928	0.500659	0.591351
PIR	1.92227	1.8588	-0.0484402	0.397504	0.499511	LAT2	1.78065	2.41847	0.441691	2.07677e-05	0.00019973	SLC15A1	2.23797	1.955	-0.195023	0.15897	0.272608
METTL2A	2.16968	2.02845	-0.097103	0.0234765	0.0710908	HUWE1	3.76558	3.9722	0.0770678	0.0117152	0.0311442	DOCK9	2.4406	2.71898	0.15583	0.00172201	0.0122459
SULT2B1	2.35431	1.74126	-0.435176	0.00435774	0.0227582	ZW10	2.76449	2.77441	0.00516617	0.870043	0.890304	ANKRD10	4.71802	4.90499	0.0560694	0.172918	0.288331
CNOT3	2.98837	2.89312	-0.0467321	0.236842	0.348802	ALG9	0.793669	0.950696	0.260447	1.30631e-06	2.26548e-05	TGDS	2.42492	2.54821	0.0715448	0.10456	0.205371
GP6	0.299873	0.227829	-0.396399	0.0260483	0.0761962	MYBPC2	0.157928	0.291075	0.882122	0.0063075	0.0190562	DOCK3	0.256705	0.519132	1.01599	5.48661e-05	0.00100911
PTPN4	1.21525	1.21546	0.000256252	0.844231	0.871026	NOX4	1.21857	1.71007	0.48886	0.000209374	0.00125703	C3orf18	1.48656	1.79194	0.269546	0.000413003	0.00447764
DDX18	3.33005	3.14721	-0.0814716	0.0517993	0.122203	ACOX3	2.42588	2.36686	-0.0355318	0.532685	0.602884	COQ9	3.47824	3.37648	-0.0428383	0.0236761	0.0749762
KHSRP	4.97618	4.77716	-0.0588836	0.0106401	0.0413002	MTMR2	2.93196	3.14548	0.101415	0.00663329	0.0198251	TMEM40	0.364077	0.487254	0.42043	0.0839539	0.176793
GNA11	4.09577	4.02318	-0.025801	0.555557	0.633795	PPP1R15A	5.36918	5.29956	-0.0188297	0.745609	0.783887	KIF9	1.15093	1.12518	-0.0326398	0.1168	0.221467
ASAP3	2.26403	2.62262	0.212115	0.00135578	0.0105021	HSD17B14	2.3052	3.29805	0.516719	1.62788e-09	1.72099e-07	ARHGAP28	0.435601	0.56081	0.364505	0.047786	0.121072
EDEM2	4.46671	4.42412	-0.0138222	0.443742	0.539711	TRIP6	5.09055	4.61167	-0.142533	0.000415621	0.00217212	CRLS1	3.22183	3.11656	-0.0479248	0.0654323	0.149365
DNMT3B	0.902529	0.992686	0.137364	0.136838	0.237915	ACHE	2.57912	2.39864	-0.104665	0.655276	0.707426	PPP1R13B	2.37093	2.18967	-0.114738	0.020999	0.0688057
REM1	0.709404	0.925155	0.383087	0.0122042	0.0453639	FTL	11.3425	11.6548	0.0391833	0.0188398	0.0452971	ATRN	3.1422	3.20749	0.0296701	0.49776	0.588968
TPX2	3.4245	2.89354	-0.243056	0.0050643	0.0251694	SRRT	4.59495	4.43977	-0.0495639	0.0188398	0.0452971	SMOX	3.51779	3.45192	-0.0272701	0.750999	0.795962
FER1L4	2.86362	1.69534	-0.756267	6.95407e-06	0.000350917	BAX	4.97094	4.66021	-0.0931247	0.00496965	0.0157326	SIGLEC1	1.59826	1.81771	0.185621	0.11157	0.214569
PDRG1	3.5851	3.41585	-0.0697703	0.0445418	0.109788	NLK	2.27532	2.38771	0.0695575	0.403911	0.488375	FKBP1A	6.19727	6.42169	0.0513207	0.0233957	0.0743979
EPB41L1	4.32988	3.99918	-0.114623	0.00545508	0.0264476	ADAMTS2	3.30224	4.25329	0.365135	1.12892e-07	3.51941e-06	NSFL1C	3.52529	3.66663	0.0567126	0.117869	0.222695
ANKRD10	5.30298	4.71802	-0.168622	0.000155994	0.00268697	TMPRSS11E	0.396914	0.408564	0.0417357	0.830821	0.857039	C20orf194	1.94182	2.16245	0.155261	0.0168398	0.0590644
TGDS	2.70291	2.42492	-0.156577	0.000214641	0.00329517	PGS1	2.55261	2.77334	0.119655	0.00206484	0.00778894	ZNF343	1.64471	1.81374	0.141132	0.000378755	0.00418249
C3orf18	1.26625	1.48656	0.231416	0.00266973	0.0164394	PSMC5	4.96361	4.91134	-0.0152731	0.266159	0.357081	EBF4	2.22818	2.39387	0.103477	0.367194	0.478628
COQ9	3.7177	3.47824	-0.0960544	0.00121224	0.00980032	UIMC1	2.71115	2.69872	-0.00663338	0.459071	0.538327	CPXM1	3.6755	4.48699	0.287807	2.48124e-05	0.000567679
TMEM40	0.46182	0.364077	-0.343088	0.0662781	0.144903	CETP	0.61847	1.08466	0.810464	0.0003025	0.00168252	MAVS	3.00026	3.15223	0.0712862	0.0351082	0.0978499
KIF9	1.25048	1.15093	-0.119684	0.518543	0.603765	MMP2	6.1663	7.19289	0.222167	1.34325e-06	2.31972e-05	LZTS3	2.7803	2.68315	-0.0513118	0.167233	0.281785
ARHGAP28	0.250303	0.435601	0.799331	3.20683e-05	0.000990609	MT3	0.148196	0.399218	1.42967	0.0130695	0.0340233	F11	1.6794	0.645378	-1.37973	4.37643e-11	2.39759e-08
CRLS1	3.50325	3.22183	-0.120813	0.00679602	0.0305008	LPCAT2	2.80528	2.62776	-0.0943071	0.275815	0.36684	XRN2	4.59069	4.78203	0.0589127	0.020999	0.0688057
PPP1R13B	2.44494	2.37093	-0.0443471	0.472899	0.564418	GNAO1	0.736838	1.5598	1.08194	6.26109e-07	1.27764e-05	KIZ	1.92326	2.06538	0.102855	0.138448	0.248088
ATRN	2.90146	3.1422	0.114994	0.0306697	0.0848577	OGFOD1	2.84784	2.88865	0.0205265	0.298407	0.388837	DYNLL1	5.66519	5.82396	0.0398744	0.124444	0.230817
SMOX	4.01953	3.51779	-0.192359	0.000861559	0.00788662	SH3BP2	2.80931	2.69383	-0.0605582	0.217217	0.305632	TESC	5.74964	4.91693	-0.225715	1.75389e-05	0.000436656
SIGLEC1	1.18647	1.59826	0.429831	0.00766277	0.0330893	NOP14	3.82702	3.72619	-0.0385215	0.219291	0.307915	SNX5	3.28527	3.46849	0.078297	0.0266445	0.0814018
FKBP1A	6.34334	6.19727	-0.03361	0.195253	0.305434	ADD1	4.08687	4.42529	0.114778	3.40595e-06	4.77166e-05	RPL6	6.86788	6.86738	-0.000105296	0.646334	0.710921
NSFL1C	3.74879	3.52529	-0.0886832	0.0193993	0.0623436	L2HGDH	0.94027	0.983073	0.0642232	0.565968	0.631056	SIRPG	0.930045	1.11902	0.266859	0.480553	0.575068
SLC4A11	2.77951	2.08794	-0.41275	0.0028886	0.0173254	TXNDC16	1.48723	1.65299	0.15245	0.040987	0.0834004	P2RX7	1.14046	1.15106	0.0133579	0.68616	0.742324
C20orf194	1.77762	1.94182	0.12746	0.0944996	0.184692	C14orf166	3.85248	3.73825	-0.0434248	0.0202892	0.0479055	ESF1	2.466	2.77519	0.170412	0.000252733	0.00309127
ZNF343	1.78595	1.64471	-0.118852	0.0611209	0.13686	NID2	1.60884	2.53021	0.653241	9.3139e-09	5.61776e-07	RBBP9	2.54678	2.72594	0.0980796	0.0328016	0.0931466
EBF4	2.18153	2.22818	0.0305265	0.593815	0.665438	KLHL42	2.07347	2.57201	0.310849	6.95875e-06	8.40153e-05	ANAPC5	3.15622	3.29902	0.0638401	0.0343244	0.0963123
CPXM1	3.28414	3.6755	0.162425	0.1433	0.245683	GNAS	6.27957	6.71126	0.0959196	0.00425102	0.0138652	SLC23A2	2.36091	2.76402	0.22742	0.000482045	0.00497411
MAVS	2.97692	3.00026	0.0112686	0.788189	0.824248	DNM1L	3.31514	3.40113	0.0369467	0.256738	0.34732	TMEM230	4.78528	4.99207	0.0610349	0.0044166	0.0233635
LZTS3	3.00418	2.7803	-0.11173	0.122635	0.220957	PTHLH	1.38498	1.60422	0.212008	0.175108	0.259135	DZANK1	0.588679	0.711134	0.272642	0.0634549	0.146673
F11	0.641772	1.6794	1.38782	1.8447e-08	6.13932e-06	ERGIC2	2.87078	2.966	0.0470786	0.153272	0.233242	KDM2B	1.48012	1.63773	0.14598	0.0185896	0.0631859
XRN2	4.6838	4.59069	-0.0289689	0.333852	0.442016	TFAP2C	0.873822	0.94483	0.112715	0.151683	0.231265	CFAP61	0.0677282	0.19616	1.5342	0.000866162	0.007564
KIZ	1.85698	1.92326	0.050596	0.346026	0.453241	AURKA	2.36446	2.1137	-0.161744	0.0399028	0.0816233	LHX5	0.0592697	0.197162	1.73401	0.0302955	0.0884702
DYNLL1	5.90677	5.66519	-0.0602447	0.0202476	0.0642791	CASS4	0.350443	0.756915	1.11095	2.78867e-08	1.2582e-06	TASP1	2.15223	2.42514	0.172236	1.58202e-05	0.000403777
TESC	6.19269	5.74964	-0.107094	0.0111405	0.0426108	PIR	1.92227	1.91907	-0.00240441	0.957982	0.965327	OAS1	3.77531	3.70028	-0.0289577	0.509411	0.598631
SNX5	3.46605	3.28527	-0.0772794	0.0453992	0.111234	AAMDC	3.2029	2.99817	-0.0952942	0.0443903	0.088694	GCN1L1	3.65309	3.81566	0.0628173	0.0295856	0.0871122
RPL6	6.77104	6.86788	0.0204882	0.200842	0.311394	RFX2	1.11758	1.52961	0.452788	8.92225e-05	0.000636194	RPLP0	8.34016	8.14173	-0.0347405	0.00825874	0.0360264
SIRPG	0.625116	0.930045	0.573177	0.00883277	0.0363826	METTL2A	2.16968	2.098	-0.0484686	0.113341	0.184575	PXN	4.32002	4.49055	0.0558529	0.156286	0.269215
MAPKAPK5	1.72389	1.60162	-0.10613	0.277178	0.388508	SULT2B1	2.35431	1.82145	-0.37022	0.00523256	0.016409	SIRT4	1.00125	0.884569	-0.178753	0.0367217	0.10098
P2RX7	0.707091	1.14046	0.689642	9.87651e-05	0.00200806	GP6	0.299873	0.257785	-0.218183	0.0474058	0.0933583	KIF16B	2.19852	2.29575	0.0624329	0.213435	0.332091
ESF1	2.60187	2.466	-0.077375	0.227441	0.339365	PTPN4	1.21525	1.32498	0.12472	0.101253	0.168971	TRMT6	2.35572	2.53345	0.104931	0.00335148	0.0193636
RBBP9	2.51009	2.54678	0.0209375	0.513361	0.598954	DDX18	3.33005	3.33516	0.00221213	0.883159	0.901279	PEBP1	7.14435	7.07453	-0.0141684	0.0847832	0.177949
ANAPC5	3.18767	3.15622	-0.0143043	0.691383	0.746785	KHSRP	4.97618	4.85524	-0.035494	0.0111728	0.0299637	TBX5	0.0289692	0.051191	0.821369	0.0148691	0.0543302
SLC23A2	2.34134	2.36091	0.0120078	0.508207	0.594478	GNA11	4.09577	3.96277	-0.0476283	0.11461	0.186186	BRAP	2.50512	2.61687	0.0629601	0.154956	0.267737
SLC8B1	3.01554	3.04076	0.0120125	0.443742	0.539711	ASAP3	2.26403	2.53761	0.164579	0.00471874	0.0151019	ERP29	5.76972	5.7254	-0.0111236	0.154956	0.267737
DZANK1	0.617417	0.588679	-0.0687663	0.463064	0.556051	EDEM2	4.46671	4.43945	-0.00883179	0.547354	0.614969	NOS1	0.14671	0.139942	-0.0681336	0.189296	0.306515
KDM2B	1.38222	1.48012	0.0987255	0.0743583	0.156852	DNMT3B	0.902529	0.936503	0.05331	0.817972	0.845768	FUS	4.44487	4.62452	0.0571605	0.0347144	0.0971082
CFAP61	0.0600833	0.0677282	0.172791	0.341937	0.449612	REM1	0.709404	1.09798	0.630169	7.72155e-06	9.16035e-05	IGBP1	5.29598	5.24894	-0.0128715	0.200298	0.318713
LHX5	0.123515	0.0592697	-1.05932	0.133292	0.23405	TPX2	3.4245	3.01348	-0.184459	0.0172207	0.0420931	FXYD5	5.62587	5.97304	0.0863899	0.0316978	0.091108
TASP1	2.27774	2.15223	-0.0817732	0.10961	0.204817	FER1L4	2.86362	1.8341	-0.642766	6.00909e-05	0.000464295	ZNF302	2.37186	2.55114	0.105125	0.0401387	0.107589
OAS1	4.15643	3.77531	-0.138751	0.100996	0.193227	PDRG1	3.5851	3.42823	-0.0645482	0.00198923	0.00756792	GRAMD1A	3.94755	4.03427	0.0313521	0.38692	0.49617
GCN1L1	3.75088	3.65309	-0.0381117	0.42025	0.518789	EPB41L1	4.32988	3.92478	-0.141716	0.000322513	0.00176978	FXYD3	5.91143	5.7622	-0.0368885	0.730308	0.779431
RPLP0	8.40691	8.34016	-0.0114991	0.673727	0.731758	SLC15A1	2.28442	1.955	-0.224657	0.11461	0.186186	HEPH	2.85951	3.21685	0.169881	0.0200044	0.0665785
PXN	4.60302	4.32002	-0.0915427	0.00925683	0.0374778	DOCK9	2.51108	2.71898	0.11476	0.0388431	0.0799407	CDIP1	2.90358	3.03794	0.0652616	0.336503	0.451142
SIRT4	0.784938	1.00125	0.351149	0.00601841	0.0281309	ANKRD10	5.30298	4.90499	-0.112553	0.000260236	0.00149333	CMTM1	0.950289	1.15301	0.278972	0.0102213	0.0419356
RPH3A	0.0252671	0.0495342	0.971165	0.0060144	0.0281309	TGDS	2.70291	2.54821	-0.0850324	0.00308906	0.0107223	KCNH4	0.178541	0.241185	0.433882	0.00435367	0.0231155
KIF16B	2.31769	2.19852	-0.0761523	0.346026	0.453241	DOCK3	0.267909	0.519132	0.954362	0.000491046	0.00248121	GANAB	6.06483	6.30012	0.054912	0.00751168	0.033818
TRMT6	2.56608	2.35572	-0.123395	0.00573051	0.0272824	C3orf18	1.26625	1.79194	0.500961	7.86531e-10	1.05794e-07	GMIP	3.19601	3.24044	0.0199151	0.84614	0.873606
CHGB	2.87038	4.55046	0.66477	5.21043e-05	0.00134375	COQ9	3.7177	3.37648	-0.138893	7.90359e-09	4.85918e-07	RBM41	1.32354	1.42402	0.105563	0.15102	0.262809
PEBP1	6.79684	7.14435	0.0719393	0.000235927	0.00350456	KIF9	1.25048	1.12518	-0.152324	0.0668148	0.122214	BIRC5	2.17681	2.19505	0.0120369	0.814102	0.847461
ERP29	5.74058	5.76972	0.00730512	0.401993	0.503612	ARHGAP28	0.250303	0.56081	1.16384	1.13311e-08	6.5319e-07	LAG3	0.945518	1.05446	0.157324	0.391951	0.500395
NOS1	0.0694808	0.14671	1.07828	3.68839e-05	0.00108654	CRLS1	3.50325	3.11656	-0.168738	2.8595e-05	0.000258275	DDX24	4.16903	4.46356	0.0984815	0.000734423	0.00672447
FUS	4.63549	4.44487	-0.0605784	0.0211281	0.0662022	PPP1R13B	2.44494	2.18967	-0.159085	0.00440204	0.0142491	ZBTB25	1.027	1.26571	0.301506	8.98658e-06	0.000265774
IGBP1	5.4971	5.29598	-0.0537733	0.00240146	0.0153172	ATRN	2.90146	3.20749	0.144664	0.00257664	0.0092868	NECAP1	3.10012	3.29568	0.0882525	0.0856113	0.179206
FXYD5	6.39016	5.62587	-0.183776	1.12918e-05	0.000495561	SMOX	4.01953	3.45192	-0.219629	0.000153664	0.000986439	ARHGAP4	2.71078	2.99919	0.145867	0.239719	0.358878
ZNF302	2.32088	2.37186	0.0313459	0.662055	0.722025	SIGLEC1	1.18647	1.81771	0.615452	0.000120024	0.000809485	ANKRD24	0.616209	0.556471	-0.147112	0.103588	0.204106
FXYD3	7.04099	5.91143	-0.252272	3.32129e-05	0.00101516	NSFL1C	3.74879	3.66663	-0.0319706	0.0923405	0.157277	DHX32	3.54686	3.50433	-0.0173998	0.412468	0.517802
HEPH	3.20843	2.85951	-0.166099	0.166538	0.272968	SLC4A11	2.77951	2.08141	-0.417271	0.000238639	0.00139502	RCOR1	3.01093	3.19231	0.0843884	0.0839616	0.176793
CDIP1	2.36997	2.90358	0.292964	4.57679e-06	0.000260588	C20orf194	1.77762	2.16245	0.282721	8.32622e-05	0.000602389	GPATCH2L	1.17615	1.42281	0.274674	9.57631e-06	0.000276934
CMTM1	1.30673	0.950289	-0.459519	0.00296513	0.0176153	ZNF343	1.78595	1.81374	0.0222796	0.479504	0.556095	LTBP4	3.979	4.25911	0.0981446	0.0716712	0.158781
GMIP	3.46842	3.19601	-0.118005	0.00469901	0.0239325	EBF4	2.18153	2.39387	0.134003	0.217217	0.305632	BLVRB	5.21815	5.07646	-0.0397157	0.0596482	0.140818
RBM41	1.62174	1.32354	-0.293141	0.000767381	0.00728699	CPXM1	3.28414	4.48699	0.450232	6.91442e-08	2.44566e-06	SLC9A1	4.08376	3.95147	-0.0475109	0.391951	0.500395
BIRC5	2.59646	2.17681	-0.254329	0.0288602	0.0814471	MAVS	2.97692	3.15223	0.0825548	0.0358063	0.0750659	SPTLC1	3.81261	4.00147	0.069751	0.1168	0.221467
LAG3	0.853652	0.945518	0.147458	0.246514	0.358058	LZTS3	3.00418	2.68315	-0.163042	0.0143448	0.0365964	PAPOLA	3.62958	3.81416	0.0715633	0.00956749	0.0400085
MLF2	5.60567	5.36238	-0.0640135	0.0282778	0.0804205	XRN2	4.6838	4.78203	0.0299437	0.338736	0.428089	CCNK	1.01341	1.13301	0.160948	0.0424084	0.11147
OTUB2	0.92662	0.748541	-0.307897	0.030056	0.0835898	KIZ	1.85698	2.06538	0.153451	0.021835	0.0508305	PCBP4	3.20253	3.34552	0.0630184	0.352818	0.465181
ZBTB25	1.11131	1.027	-0.113821	0.115052	0.211869	DYNLL1	5.90677	5.82396	-0.0203703	0.193426	0.279895	RGS1	3.94352	4.50166	0.190974	0.00131802	0.0101705
NECAP1	3.20984	3.10012	-0.0501741	0.218309	0.329698	TESC	6.19269	4.91693	-0.33281	1.31375e-07	3.90852e-06	YPEL3	4.10785	4.17155	0.0221975	0.533134	0.618452
ARHGAP4	2.68049	2.71078	0.0162111	0.492908	0.581398	RPL6	6.77104	6.86738	0.0203829	0.330402	0.42004	MRPS33	2.54564	2.48362	-0.0355816	0.0969825	0.195148
DHX32	3.85754	3.54686	-0.121142	0.00014624	0.00257774	SIRPG	0.625116	1.11902	0.840036	0.000939228	0.00418555	MAEA	2.8458	2.87504	0.0147473	0.582198	0.659391
RCOR1	3.3611	3.01093	-0.158723	0.00481803	0.0243381	MAPKAPK5	1.72389	1.67487	-0.0416114	0.532685	0.602884	ICAM1	3.95493	4.31715	0.126428	0.00330251	0.0191778
GPATCH2L	1.22225	1.17615	-0.0554724	0.513361	0.598954	P2RX7	0.707091	1.15106	0.703	6.82258e-07	1.36786e-05	IRAK3	1.76997	2.04976	0.211727	0.00429155	0.0228788
BLVRB	5.69564	5.21815	-0.126321	0.000228621	0.00343435	ESF1	2.60187	2.77519	0.0930374	0.100102	0.167441	LYZ	8.74853	7.95966	-0.136333	0.00771869	0.0344274
SLC9A1	4.29909	4.08376	-0.0741341	0.156924	0.261737	RBBP9	2.51009	2.72594	0.119017	0.00375875	0.0125745	SI	0.580896	0.341276	-0.76734	0.438713	0.541303
SPTLC1	3.83682	3.81261	-0.00913266	0.477859	0.56888	ANAPC5	3.18767	3.29902	0.0495358	0.169874	0.252904	MUL1	4.1351	4.18836	0.0184657	0.672781	0.731722
PAPOLA	3.66179	3.62958	-0.0127446	0.448529	0.543806	SLC23A2	2.34134	2.76402	0.239428	0.000390239	0.00206279	TFAP4	1.54276	1.36026	-0.181627	0.000465832	0.00484698
CCNK	1.0668	1.01341	-0.0740768	0.221323	0.332687	SLC8B1	3.01554	3.05454	0.0185381	0.236394	0.326096	PDCD7	2.60878	2.81401	0.109251	0.000797772	0.00713747
PCBP4	3.3818	3.20253	-0.0785798	0.215324	0.326567	TMEM230	4.84347	4.99207	0.0435961	0.0282785	0.0622593	SPG21	4.4546	4.49707	0.0136895	0.730308	0.779431
RGS1	3.55644	3.94352	0.149051	0.0730654	0.154908	KDM2B	1.38222	1.63773	0.244705	6.15189e-05	0.00047354	FETUB	0.0656492	0.0239529	-1.45458	0.0078679	0.034894
YPEL3	4.27536	4.10785	-0.0576599	0.256459	0.368313	CFAP61	0.0600833	0.19616	1.70699	0.000296092	0.00165749	DNAJB11	3.78584	3.82476	0.0147562	0.417695	0.522759
MRPS33	2.69099	2.54564	-0.0801063	0.116912	0.21418	LHX5	0.123515	0.197162	0.674693	0.917826	0.932108	P3H2	2.44295	2.39283	-0.0299064	0.563554	0.643813
NDUFB2	4.21458	3.97546	-0.0842683	0.0359782	0.0943976	TASP1	2.27774	2.42514	0.090463	0.0449801	0.0895601	THPO	0.317844	0.41481	0.384132	0.00435367	0.0231155
NUDC	5.44401	5.28268	-0.0434006	0.138967	0.240524	OAS1	4.15643	3.70028	-0.167709	0.0241707	0.0549857	CHRD	1.54066	1.68027	0.125142	0.096067	0.194133
MAEA	2.96826	2.8458	-0.0607831	0.0797183	0.1644	GCN1L1	3.75088	3.81566	0.0247056	0.403911	0.488375	FLT3LG	0.854565	0.898277	0.0719708	0.656201	0.718542
ICAM1	3.6495	3.95493	0.115951	0.206547	0.317109	RPLP0	8.40691	8.14173	-0.0462396	0.00999312	0.0274552	RAB11FIP3	3.03323	3.19979	0.0771206	0.00502116	0.0255089
STRN4	3.7924	3.63666	-0.0604999	0.1433	0.245683	PXN	4.60302	4.49055	-0.0356899	0.0443903	0.088694	GNPTG	4.05275	4.06614	0.00475939	0.950851	0.959894
IRAK3	1.85615	1.76997	-0.0685878	0.366937	0.472222	SIRT4	0.784938	0.884569	0.172397	0.107162	0.176864	ZNF268	1.09477	1.15379	0.0757482	0.230716	0.349835
LYZ	9.26593	8.74853	-0.082895	0.132656	0.233051	RPH3A	0.0252671	0.0903313	1.83797	0.026889	0.059853	GOLGA3	3.29327	3.56786	0.115538	8.53512e-05	0.0013905
SI	0.418617	0.580896	0.472648	0.595544	0.667108	TRMT6	2.56608	2.53345	-0.0184637	0.554763	0.621319	PABPC4	4.75535	4.485	-0.0844444	0.000498784	0.005095
MUL1	4.02905	4.1351	0.0374825	0.236842	0.348802	CHGB	2.87038	4.70827	0.713955	0.000579083	0.00283748	CD209	1.00281	1.36596	0.445868	0.00611125	0.0293053
TFAP4	1.57349	1.54276	-0.0284504	0.523752	0.607829	PEBP1	6.79684	7.07453	0.0577708	0.0282785	0.0622593	CERS4	2.35369	2.1878	-0.105443	0.0695396	0.155602
PDCD7	2.61963	2.60878	-0.00598379	0.856803	0.880973	TBX5	0.0253868	0.051191	1.01181	0.0554208	0.105685	MCOLN1	2.80248	3.03139	0.113277	0.00509276	0.025783
SPG21	4.55036	4.4546	-0.030685	0.534249	0.616378	BRAP	2.51135	2.61687	0.0593764	0.158118	0.238999	USP48	2.70388	2.87632	0.0891902	0.0195227	0.0654164
DNAJB11	4.03843	3.78584	-0.0931807	0.000228621	0.00343435	ERP29	5.74058	5.7254	-0.00381848	0.639336	0.693719	EFNB1	5.04283	4.87294	-0.0494427	0.301066	0.419422
P3H2	2.86245	2.44295	-0.228625	0.0374216	0.0969653	NOS1	0.0694808	0.139942	1.01014	0.00569845	0.0175756	PDPR	2.20132	2.3378	0.0867837	0.10456	0.205371
THPO	0.22444	0.317844	0.501986	0.000745379	0.00716322	FUS	4.63549	4.62452	-0.00341795	0.496902	0.571416	AARS	4.92714	5.06742	0.0405001	0.0207464	0.0682557
CHRD	1.20634	1.54066	0.352915	8.64833e-05	0.00185409	IGBP1	5.4971	5.24894	-0.0666448	0.000102373	0.000709822	GLG1	4.12879	4.40778	0.094335	7.19015e-07	4.11944e-05
FLT3LG	0.80187	0.854565	0.0918209	0.291608	0.40214	FXYD5	6.39016	5.97304	-0.0973864	0.00123581	0.00519608	KIF4A	1.53483	1.61109	0.069955	0.569736	0.648819
RAB11FIP3	2.79533	3.03323	0.117838	0.00559126	0.0268527	ZNF302	2.32088	2.55114	0.136471	0.00863998	0.024419	TNRC6A	2.28104	2.49438	0.128989	0.0106324	0.0429656
GNPTG	4.10494	4.05275	-0.0184602	0.550191	0.629446	FXYD3	7.04099	5.7622	-0.28916	1.82187e-06	2.94066e-05	PLEKHG2	2.20002	2.71203	0.301855	9.96973e-07	5.12253e-05
ZNF268	1.05934	1.09477	0.0474671	0.333852	0.442016	HEPH	3.20843	3.21685	0.00378205	0.679483	0.727691	DLL3	0.0826894	0.158671	0.94026	0.0300999	0.0882357
GOLGA3	3.44352	3.29327	-0.0643606	0.122635	0.220957	CDIP1	2.36997	3.03794	0.358226	9.1185e-08	3.00282e-06	NAT14	2.90794	3.26964	0.169131	0.0702443	0.156782
PABPC4	4.28861	4.75535	0.149041	6.4819e-07	6.49491e-05	CMTM1	1.30673	1.15301	-0.180547	0.184098	0.26935	PITPNM2	1.31281	1.5053	0.197397	0.00995514	0.0411333
CD209	0.546062	1.00281	0.876912	0.000643892	0.00654807	GANAB	6.06853	6.30012	0.0540319	0.00440204	0.0142491	EXOC1	3.12225	3.2969	0.0785215	0.0997711	0.19886
CERS4	1.41853	2.35369	0.730533	3.01772e-09	2.68889e-06	GMIP	3.46842	3.24044	-0.0980897	0.0128705	0.0336288	RBM27	2.04565	2.19435	0.101233	0.0371348	0.101799
MCOLN1	2.77631	2.80248	0.0135354	0.709208	0.761362	RBM41	1.62174	1.42402	-0.187577	0.0063075	0.0190562	POU4F3	0.0501354	0.0578084	0.20545	0.283515	0.402694
USP48	2.68783	2.70388	0.00859208	0.703248	0.756532	BIRC5	2.59646	2.19505	-0.242292	0.0316317	0.0681442	OSBPL8	2.74032	3.13349	0.193428	0.00107023	0.00877
EFNB1	5.64985	5.04283	-0.163979	0.00383856	0.0209428	LAG3	0.853652	1.05446	0.304782	0.0245214	0.0556158	DTX2	2.74421	2.70747	-0.0194416	0.676116	0.734271
PDPR	2.2649	2.20132	-0.0410775	0.733223	0.780816	MLF2	5.60567	5.36884	-0.0622753	0.0101546	0.0278187	NLRC4	0.900763	0.994309	0.142547	0.404701	0.511191
KIF4A	1.84895	1.53483	-0.268627	0.0277055	0.0793013	OTUB2	0.92662	0.744954	-0.314825	0.0589754	0.110971	PUS7	1.94646	2.04403	0.0705639	0.118946	0.223895
DLL3	0.0769365	0.0826894	0.104034	0.0231858	0.0706852	DDX24	4.20705	4.46356	0.0853869	0.00257664	0.0092868	LAMB1	5.1354	5.72341	0.156398	1.18208e-05	0.000324597
NAT14	3.0083	2.90794	-0.0489501	0.566364	0.642376	ZBTB25	1.11131	1.26571	0.187685	0.0111728	0.0299637	SLC26A4	0.206666	0.220827	0.095618	0.799958	0.835596
PITPNM2	1.22001	1.31281	0.105764	0.253114	0.365272	ARHGAP4	2.68049	2.99919	0.162078	0.0612427	0.114254	SLC26A3	0.600974	0.172751	-1.7986	0.381353	0.491588
EXOC1	3.31822	3.12225	-0.0878215	0.0234765	0.0710908	ANKRD24	0.764614	0.556471	-0.458425	0.0329743	0.0703017	DLD	3.69846	3.71889	0.00794935	0.958125	0.965778
RBM27	2.20929	2.04565	-0.111023	0.0239725	0.0721239	DHX32	3.85754	3.50433	-0.138542	5.35427e-06	6.77262e-05	WDR7	1.08677	1.28314	0.239637	0.0103567	0.0423074
POU4F3	0.0429597	0.0501354	0.222847	0.308766	0.419287	RCOR1	3.3611	3.19231	-0.0743344	0.0604791	0.113183	IL5RA	0.0869336	0.130427	0.58526	0.0493484	0.12368
OSBPL8	2.55891	2.74032	0.0988147	0.0960914	0.187057	GPATCH2L	1.22225	1.42281	0.219202	0.00034376	0.00186494	ABCC6	1.04027	0.658652	-0.659367	4.22401e-08	4.59042e-06
DTX2	3.28925	2.74421	-0.261371	0.000464149	0.00533981	LTBP4	3.99534	4.25911	0.0922319	0.0383223	0.0791588	CMTM6	4.78685	5.03036	0.0715834	0.0239594	0.0755502
NLRC4	0.649742	0.900763	0.471281	0.00173782	0.0123998	BLVRB	5.69564	5.07646	-0.166037	1.48239e-07	4.30735e-06	RAPGEF4	0.980264	1.18065	0.268337	0.0509534	0.12643
PUS7	2.12292	1.94646	-0.125204	0.0692966	0.149399	SLC9A1	4.29909	3.95147	-0.121645	0.0126712	0.033205	pk	2.10955	2.29911	0.124135	0.0316978	0.091108
LAMB4	0.0445743	0.0875768	0.974338	8.94108e-05	0.00189075	SPTLC1	3.83682	4.00147	0.0606184	0.518217	0.590264	SMPX	0.42123	0.514923	0.28975	0.502107	0.592856
NRCAM	1.0622	1.68032	0.661684	5.21043e-05	0.00134375	PAPOLA	3.66179	3.81416	0.0588187	0.199186	0.285877	FH	4.51996	4.46959	-0.0161687	0.296818	0.415257
LAMB1	4.94169	5.1354	0.0554723	0.0568192	0.130157	CCNK	1.0668	1.13301	0.0868713	0.733049	0.77315	SEL1L3	4.71453	4.44862	-0.0837555	0.110547	0.21332
SLC26A4	0.117328	0.206666	0.816748	0.00058933	0.00620539	PCBP4	3.3818	3.34552	-0.0155614	0.558486	0.62439	TF	0.34949	0.542019	0.633093	0.652906	0.715906
SLC26A3	0.3679	0.600974	0.70799	1	1	RGS1	3.55644	4.50166	0.340025	2.89742e-06	4.20736e-05	CDV3	5.11043	5.28679	0.0489485	0.00461036	0.0240723
DLD	3.68469	3.69846	0.00537937	0.685478	0.741783	YPEL3	4.27536	4.17155	-0.0354624	0.410187	0.493713	ALKBH5	4.67122	4.9801	0.092373	3.22251e-05	0.00068412
WDR7	0.922328	1.08677	0.236691	0.00204507	0.0137698	MRPS33	2.69099	2.48362	-0.115688	0.00541475	0.0168806	NLRP1	2.01257	2.61491	0.377727	4.00969e-05	0.00079572
TXNL1	2.43938	2.47879	0.0231201	0.128574	0.228188	NDUFB2	4.21458	3.98244	-0.0817364	0.0162104	0.0402032	PITPNM3	1.14241	1.29152	0.176988	0.422961	0.527517
IL5RA	0.0359788	0.0869336	1.27277	0.000702983	0.00691398	NUDC	5.44401	5.28188	-0.0436182	0.0546496	0.104562	SPAG7	3.85921	3.98527	0.0463711	0.160325	0.274126
ABCC6	0.866752	1.04027	0.263264	0.016309	0.0553118	MAEA	2.96826	2.87504	-0.0460358	0.145449	0.224098	ORC6	0.890926	0.954145	0.0989015	0.47489	0.57066
CMTM6	5.09898	4.78685	-0.0911307	0.01667	0.0561885	ICAM1	3.6495	4.31715	0.24238	9.55844e-05	0.000671364	ZFHX4	0.527187	0.822045	0.640903	3.03477e-05	0.000657517
ITGA6	5.66602	5.26208	-0.106704	0.0108877	0.0419426	STRN4	3.7924	3.72016	-0.0277468	0.0303363	0.0658636	CPA1	8.96898	3.31132	-1.43754	4.65493e-11	2.49961e-08
RAPGEF4	0.745682	0.980264	0.39461	0.0094756	0.0381096	IRAK3	1.85615	2.04976	0.143139	0.199186	0.285877	ZC3HC1	2.41536	2.48131	0.0388615	0.491988	0.584208
pk	2.07122	2.10955	0.0264546	0.794368	0.829654	LYZ	9.26593	7.95966	-0.219228	8.52059e-05	0.000613662	ESR1	0.310525	0.396137	0.351289	0.0702443	0.156782
SMPX	0.439586	0.42123	-0.0615369	0.676645	0.734713	SI	0.418617	0.341276	-0.294692	0.70346	0.748323	RGS17	0.611828	0.780423	0.351129	0.0339382	0.0955713
FH	4.78261	4.51996	-0.081488	0.00519166	0.0255885	MUL1	4.02905	4.18836	0.0559482	0.107162	0.176864	ANGPT2	1.12703	1.59356	0.499724	7.90956e-06	0.000242458
SEL1L3	4.78886	4.71453	-0.0225669	0.566364	0.642376	TFAP4	1.57349	1.36026	-0.210077	0.0016169	0.00642144	TMEM101	3.65288	3.59992	-0.02107	0.38692	0.49617
TF	0.272917	0.34949	0.356788	0.154588	0.259015	PDCD7	2.61963	2.81401	0.103267	0.00331885	0.0113467	CD200	2.28015	3.03493	0.412536	3.31535e-06	0.000127163
CDV3	5.02429	5.11043	0.0245241	0.291608	0.40214	FETUB	0.0752652	0.0239529	-1.65178	0.00209566	0.00789384	CCDC80	4.20591	4.88395	0.215631	0.00078471	0.00704592
MYO15A	0.120911	0.102949	-0.232023	0.325891	0.434708	DNAJB11	4.03843	3.82476	-0.0784244	0.000739027	0.00345233	CMA1	0.621099	0.542952	-0.193999	0.381799	0.491588
ALKBH5	4.61875	4.67122	0.0162974	0.41564	0.514804	P3H2	2.86245	2.39283	-0.258531	0.0134851	0.034872	PSME1	6.70056	6.58863	-0.0243048	0.0355058	0.0986668
APOH	1.31329	2.05904	0.648782	0.000507859	0.00566199	THPO	0.22444	0.41481	0.886118	2.61375e-07	6.54579e-06	PPP2R3C	2.42858	2.69886	0.152235	2.02463e-05	0.000485947
NLRP1	1.91984	2.01257	0.0680478	0.463064	0.556051	CHRD	1.20634	1.68027	0.478057	2.12356e-07	5.56125e-06	HAUS4	2.9461	3.04186	0.0461443	0.178747	0.294482
PITPNM3	1.28374	1.14241	-0.168275	0.273648	0.385163	FLT3LG	0.80187	0.898277	0.163792	0.0532678	0.102472	JPH4	0.390118	0.571033	0.549664	0.260392	0.379354
SPAG7	3.89522	3.85921	-0.0133985	0.984004	0.98658	RAB11FIP3	2.79533	3.19979	0.194959	3.14183e-06	4.46274e-05	MYH7	0.395058	0.0762885	-2.37253	4.44181e-09	7.50886e-07
ORC6	1.16066	0.890926	-0.381566	0.00304349	0.0179011	GNPTG	4.10494	4.06614	-0.0137008	0.459071	0.538327	CEBPE	0.164625	0.215524	0.388668	0.198688	0.31672
ZFHX4	0.450436	0.527187	0.226992	0.116912	0.21418	ZNF268	1.05934	1.15379	0.123215	0.0415384	0.084253	SLC7A8	3.13772	3.49946	0.157417	0.0634549	0.146673
SLC17A6	0.0731453	0.14267	0.963849	0.00315024	0.0183246	GOLGA3	3.44352	3.56786	0.0511778	0.113341	0.184575	OSGEP	2.64538	2.82598	0.0952752	0.0554485	0.133919
CPA1	2.72117	8.96898	1.72072	3.3251e-09	2.68889e-06	PABPC4	4.28861	4.485	0.0645967	0.00198923	0.00756792	SLC22A17	2.74101	3.38006	0.302337	0.00151949	0.0112497
ZC3HC1	2.38162	2.41536	0.0202935	0.438984	0.535742	CD209	0.546062	1.36596	1.32278	1.06156e-08	6.20686e-07	RNF31	2.15999	2.32059	0.103468	0.0933618	0.190324
ESR1	0.163968	0.310525	0.921299	8.94108e-05	0.00189075	CERS4	1.41853	2.1878	0.625089	8.31734e-08	2.79685e-06	SCFD1	2.97331	3.0845	0.0529696	0.041946	0.110743
RGS17	0.49665	0.611828	0.300898	0.0359782	0.0943976	MCOLN1	2.77631	3.03139	0.126813	0.00267244	0.00955991	G2E3	1.2812	1.44919	0.177755	0.00509276	0.025783
ANGPT2	1.29603	1.12703	-0.201572	0.18178	0.290707	USP48	2.68783	2.87632	0.0977823	0.0111728	0.0299637	HECTD1	3.33767	3.48923	0.0640672	0.0847832	0.177949
TMEM101	3.86001	3.65288	-0.0795688	0.0312941	0.086015	EFNB1	5.64985	4.87294	-0.213422	7.33067e-06	8.78025e-05	HNRNPC	5.30198	5.47472	0.046253	0.0306261	0.0889517
CD200	1.93976	2.28015	0.233253	0.0174131	0.0580078	PDPR	2.2649	2.3378	0.0457062	0.293283	0.383854	RPGRIP1	0.162402	0.155301	-0.0645058	0.472073	0.568347
CCDC80	3.30453	4.20591	0.34797	0.000137064	0.00247689	AARS	4.96954	5.06742	0.0281387	0.15649	0.237119	SUPT16H	3.90955	4.10241	0.0694711	0.00883236	0.0378178
CMA1	0.131427	0.621099	2.24056	5.74591e-07	6.03882e-05	GLG1	4.16903	4.40778	0.080341	0.00425102	0.0138652	TOX4	3.26861	3.44093	0.0741222	0.00183232	0.0127912
PSME1	6.8705	6.70056	-0.036133	0.346026	0.453241	KIF4A	1.84895	1.61109	-0.198672	0.0492964	0.0963859	GEMIN2	1.80793	1.94952	0.108778	0.0124276	0.0480233
PPP2R3C	2.4008	2.42858	0.0166002	0.472899	0.564418	TNRC6A	2.29592	2.49438	0.11961	0.0167088	0.0411049	TGM1	0.613004	0.541883	-0.177914	0.327402	0.44293
HAUS4	3.08484	2.9461	-0.0663861	0.0668738	0.14559	PLEKHG2	2.24059	2.71203	0.275493	1.65944e-05	0.00016764	TINF2	4.19094	4.39883	0.0698442	0.000939954	0.00801848
JPH4	0.247887	0.390118	0.654228	0.000539099	0.00586194	DLL3	0.0769365	0.158671	1.04429	4.44737e-05	0.000367196	DAZL	0.0481854	0.099069	1.03984	0.106911	0.208404
MYH7	0.0929687	0.395058	2.08725	5.51549e-08	1.19818e-05	NAT14	3.0083	3.26964	0.120181	0.234206	0.323753	SEMA6A	1.72097	1.53903	-0.161197	0.11157	0.214569
CEBPE	0.114028	0.164625	0.529785	0.0344962	0.09197	PITPNM2	1.22001	1.5053	0.303161	0.000406994	0.0021356	TRPM7	1.99853	2.16542	0.115707	0.0438217	0.113991
SLC7A8	2.93309	3.13772	0.0972923	0.277178	0.388508	EXOC1	3.31822	3.2969	-0.00930001	0.252115	0.342327	TYRO3	1.38606	1.26019	-0.137349	0.0125886	0.0484475
OSGEP	2.95616	2.64538	-0.16025	0.0028886	0.0173254	POU4F3	0.0429597	0.0578084	0.428297	0.0636822	0.117785	WDR76	1.33639	1.44159	0.109317	0.0823378	0.174393
SLC22A17	2.33722	2.74101	0.229918	0.00233837	0.0150521	OSBPL8	2.55891	3.13349	0.292242	1.01502e-06	1.86054e-05	CAPN3	0.336103	0.403539	0.263807	0.106527	0.207802
RNF31	2.15685	2.15999	0.00209982	0.958426	0.966272	DTX2	3.28925	2.70747	-0.280813	1.22586e-05	0.000131935	SNAP23	3.13969	3.25929	0.0539345	0.0504136	0.125534
SCFD1	3.00624	2.97331	-0.0158918	0.149994	0.253276	NLRC4	0.649742	0.994309	0.613828	6.59981e-05	0.000499959	TBX15	0.786708	0.987026	0.32726	0.0681476	0.153528
G2E3	1.35184	1.2812	-0.0774303	0.318055	0.427293	PUS7	2.12292	2.04403	-0.0546397	0.459071	0.538327	PHGDH	3.17912	2.4099	-0.399656	5.28927e-07	3.28462e-05
HECTD1	3.43834	3.33767	-0.0428712	0.218309	0.329698	LAMB4	0.0445743	0.12688	1.50919	5.35427e-06	6.77262e-05	COL9A3	1.34531	1.13266	-0.248216	0.0048118	0.0247932
HNRNPC	5.48285	5.30198	-0.0483953	0.0101598	0.0399759	NRCAM	1.0622	1.6913	0.671075	0.00136121	0.00560083	EZR	7.37252	7.38514	0.00246871	0.646334	0.710921
RPGRIP1	0.134316	0.162402	0.273942	0.0229895	0.0701708	LAMB1	4.94169	5.72341	0.21187	2.5369e-09	2.30737e-07	MYL6	7.48422	7.70433	0.0418187	0.020999	0.0688057
SUPT16H	3.96672	3.90955	-0.0209435	0.477859	0.56888	SLC26A4	0.117328	0.220827	0.912366	0.00109945	0.00475369	AGO1	1.87552	1.99964	0.0924488	0.0239594	0.0755502
TOX4	3.35766	3.26861	-0.0387789	0.174035	0.281492	DLD	3.68469	3.71889	0.0133287	0.476064	0.553024	CLSPN	0.578556	0.665306	0.201562	0.11157	0.214569
GEMIN2	1.86301	1.80793	-0.0432922	0.45819	0.551977	WDR7	0.922328	1.28314	0.476327	2.46353e-07	6.22399e-06	RFFL	2.00464	2.10284	0.068998	0.103588	0.204106
TGM1	0.59009	0.613004	0.054961	0.0668738	0.14559	TXNL1	2.43938	2.50458	0.0380501	0.169874	0.252904	UNC13D	3.0667	3.28646	0.0998469	0.153636	0.265992
TINF2	4.12442	4.19094	0.0230835	0.171508	0.278826	IL5RA	0.0359788	0.130427	1.85803	2.06084e-07	5.468e-06	MFSD11	2.14383	2.32379	0.116292	0.00594348	0.028712
DAZL	0.0249341	0.0481854	0.950475	0.0775673	0.161657	ABCC6	0.866752	0.658652	-0.396103	0.0191222	0.0458185	DPYSL2	4.0786	4.35542	0.0947368	0.0266445	0.0814018
TBL1Y	0.0407253	0.0772305	0.923244	0.201498	0.312307	CMTM6	5.09898	5.03036	-0.0195473	0.341543	0.43063	TGFB2	1.98399	2.26394	0.190433	0.0839616	0.176793
SEMA6A	1.25756	1.72097	0.452597	0.000625203	0.00644001	ITGA6	5.66602	5.14465	-0.139264	0.00262414	0.00943307	GPATCH2	1.4101	1.5585	0.144363	0.00335148	0.0193636
TRPM7	1.92985	1.99853	0.0504513	0.270149	0.381582	RAPGEF4	0.745682	1.18065	0.662947	1.2897e-05	0.000137616	NUP50	2.74268	2.89919	0.0800615	0.0176958	0.0611271
TYRO3	1.29596	1.38606	0.096971	0.0428678	0.106772	pk	2.07122	2.29911	0.15059	0.00733062	0.0214046	CDC45	1.43031	1.46912	0.0386266	0.730308	0.779431
WDR76	1.41241	1.33639	-0.079818	0.209444	0.320167	FH	4.78261	4.46959	-0.0976567	0.000143701	0.000935265	COMT	4.39548	4.38002	-0.00508211	0.778867	0.818624
CAPN3	0.373163	0.336103	-0.150904	0.599377	0.670087	SEL1L3	4.78886	4.44862	-0.106322	0.0461795	0.091421	CECR1	3.40883	3.53051	0.0505989	0.545202	0.628272
SNAP23	3.27424	3.13969	-0.0605403	0.0993392	0.191104	TF	0.272917	0.542019	0.98988	0.164758	0.24684	XXbac-B461K10.4	0.0398593	0.0638665	0.680144	0.00100284	0.00837813
TBX15	1.5033	0.786708	-0.93423	4.23811e-05	0.00119076	CDV3	5.02429	5.28679	0.0734726	9.55844e-05	0.000671364	VNN3	0.277281	0.349056	0.33211	0.747538	0.792907
PHGDH	2.55796	3.17912	0.313637	0.0002674	0.00378694	MYO15A	0.120911	0.117716	-0.0386363	0.61184	0.670128	ECHDC1	3.11284	3.13036	0.00810083	0.867645	0.891339
COL9A3	1.0995	1.34531	0.291092	0.00403909	0.0216233	ALKBH5	4.61875	4.9801	0.10867	9.99398e-06	0.000112506	LRRFIP2	2.3638	2.48302	0.070988	0.189297	0.306515
EZR	7.84654	7.37252	-0.0898989	0.00904258	0.0369091	APOH	1.31329	2.09436	0.673319	0.0398961	0.0816233	SEC22C	2.42066	2.6424	0.126447	0.00123664	0.00972065
MYL6	7.64575	7.48422	-0.0308061	0.280739	0.391907	NLRP1	1.91984	2.61491	0.445775	1.2897e-05	0.000137616	XYLB	0.861874	0.809873	-0.0897816	0.284315	0.403057
AGO1	1.73193	1.87552	0.114915	0.0853881	0.172305	SPAG7	3.89522	3.98527	0.0329726	0.148541	0.227626	HDAC6	2.44182	2.66298	0.125087	0.00063202	0.00604769
TEKT2	0.437218	0.750937	0.78034	2.17159e-05	0.000759811	ORC6	1.16066	0.954145	-0.282664	0.00440204	0.0142491	GABRP	3.66091	4.22098	0.205376	0.0716712	0.158781
RFFL	2.17784	2.00464	-0.119557	0.107842	0.202434	ZFHX4	0.450436	0.822045	0.867895	8.32774e-07	1.59379e-05	CDC6	1.4461	1.51453	0.0667054	0.509411	0.598631
UNC13D	3.40378	3.0667	-0.150449	0.0622375	0.138594	SLC17A6	0.0731453	0.231227	1.66047	0.0254546	0.0573194	UPRT	2.16271	2.27895	0.0755317	0.0760952	0.165445
MFSD11	2.20425	2.14383	-0.0401016	0.577271	0.651759	CPA1	2.72117	3.31132	0.283181	0.333162	0.422746	CDC23	2.66753	2.8728	0.106954	0.0233957	0.0743979
DPYSL2	4.05179	4.0786	0.00951519	0.401993	0.503612	ZC3HC1	2.38162	2.48131	0.059155	0.145449	0.224098	AAAS	3.17786	3.25479	0.034512	0.480553	0.575068
TGFB2	1.88779	1.98399	0.071708	0.438984	0.535742	ESR1	0.163968	0.396137	1.27259	5.06995e-08	1.97894e-06	CBX5	2.77311	3.00108	0.113975	0.00423024	0.0226357
GPATCH2	1.64538	1.4101	-0.222623	0.000555381	0.00598314	RGS17	0.49665	0.780423	0.652027	5.34095e-05	0.000425169	FMO2	1.44526	1.50131	0.0548963	0.856879	0.882298
NUP50	2.70598	2.74268	0.0194397	0.41564	0.514804	ANGPT2	1.29603	1.59356	0.298153	0.0150209	0.0378896	SUCO	2.89645	3.08078	0.0890097	0.108522	0.210629
CDC45	1.71358	1.43031	-0.260694	0.0239725	0.0721239	TMEM101	3.86001	3.59992	-0.100639	0.000555792	0.00275016	MSH2	2.36134	2.51794	0.0926366	0.0681476	0.153528
COMT	4.5686	4.39548	-0.0557306	0.0537609	0.125349	CD200	1.93976	3.03493	0.645789	4.80743e-10	8.00773e-08	DHPS	3.9131	4.05244	0.0504799	0.298937	0.417284
CECR1	2.50586	3.40883	0.44397	5.21043e-05	0.00134375	CCDC80	3.30453	4.88395	0.563602	5.87332e-11	2.32343e-08	HOOK2	3.00371	2.85554	-0.072983	0.108522	0.210629
XXbac-B461K10.4	0.0452146	0.0398593	-0.181874	0.323853	0.43325	CMA1	0.131427	0.542952	2.04656	1.52909e-05	0.000157697	ARCN1	5.39734	5.61356	0.0566656	0.0029776	0.0178513
VNN3	0.329155	0.277281	-0.24742	0.739269	0.7854	PSME1	6.8705	6.58863	-0.0604378	0.000939228	0.00418555	EPB41L4B	2.8274	1.96377	-0.525851	2.5127e-09	4.71321e-07
ECHDC1	3.07702	3.11284	0.0166959	0.346026	0.453241	PPP2R3C	2.4008	2.69886	0.168836	2.89742e-06	4.20736e-05	TMEM38B	1.45078	1.64986	0.185512	0.0688407	0.154518
LRRFIP2	2.44909	2.3638	-0.051141	0.346026	0.453241	HAUS4	3.08484	3.04186	-0.0202418	0.3587	0.446311	PSMD5	2.96807	3.05364	0.0410017	0.138448	0.248088
SEC22C	2.17134	2.42066	0.156812	0.000912567	0.0081847	JPH4	0.247887	0.571033	1.20389	4.85777e-05	0.000394264	PTGS1	2.23219	2.52262	0.176469	0.00982439	0.0407591
XYLB	0.903036	0.861874	-0.0673061	0.411061	0.511148	CEBPE	0.114028	0.215524	0.918453	0.00143971	0.00587242	NUP188	2.8728	3.11139	0.115103	0.000710417	0.00658392
HDAC6	2.56152	2.44182	-0.0690446	0.20368	0.314226	SLC7A8	2.93309	3.49946	0.254709	0.00440204	0.0142491	CRAT	4.21284	3.88537	-0.116743	1.71816e-05	0.000430892
GABRP	4.18104	3.66091	-0.19166	0.406512	0.507319	OSGEP	2.95616	2.82598	-0.0649746	0.0597233	0.112088	SH2D3C	2.11931	2.36734	0.159668	0.0602692	0.14175
CDC6	1.74752	1.4461	-0.273141	0.0255153	0.0751798	SLC22A17	2.33722	3.38006	0.532255	4.69332e-07	1.02722e-05	NANS	3.5694	3.47378	-0.0391751	0.489116	0.582034
UPRT	2.15662	2.16271	0.00406868	0.907425	0.924051	RNF31	2.15685	2.32059	0.105568	0.0792123	0.13964	TBC1D2	3.15022	3.36404	0.09474	0.15897	0.272608
CDC23	2.79912	2.66753	-0.0694687	0.0692966	0.149399	G2E3	1.35184	1.44919	0.100325	0.236394	0.326096	DFNB31	1.42399	1.72483	0.276515	0.00586116	0.0284447
AAAS	3.28354	3.17786	-0.0471982	0.243259	0.354861	HNRNPC	5.48285	5.47472	-0.0021423	0.306205	0.396617	PDE6C	0.150926	0.171566	0.184923	0.216814	0.335594
CBX5	2.63698	2.77311	0.0726218	0.195253	0.305434	RPGRIP1	0.134316	0.155301	0.209436	0.086079	0.149058	CWF19L1	2.50636	2.62712	0.0678937	0.157624	0.271029
FMO2	0.824726	1.44526	0.809337	1.45963e-05	0.000587129	SUPT16H	3.96672	4.10241	0.0485276	0.110837	0.18158	SEMA4G	2.9819	2.60205	-0.196586	0.00692021	0.0319536
SUCO	3.11528	2.89645	-0.105078	0.0142839	0.0507396	TOX4	3.35766	3.44093	0.0353433	0.465827	0.544222	BTAF1	2.38135	2.68044	0.170695	0.0121109	0.0471992
MSH2	2.39887	2.36134	-0.0227503	0.638957	0.702453	GEMIN2	1.86301	1.94952	0.0654859	0.146989	0.225888	IKZF5	2.13848	2.30192	0.106256	0.160325	0.274126
MAP3K1	2.4838	2.56474	0.0462602	0.337879	0.445912	TINF2	4.12442	4.39883	0.0929277	2.0901e-06	3.274e-05	BLNK	2.7102	2.24461	-0.271936	0.00227152	0.0148149
DHPS	4.25432	3.9131	-0.120617	5.57906e-05	0.00140259	DAZL	0.0249341	0.099069	1.99031	0.00120121	0.0051083	CYP26A1	0.389459	0.499467	0.358917	0.639789	0.705792
HOOK2	3.3687	3.00371	-0.165446	0.00414287	0.0219519	TBL1Y	0.0407253	0.0881619	1.11423	0.34321	0.432484	TDRD1	0.352343	0.21087	-0.740629	0.000186147	0.00246052
NXPE1	0.082795	0.0459409	-0.849765	0.843265	0.870769	SEMA6A	1.25756	1.53903	0.2914	0.00967709	0.0267537	SORBS1	2.16355	2.67894	0.30826	0.000286164	0.00339259
ARCN1	5.52798	5.39734	-0.0345023	0.0527725	0.123581	TRPM7	1.92985	2.16542	0.166158	0.00417729	0.013662	CRTAC1	1.36618	1.33494	-0.0333662	0.466465	0.563926
EPB41L4B	2.26125	2.8274	0.322358	0.000322065	0.00423303	CAPN3	0.373163	0.403539	0.112903	0.261419	0.352239	BAMBI	2.8459	2.96457	0.0589403	0.270185	0.389293
TMEM38B	1.33178	1.45078	0.123469	0.104374	0.197716	TBX15	1.5033	0.987026	-0.60697	0.00320208	0.0110476	IL11	0.901637	1.42938	0.664766	0.000838178	0.00740463
PSMD5	2.94848	2.96807	0.00955764	0.544851	0.624999	COL9A3	1.0995	1.13266	0.0428767	0.600218	0.659871	WAC	3.42348	3.56041	0.0565799	0.175815	0.291368
PTGS1	1.70837	2.23219	0.385833	0.000177365	0.00292186	EZR	7.84654	7.38514	-0.0874302	0.0286802	0.0629645	CREM	2.09383	2.49185	0.251075	0.000113216	0.00170735
NUP188	2.9633	2.8728	-0.0447496	0.453345	0.547839	MYL6	7.64575	7.70433	0.0110126	0.322203	0.412195	NUBP2	3.19058	3.10237	-0.0404488	0.362362	0.474452
CRAT	3.89369	4.21284	0.113656	0.000912567	0.0081847	AGO1	1.73193	1.99964	0.207364	2.65722e-05	0.000244711	TPSD1	1.08897	1.09414	0.0068341	0.842556	0.870638
SH2D3C	1.64281	2.11931	0.367434	3.43962e-05	0.00103618	TEKT2	0.437218	0.797549	0.867222	0.00308906	0.0107223	SMIM24	4.36312	4.07321	-0.0991965	0.458124	0.557138
NANS	3.88732	3.5694	-0.123094	0.00647475	0.0295331	CLSPN	0.563486	0.665306	0.239638	0.0840697	0.14633	HIVEP1	1.59295	1.87957	0.238702	0.000347175	0.00393044
TBC1D2	3.53992	3.15022	-0.168261	0.111401	0.207028	UNC13D	3.40378	3.28646	-0.0506017	0.445726	0.525559	TREM2	4.11186	4.0368	-0.0265804	0.630026	0.697804
DFNB31	1.41537	1.42399	0.00876602	0.850512	0.876342	MFSD11	2.20425	2.32379	0.0761906	0.0745856	0.133106	CRISP3	4.09662	3.09337	-0.405255	0.0435808	0.113645
PDE6C	0.190158	0.150926	-0.333358	0.0359782	0.0943976	DPYSL2	4.05179	4.35542	0.104252	0.00292634	0.0102682	FKBP5	3.48638	3.91548	0.167461	0.0410339	0.109134
CWF19L1	2.6456	2.50636	-0.0780017	0.107842	0.202434	TGFB2	1.88779	2.26394	0.262141	0.0234822	0.0537567	SRPK1	3.20527	3.22791	0.0101581	0.682806	0.739805
SEMA4G	3.53226	2.9819	-0.24436	0.00296513	0.0176153	GPATCH2	1.64538	1.5585	-0.0782602	0.187788	0.273339	BRPF3	2.66636	2.83409	0.0880139	0.0864459	0.18036
BTAF1	2.55997	2.38135	-0.104347	0.200842	0.311394	NUP50	2.70598	2.89919	0.0995012	0.00532295	0.016636	MRPS18A	3.84513	3.65944	-0.0714094	0.00112325	0.00907681
BLNK	2.90565	2.7102	-0.100461	0.152278	0.256142	CDC45	1.71358	1.46912	-0.222067	0.0174818	0.042604	PGC	5.11855	2.6488	-0.950397	9.37551e-06	0.000273194
TLL2	0.44934	0.355103	-0.33957	0.253114	0.365272	COMT	4.5686	4.38002	-0.0608127	0.0154872	0.0388093	TMEM14A	4.5563	4.47525	-0.0258931	0.205154	0.323917
CYP26A1	0.581081	0.389459	-0.577267	0.259828	0.371558	CECR1	2.50586	3.53051	0.494569	2.67131e-06	3.96134e-05	EFHC1	1.73436	1.90155	0.132775	0.0695396	0.155602
TDRD1	0.133993	0.352343	1.39482	1.56971e-05	0.000615516	XXbac-B461K10.4	0.0452146	0.0638665	0.49827	0.0443903	0.088694	HSP90AB1	8.26847	8.41178	0.0247908	0.192394	0.309898
SORBS1	1.85693	2.16355	0.220483	0.00312374	0.0181932	ECHDC1	3.07702	3.13036	0.0247967	0.247551	0.337553	MLN	0.322931	0.0948479	-1.76754	0.781312	0.821004
CRTAC1	0.904823	1.36618	0.594437	0.000259182	0.00371383	SEC22C	2.17134	2.6424	0.28326	3.8037e-09	3.06975e-07	CDC5L	2.98219	3.11823	0.0643558	0.0560329	0.134903
BAMBI	2.91026	2.8459	-0.0322642	0.35848	0.464525	XYLB	0.903036	0.809873	-0.157088	0.0801651	0.140895	ITPR3	4.02864	4.03096	0.000830154	0.744081	0.790282
IL11	1.07825	0.901637	-0.258078	0.0883429	0.176433	HDAC6	2.56152	2.66298	0.0560419	0.117181	0.189407	ZNF184	1.77361	1.93281	0.124011	0.0245349	0.0767638
MYO3A	0.273343	0.472538	0.789715	2.25062e-05	0.000778692	GABRP	4.18104	4.22098	0.0137163	0.796496	0.827218	DSP	4.92191	4.67891	-0.073046	0.206791	0.32547
CREM	1.99951	2.09383	0.0664938	0.329856	0.438345	CDC6	1.74752	1.51453	-0.206435	0.0620144	0.115506	SIRT1	2.46585	2.66714	0.11321	0.0647676	0.148417
NUBP2	3.317	3.19058	-0.0560569	0.215324	0.326567	UPRT	2.15662	2.27895	0.0796004	0.0891655	0.15319	HNRNPH3	4.24418	4.4868	0.0802006	0.00201	0.0136421
TPSD1	0.851349	1.08897	0.35514	0.0381586	0.0982273	AAAS	3.28354	3.25479	-0.0126862	0.631427	0.686672	JAK2	2.09896	2.31862	0.14359	0.0799498	0.170922
SMIM24	4.83574	4.36312	-0.148376	0.166538	0.272968	CBX5	2.63698	3.00108	0.186597	0.000164275	0.00103553	IL12RB1	1.10078	1.18795	0.109947	0.838996	0.867801
HIVEP1	1.47276	1.59295	0.113178	0.198033	0.30827	FMO2	0.824726	1.50131	0.864234	9.99398e-06	0.000112506	ABL1	3.93152	4.33089	0.139577	4.5111e-06	0.000161281
TREM2	3.43366	4.11186	0.260047	0.00842614	0.0352637	SUCO	3.11528	3.08078	-0.0160679	0.435863	0.516502	ACOT7	2.89789	2.99838	0.0491789	0.43899	0.541303
KCNK16	1.30235	2.18958	0.749536	0.000912135	0.0081847	MSH2	2.39887	2.51794	0.0698863	0.275815	0.36684	SH3GLB1	4.20622	4.50595	0.0993079	4.81639e-06	0.000170416
FKBP5	3.10133	3.48638	0.168844	0.132656	0.233051	MAP3K1	2.4838	2.57322	0.0510265	0.596367	0.656468	CDC7	1.20895	1.36774	0.178038	0.0355058	0.0986668
SRPK1	3.58285	3.20527	-0.160663	0.000507859	0.00566199	DHPS	4.25432	4.05244	-0.0701371	0.000260236	0.00149333	PCSK5	1.68096	1.96904	0.22821	0.0028475	0.017245
BRPF3	2.63921	2.66636	0.0147641	0.794368	0.829654	HOOK2	3.3687	2.85554	-0.238429	6.2979e-05	0.000481673	SCD	4.85413	5.1482	0.0848547	0.0709548	0.157827
MRPS18A	3.97148	3.84513	-0.0466433	0.198033	0.30827	EPB41L4B	2.26125	1.96377	-0.203493	0.0505917	0.0984186	ABLIM1	4.325	4.22288	-0.0344702	0.548239	0.630897
PGC	3.81374	5.11855	0.424527	0.0825088	0.16829	TMEM38B	1.33178	1.64986	0.308981	0.000784978	0.00362502	RAB18	3.40958	3.60745	0.0813876	0.0367217	0.10098
TMEM14A	4.6826	4.5563	-0.0394488	0.0977045	0.18917	PSMD5	2.94848	3.05364	0.0505594	0.0553516	0.105567	NRP1	3.5499	3.75123	0.0795835	0.0799498	0.170922
NCR2	0.0474102	0.0209454	-1.17856	0.0159284	0.0545676	PTGS1	1.70837	2.52262	0.562301	3.67807e-09	3.00218e-07	HSD17B7P2	1.20349	1.41852	0.237159	0.0143038	0.0529572
HSP90AB1	8.47941	8.26847	-0.0363433	0.0319295	0.0870934	NUP188	2.9633	3.11139	0.0703537	0.0245214	0.0556158	PRTFDC1	2.30644	2.51258	0.123507	0.0379728	0.103311
MLN	0.0361681	0.322931	3.15843	0.0841325	0.170646	CRAT	3.89369	3.88537	-0.00308656	0.635376	0.690233	PALMD	1.39023	1.56057	0.166747	0.131301	0.239338
ITPR3	4.43638	4.02864	-0.13909	0.00329006	0.0188981	SH2D3C	1.64281	2.36734	0.527102	3.82907e-07	8.81855e-06	TSPAN15	5.34857	5.01785	-0.0920841	0.0343244	0.0963123
SIRT1	2.35338	2.46585	0.067352	0.083941	0.170344	NANS	3.88732	3.47378	-0.16227	0.000100061	0.000696997	FAM21A	2.78013	2.9121	0.0669075	0.355189	0.467497
HNRNPH3	4.3666	4.24418	-0.0410228	0.192501	0.302627	TBC1D2	3.53992	3.36404	-0.0735207	0.547354	0.614969	MZF1	1.94957	2.13274	0.129555	0.187762	0.304986
IFT74	1.8681	1.96256	0.0711616	0.0692966	0.149399	DFNB31	1.41537	1.72483	0.285281	0.0115319	0.0307367	OCEL1	3.41321	3.32541	-0.0375978	0.491988	0.584208
JAK2	2.07003	2.09896	0.0200224	0.679593	0.736898	PDE6C	0.190158	0.171566	-0.148436	0.278266	0.36926	MYO9B	3.44623	3.8433	0.157325	2.77544e-06	0.000111123
IL12RB1	0.956589	1.10078	0.202559	0.0730654	0.154908	SEMA4G	3.53226	2.60205	-0.440946	8.81349e-07	1.66781e-05	KCNK6	2.9338	2.87904	-0.027186	0.878435	0.900094
ABL1	3.74043	3.93152	0.0718828	0.0743583	0.156852	BTAF1	2.55997	2.68044	0.0663481	0.422911	0.505166	CATSPERG	0.310405	0.313534	0.0144695	0.969043	0.974916
ACOT7	3.04476	2.89789	-0.0713219	0.243259	0.354861	IKZF5	2.16884	2.30192	0.0859149	0.0693274	0.12583	PSMD8	5.30664	5.48434	0.0475184	0.103588	0.204106
CDC7	1.16396	1.20895	0.0547118	0.406512	0.507319	BLNK	2.90565	2.24461	-0.372398	0.000102373	0.000709822	FBXL19	2.76014	2.75779	-0.00123017	0.659504	0.721293
SYDE2	0.495714	0.533753	0.106662	0.184418	0.293732	TLL2	0.44934	0.344958	-0.381385	0.391533	0.477012	STX1B	0.447541	0.508981	0.185592	0.208438	0.326897
PCSK5	1.67665	1.68096	0.0037018	0.920148	0.934556	CYP26A1	0.581081	0.499467	-0.21835	0.476064	0.553024	HSD3B7	3.54396	3.29309	-0.105921	0.0154291	0.0557148
SCD	5.44804	4.85413	-0.166525	0.00274094	0.0167415	SORBS1	1.85693	2.67894	0.528744	2.61697e-08	1.20347e-06	BCL7C	3.37827	3.39257	0.0060965	0.662813	0.724045
TMED1	3.20214	3.24355	0.0185372	0.757503	0.800058	CRTAC1	0.904823	1.33494	0.561071	0.00202671	0.00767553	EFNA2	1.55163	1.32734	-0.225247	0.512344	0.600929
ABLIM1	4.45918	4.325	-0.0440783	0.299008	0.409618	IL11	1.07825	1.42938	0.406688	0.243045	0.332964	ATP5D	4.68923	4.43673	-0.0798556	0.0776185	0.167546
ERMP1	2.89325	2.78806	-0.0534283	0.566364	0.642376	MYO3A	0.273343	0.562586	1.04136	0.0083624	0.0238086	C19orf26	0.3164	0.561713	0.828081	2.85746e-05	0.00062754
NRP1	3.02077	3.5499	0.232863	0.00188571	0.0130623	WAC	3.47613	3.56041	0.0345601	0.240813	0.330902	PRKY	0.538622	0.625575	0.21591	0.476118	0.571935
HSD17B7P2	1.60382	1.20349	-0.414285	0.00058933	0.00620539	CREM	1.99951	2.49185	0.317568	1.97855e-06	3.13352e-05	IGFALS	1.52456	0.914027	-0.738088	5.59426e-05	0.00102273
PRTFDC1	2.43712	2.30644	-0.07951	0.212369	0.323454	NUBP2	3.317	3.10237	-0.0965056	0.040987	0.0834004	2021-03-02	3.8216	3.98699	0.0611257	0.118946	0.223895
PALMD	0.974109	1.39023	0.513171	0.000332135	0.00432069	TPSD1	0.851349	1.09414	0.361974	0.140847	0.218707	NDUFB7	6.75353	6.62868	-0.0269205	0.296818	0.415257
TSPAN15	6.03221	5.34857	-0.173535	1.40734e-05	0.000574357	SMIM24	4.83574	4.07321	-0.247573	0.00921974	0.0256976	TECR	4.16626	4.03716	-0.0454116	0.0433462	0.11312
H2AFY2	3.59495	3.59735	0.000960789	0.913784	0.929308	HIVEP1	1.47276	1.87957	0.35188	4.55924e-07	1.00789e-05	TIMM13	4.63573	4.41224	-0.071285	0.0166316	0.0585817
FAM21A	2.92371	2.78013	-0.0726459	0.518543	0.603765	TREM2	3.43366	4.0368	0.233466	0.00599619	0.0183283	CDC34	4.60441	4.46525	-0.0442751	0.220232	0.33914
MAST3	1.94395	2.08715	0.102543	0.0783497	0.162468	KCNK16	1.30235	2.26743	0.79994	0.0259387	0.058144	MTAP	1.5797	1.54742	-0.0297858	0.750999	0.795962
MZF1	2.29999	1.94957	-0.238476	0.00969897	0.0387405	CRISP3	3.80031	3.09337	-0.296938	0.233109	0.322865	MISP	5.25276	4.87638	-0.107266	0.0560329	0.134903
OCEL1	3.78651	3.41321	-0.149736	0.000789985	0.00743096	FKBP5	3.10133	3.91548	0.336305	0.000603282	0.00293049	CEP170B	3.92504	3.83275	-0.0343283	0.394482	0.502688
KCNK6	3.32832	2.9338	-0.182023	0.00240146	0.0153172	SRPK1	3.58285	3.22791	-0.150505	0.000209374	0.00125703	POLR2E	4.43812	4.47456	0.0117984	0.821197	0.853354
CATSPERG	0.368564	0.310405	-0.247764	0.0743583	0.156852	BRPF3	2.63921	2.83409	0.102778	0.0782687	0.138292	POLRMT	3.19391	3.23182	0.0170246	0.775367	0.815602
PSMD8	5.5592	5.30664	-0.067078	0.00784757	0.0336019	MRPS18A	3.97148	3.65944	-0.118053	8.34544e-06	9.71544e-05	HCN2	0.460498	0.741729	0.687699	0.00382283	0.0211627
FBXL19	3.08621	2.76014	-0.161093	0.00679602	0.0305008	PGC	3.81374	2.6488	-0.525871	0.019694	0.0468692	CDHR5	2.99272	2.70846	-0.143983	0.412468	0.517802
STX1B	0.427109	0.447541	0.0674158	0.1433	0.245683	TMEM14A	4.6826	4.47525	-0.0653419	0.00480107	0.0153106	IZUMO4	1.02225	0.950073	-0.10564	0.112601	0.215945
BCL7C	3.67636	3.37827	-0.121995	0.0177955	0.0589025	EFHC1	1.8156	1.90155	0.0667349	0.426128	0.50789	RASSF7	4.86808	4.59247	-0.0840833	0.124444	0.230817
EFNA2	2.00448	1.55163	-0.36945	0.0249912	0.0742239	NCR2	0.0474102	0.0259001	-0.87224	0.0465188	0.0920609	GADD45B	4.88198	5.42171	0.151281	0.000524911	0.00526758
CIRBP	5.22926	5.31429	0.0232714	0.438984	0.535742	HSP90AB1	8.47941	8.41178	-0.0115525	0.161412	0.242983	PALM	2.37567	2.8736	0.274526	0.000286164	0.00339259
ATP5D	4.97403	4.68923	-0.0850645	0.0578703	0.131729	CDC5L	2.98894	3.11823	0.0610947	0.0388431	0.0799407	MADCAM1	1.33432	1.22374	-0.124809	0.210094	0.328516
C19orf26	0.313287	0.3164	0.0142655	0.901072	0.918619	ITPR3	4.43638	4.03096	-0.138259	0.00152713	0.00613723	MKNK2	5.00411	4.92996	-0.0215362	0.175815	0.291368
PRKY	0.785819	0.538622	-0.544924	0.0854235	0.172334	ZNF184	1.79153	1.93281	0.109503	0.0177463	0.0431167	ARVCF	1.97826	2.12666	0.104358	0.430932	0.534174
IGFALS	1.05981	1.52456	0.52459	0.000450377	0.00523959	DSP	4.91207	4.67891	-0.0701596	0.300992	0.391475	TRMT2A	3.03113	3.18612	0.0719428	0.0383979	0.104167
HNRNPM	5.03942	4.98536	-0.0155599	0.555557	0.633795	SIRT1	2.35338	2.66714	0.180562	0.000277622	0.00157409	RANBP1	3.41541	3.52047	0.0437119	0.193956	0.311608
NDUFB7	7.02731	6.75353	-0.0573296	0.017038	0.0571395	HNRNPH3	4.3666	4.4868	0.0391778	0.139413	0.216863	ZDHHC8	2.95215	3.20542	0.118744	0.00654949	0.0307552
TECR	4.50631	4.16626	-0.113194	0.000682837	0.00680307	IFT74	1.8681	1.97581	0.0808742	0.159759	0.241039	KLHL22	2.36716	2.58931	0.12941	0.00410999	0.0222048
TIMM13	4.81445	4.63573	-0.0545745	0.212369	0.323454	JAK2	2.07003	2.31862	0.163612	0.0334326	0.0710619	MED15	3.53776	3.75509	0.0860133	0.0263338	0.0806778
CDC34	4.89032	4.60441	-0.0869108	0.0177955	0.0589025	IL12RB1	0.956589	1.18795	0.312506	0.040987	0.0834004	SERPIND1	0.342249	0.544756	0.670562	0.11157	0.214569
MTAP	1.3812	1.5797	0.193723	0.18178	0.290707	ABL1	3.74043	4.33089	0.21146	2.71488e-09	2.41557e-07	CRKL	3.79613	4.05519	0.0952423	0.000465832	0.00484698
MISP	6.06498	5.25276	-0.207428	0.00193751	0.0132986	ACOT7	3.04476	2.99838	-0.022143	0.57728	0.640007	LZTR1	2.89174	3.20795	0.149714	8.53512e-05	0.0013905
CEP170B	4.36317	3.92504	-0.152669	0.00131849	0.0103307	SH3GLB1	4.24965	4.50595	0.0844895	0.00198923	0.00756792	MMP11	5.45779	6.21606	0.187682	0.0176958	0.0611271
POLRMT	3.48809	3.19391	-0.127111	0.0113984	0.0432717	CDC7	1.16396	1.36774	0.23275	0.00523256	0.016409	CECR2	0.162467	0.161118	-0.0120251	0.133651	0.242395
CDHR5	3.63703	2.99272	-0.281304	0.0249918	0.0742239	SYDE2	0.495714	0.580314	0.227324	0.0693274	0.12583	SMARCB1	4.78694	4.99961	0.0627114	0.020999	0.0688057
RASSF7	5.6472	4.86808	-0.214183	0.000228621	0.00343435	PCSK5	1.67665	1.96904	0.231912	0.0122808	0.0323953	P2RX6	0.198177	0.365396	0.882671	0.0174783	0.0605745
PALM	2.01068	2.37567	0.240646	0.00696197	0.0310413	SCD	5.44804	5.1482	-0.0816705	0.0546496	0.104562	DERL3	2.90888	2.57307	-0.176975	0.0438217	0.113991
MADCAM1	0.826517	1.33432	0.69099	0.00060702	0.00632024	ABLIM1	4.45918	4.22288	-0.0785485	0.0651818	0.120024	SLC7A4	1.40087	1.31032	-0.0964112	0.545202	0.628272
IGF2-AS	0.276493	0.286271	0.0501402	0.362693	0.468356	ERMP1	2.89325	2.85421	-0.0195957	0.596367	0.656468	BCL2L13	2.84132	2.95646	0.0573068	0.0654323	0.149365
MKNK2	5.15698	5.00411	-0.0434128	0.0960914	0.187057	RAB18	3.47696	3.60745	0.0531551	0.217217	0.305632	DDTL	1.13989	1.09187	-0.0620992	0.367194	0.478628
TRMT2A	3.25789	3.03113	-0.10408	0.0116616	0.044008	NRP1	3.02077	3.75123	0.312446	4.55924e-07	1.00789e-05	DDT	3.59385	3.35528	-0.0990987	0.00237737	0.0152582
RANBP1	3.58809	3.41541	-0.07116	0.0680763	0.147553	HSD17B7P2	1.60382	1.41852	-0.177126	0.0404418	0.0825549	GSTT2	0.172354	0.147805	-0.221685	0.271793	0.391286
ZDHHC8	2.99871	2.95215	-0.0225757	0.888386	0.907772	PALMD	0.974109	1.56057	0.679918	1.77235e-06	2.88166e-05	OSM	1.44565	1.78559	0.304676	0.00859877	0.0370854
KLHL22	2.16803	2.36716	0.126776	0.0136599	0.0491097	TSPAN15	6.03221	5.01785	-0.265619	3.67807e-09	3.00218e-07	CABIN1	3.18622	3.36322	0.0779979	0.0212543	0.0693931
MED15	3.72319	3.53776	-0.0737039	0.12459	0.223344	MAST3	1.94395	2.15332	0.147569	0.129317	0.204511	TBC1D10A	2.02042	2.22388	0.138425	0.0158211	0.0567489
SERPIND1	0.576962	0.342249	-0.753429	0.0359782	0.0943976	MZF1	2.29999	2.13274	-0.108921	0.0811271	0.142185	SUSD2	2.60108	2.7669	0.0891616	0.331933	0.446918
MMP11	6.01562	5.45779	-0.140395	0.107842	0.202434	OCEL1	3.78651	3.32541	-0.187334	9.32646e-07	1.73847e-05	SF3A1	4.2092	4.37239	0.0548762	0.0363125	0.100265
CECR2	0.0680485	0.162467	1.25551	2.01691e-06	0.000148772	MYO9B	3.44984	3.8433	0.155817	1.46347e-05	0.00015197	GGT5	3.88252	4.33375	0.158623	0.000986982	0.00827602
SMARCB1	4.83226	4.78694	-0.0135948	0.869412	0.89125	KCNK6	3.32832	2.87904	-0.209209	0.000567326	0.00279613	RNF215	1.31816	1.42472	0.112149	0.052602	0.129221
DERL3	2.39302	2.90888	0.28163	0.00329006	0.0188981	CATSPERG	0.368564	0.313534	-0.233294	0.053955	0.103509	SEC14L2	2.43496	2.46305	0.0165517	0.792911	0.829817
SLC7A4	1.84917	1.40087	-0.400553	0.00374173	0.0206197	PSMD8	5.5592	5.48434	-0.0195595	0.15649	0.237119	SEC14L3	0.0125022	0.0512283	2.03476	0.134012	0.242985
BCL2L13	2.89213	2.84132	-0.0255701	0.375517	0.479687	FBXL19	3.08621	2.75779	-0.162323	0.000265914	0.00151913	SPECC1L	2.50359	2.74354	0.132039	0.000507355	0.00515372
DDTL	1.29771	1.13989	-0.187067	0.132656	0.233051	STX1B	0.427109	0.508981	0.253008	0.00892566	0.0250559	PPIL2	2.69626	2.82933	0.0695009	0.0379728	0.103311
GSTT2	0.117013	0.172354	0.558715	0.0930027	0.182943	HSD3B7	3.5689	3.29309	-0.116035	0.0299148	0.0651359	UPB1	0.0679575	0.123014	0.856115	0.00423024	0.0226357
CABIN1	3.22854	3.18622	-0.0190389	0.788189	0.824248	BCL7C	3.67636	3.39257	-0.115899	0.00721002	0.0211278	YPEL1	0.582832	0.6406	0.136344	0.213435	0.332091
TBC1D10A	2.22078	2.02042	-0.136413	0.0381616	0.0982273	EFNA2	2.00448	1.32734	-0.594697	0.00068164	0.00323114	SNRPD3	4.9306	4.97902	0.0140976	0.601126	0.67469
SUSD2	2.39424	2.60108	0.119541	0.10961	0.204817	CIRBP	5.22926	5.42259	0.0523767	0.298407	0.388837	PES1	4.1837	4.16499	-0.00646745	0.669452	0.729202
SF3A1	4.11632	4.2092	0.0321909	0.318055	0.427293	ATP5D	4.97403	4.43673	-0.16492	8.92225e-05	0.000636194	MAPK1	3.45467	3.61698	0.066235	0.0428752	0.112233
GGT5	3.63891	3.88252	0.0934877	0.187084	0.296761	C19orf26	0.313287	0.561713	0.842346	0.000160664	0.00101904	GGT1	3.53959	2.80755	-0.334269	0.000163868	0.00222936
SEC14L2	2.81699	2.43496	-0.210257	0.060021	0.135177	PRKY	0.785819	0.625575	-0.329013	0.213959	0.302354	PRODH	0.335757	0.354595	0.0787514	0.0738561	0.162212
SEC14L3	0.0170069	0.0125022	-0.443947	0.437702	0.535393	IGFALS	1.05981	0.914027	-0.213498	0.413346	0.496411	PPM1F	2.12224	2.43671	0.199342	4.60222e-05	0.000881374
SPECC1L	2.3454	2.50359	0.0941656	0.0108877	0.0419426	HNRNPM	5.03942	5.02396	-0.00443231	0.514632	0.587348	TOP3B	0.0978548	0.115013	0.233077	0.0520476	0.128273
PPIL2	2.67819	2.69626	0.00970332	0.984004	0.98658	2021-03-02	3.83887	3.98699	0.0546194	0.0582353	0.109867	CYTH4	1.85376	2.09627	0.177367	0.138448	0.248088
YPEL1	0.42742	0.582832	0.447424	0.000861559	0.00788662	NDUFB7	7.02731	6.62868	-0.0842501	0.000491046	0.00248121	DGCR14	1.969	2.06262	0.0670201	0.156286	0.269215
SNRPD3	5.10626	4.9306	-0.0505024	0.0381616	0.0982273	TECR	4.50631	4.03716	-0.158605	1.37703e-08	7.42971e-07	CRYBB2P1	1.16131	1.3184	0.183036	0.0269583	0.0820767
PES1	4.2254	4.1837	-0.0143088	0.837959	0.865641	TIMM13	4.81445	4.41224	-0.125859	0.000522485	0.00261243	MFNG	2.58208	2.8566	0.145768	0.0537256	0.131205
MAPK1	3.29635	3.45467	0.0676774	0.120703	0.218704	CDC34	4.89032	4.46525	-0.131186	0.000249218	0.00144273	CARD10	3.61516	3.28075	-0.140034	0.00837072	0.0363643
GGT1	3.02047	3.53959	0.228811	0.0325758	0.0883136	MTAP	1.3812	1.54742	0.163937	0.193426	0.279895	LRP5L	1.15531	1.23925	0.101183	0.284315	0.403057
PRODH	0.458328	0.335757	-0.448961	0.354298	0.460857	MISP	6.06498	4.87638	-0.314694	1.82915e-07	5.01005e-06	SLC25A1	5.14305	5.0572	-0.0242844	0.376978	0.487345
PPM1F	2.01136	2.12224	0.0774157	0.100996	0.193227	CEP170B	4.36317	3.83275	-0.186998	3.64476e-05	0.000313016	ADRBK2	1.87295	2.10655	0.169569	0.0723936	0.159833
SLC35E4	1.4996	1.28553	-0.222221	0.0578703	0.131729	POLRMT	3.48809	3.23182	-0.110087	0.00952244	0.0263949	PLA2G3	0.225632	0.172346	-0.388665	0.0862617	0.18036
TOP3B	0.103183	0.0978548	-0.0764875	0.539537	0.620686	HCN2	0.466925	0.741729	0.667702	0.000233509	0.00137034	LGALS2	4.54279	3.32004	-0.452379	1.42628e-05	0.000373312
CRYBB3	0.552456	0.462045	-0.257825	0.184418	0.293732	CDHR5	3.63703	2.70846	-0.425287	0.000398534	0.00209659	GGA1	2.84203	2.94619	0.051928	0.134838	0.243853
CYTH4	1.47002	1.85376	0.334618	0.00160067	0.0117789	IZUMO4	1.15033	0.950073	-0.275943	0.00382575	0.012748	SEZ6L	0.850345	1.36234	0.679963	0.115739	0.220007
CRYBB2P1	1.32169	1.16131	-0.186632	0.0557841	0.128386	RASSF7	5.6472	4.59247	-0.298267	2.12356e-07	5.56125e-06	LGALS1	7.79929	8.36528	0.101071	0.000359499	0.00402504
MFNG	2.68347	2.58208	-0.0555694	0.733223	0.780816	GADD45B	4.69729	5.42171	0.206921	1.23534e-06	2.16733e-05	HPS4	2.17742	2.31592	0.0889671	0.0392601	0.105971
CARD10	3.89106	3.61516	-0.106102	0.0743583	0.156852	PALM	2.01068	2.8736	0.515173	1.93193e-09	1.90206e-07	PIK3IP1	4.23431	4.55606	0.105657	0.0531613	0.13028
LRP5L	1.3999	1.15531	-0.277041	0.016309	0.0553118	MADCAM1	0.826517	1.22374	0.56618	0.129317	0.204511	RP1-37E16.12	0.00655807	0.00468403	-0.48552	0.057184	0.13678
SLC25A1	5.3347	5.14305	-0.0527818	0.130603	0.230632	IGF2-AS	0.276493	0.344001	0.315174	0.103582	0.17206	SRRD	2.04666	2.23746	0.128589	0.0016954	0.0121291
ADRBK2	1.48992	1.87295	0.330075	0.000837059	0.00772814	MKNK2	5.15698	4.92996	-0.064949	0.00783135	0.0225927	TRIOBP	2.02739	1.97423	-0.0383338	0.617108	0.687752
PLA2G3	0.255079	0.225632	-0.176975	0.750872	0.795034	ARVCF	1.90026	2.12666	0.162387	0.205071	0.292186	TFIP11	2.57063	2.67941	0.0597916	0.12003	0.225177
LGALS2	3.57869	4.54279	0.344149	0.00296513	0.0176153	TRMT2A	3.25789	3.18612	-0.0321369	0.361611	0.4489	GCAT	2.9175	2.28621	-0.351772	6.70036e-07	3.88763e-05
GGA1	2.98645	2.84203	-0.071507	0.0453992	0.111234	RANBP1	3.58809	3.52047	-0.0274481	0.270958	0.362044	GGTLC2	0.0290989	0.0326455	0.165921	0.76625	0.808403
HIRA	2.13956	2.22274	0.0550218	0.20368	0.314226	ZDHHC8	2.99871	3.20542	0.0961679	0.040987	0.0834004	CRYBB1	0.609117	0.747673	0.295687	0.0316978	0.091108
SH3BP1	2.34672	2.23559	-0.0699877	0.448529	0.543806	KLHL22	2.16803	2.58931	0.256186	4.56862e-06	5.99044e-05	ANKRD54	2.63415	2.61307	-0.0115913	0.305355	0.423351
SEZ6L	0.485589	0.850345	0.808312	0.000471157	0.00541153	MED15	3.72319	3.75509	0.0123094	0.809364	0.838302	EIF3L	4.96657	5.01218	0.0131871	0.672781	0.731722
LGALS1	7.83624	7.79929	-0.00682002	0.697306	0.751818	SERPIND1	0.576962	0.544756	-0.0828669	0.308834	0.399066	NHP2L1	5.15502	5.32397	0.0465247	0.0228435	0.0731857
HPS4	2.3566	2.17742	-0.114085	0.0312941	0.086015	SNAP29	3.0278	3.04589	0.00859689	0.900696	0.916954	POLR2F	0.0496436	0.0597147	0.266478	0.0997711	0.19886
PIK3IP1	4.07968	4.23431	0.0536709	0.0705347	0.151182	CRKL	3.80477	4.05519	0.0919634	0.00382575	0.012748	CCDC134	1.75402	1.77119	0.0140567	0.925428	0.938345
RP1-37E16.12	0.00645932	0.00655807	0.0218872	0.269753	0.381582	LZTR1	2.98594	3.20795	0.10347	0.000544476	0.00270257	DEPDC5	1.40939	1.5904	0.174321	0.000955394	0.00810295
SRRD	2.12327	2.04666	-0.0530147	0.310343	0.420468	MMP11	6.01562	6.21606	0.0472868	0.58488	0.646557	PICK1	2.90406	2.85749	-0.0233239	0.557403	0.638837
PATZ1	2.94244	3.07973	0.0657926	0.12459	0.223344	CECR2	0.0680485	0.161118	1.24349	3.84227e-06	5.26201e-05	TTC28	1.44802	1.61849	0.160567	0.0254206	0.0788324
TRIOBP	2.13121	2.02739	-0.072054	0.209444	0.320167	SMARCB1	4.83226	4.99961	0.0491166	0.0177463	0.0431167	SLC16A8	0.47519	0.577982	0.282518	0.0661026	0.150331
TFIP11	2.49767	2.57063	0.0415389	0.401993	0.503612	P2RX6	0.189392	0.365396	0.948085	0.0383223	0.0791588	2021-09-03	0.863053	1.15844	0.424656	0.00664045	0.0310705
GCAT	2.72183	2.9175	0.100152	0.128574	0.228188	DERL3	2.39302	2.57307	0.104655	0.469226	0.547166	SLC5A1	3.30311	2.86568	-0.204946	0.133651	0.242395
GGTLC2	0.0308911	0.0290989	-0.0862266	0.632148	0.698042	SLC7A4	1.84917	1.31032	-0.496965	0.000480965	0.00244147	TPTEP1	0.358758	0.461572	0.363545	0.0379728	0.103311
CRYBB1	0.392941	0.609117	0.632408	0.000723964	0.00702992	DDTL	1.29771	1.09187	-0.249166	0.00496965	0.0157326	KDELR3	4.33258	4.39919	0.0220089	0.096067	0.194133
ANKRD54	2.57617	2.63415	0.0321125	0.277178	0.388508	DDT	3.55425	3.35528	-0.0831114	0.0567782	0.107714	CYP2D6	0.519117	0.613945	0.242048	0.183214	0.299444
EIF3L	4.53284	4.96657	0.131836	0.000572121	0.0060884	GSTT2	0.117013	0.147805	0.337029	0.207052	0.294625	DDX17	5.42537	5.65818	0.0606147	0.029929	0.0877929
NHP2L1	5.31164	5.15502	-0.0431814	0.12459	0.223344	OSM	1.33646	1.78559	0.417979	0.00809303	0.0232121	DMC1	0.181821	0.233405	0.360314	0.0383979	0.104167
MICALL1	2.80255	2.95086	0.0743962	0.206547	0.317109	CABIN1	3.22854	3.36322	0.0589589	0.0604791	0.113183	TCF20	2.83761	3.02393	0.0917474	0.0248271	0.0774657
POLR2F	0.0613386	0.0496436	-0.305189	0.120703	0.218704	SUSD2	2.39424	2.7669	0.208702	0.0231444	0.0531788	HSCB	2.80463	2.80154	-0.00159394	0.747538	0.792907
CCDC134	1.66332	1.75402	0.0766007	0.134734	0.235459	SF3A1	4.11632	4.37239	0.0870671	0.00257664	0.0092868	CBY1	3.35629	3.39474	0.0164326	0.560474	0.64107
DEPDC5	1.38446	1.40939	0.0257408	0.534249	0.616378	GGT5	3.63891	4.33375	0.252111	3.14183e-06	4.46274e-05	RSPH14	0.446915	0.39524	-0.177274	0.0223026	0.0718311
PICK1	3.06814	2.90406	-0.0792937	0.0668738	0.14559	RNF215	1.40871	1.42472	0.0163063	0.687627	0.734436	JOSD1	4.32481	4.50845	0.0599946	0.00448035	0.0236005
TTC28	1.10954	1.44802	0.384113	0.000214641	0.00329517	SEC14L2	2.81699	2.46305	-0.193706	0.0467893	0.0924237	FBXO7	3.5379	3.67903	0.0564332	0.165834	0.280272
SLC16A8	0.772338	0.47519	-0.700727	0.00346441	0.0195659	SEC14L3	0.0170069	0.0512283	1.59082	0.647929	0.701313	GTPBP1	3.26046	3.38651	0.0547232	0.144629	0.255685
CENPM	2.36486	2.03693	-0.215353	0.0589375	0.133511	SPECC1L	2.3454	2.74354	0.226205	1.27459e-07	3.81577e-06	RAB36	1.97712	2.16655	0.131999	0.331933	0.446918
2021-09-03	0.647988	0.863053	0.413481	0.0260483	0.0761962	PPIL2	2.67819	2.82933	0.0792042	0.086079	0.149058	TIMP3	1.61304	2.17895	0.433852	0.000257274	0.00313561
SLC5A1	3.49359	3.30311	-0.0808827	0.550191	0.629446	UPB1	0.0911565	0.123014	0.432403	0.00214309	0.00802502	PPP6R2	3.65687	3.79154	0.0521729	0.170058	0.285036
TPTEP1	0.314271	0.358758	0.191003	0.017038	0.0571395	YPEL1	0.42742	0.6406	0.583768	5.42284e-07	1.14155e-05	SBF1	3.45689	3.66831	0.0856428	0.0103567	0.0423074
SLC5A4	0.173503	0.342765	0.982258	0.0072175	0.0318705	SNRPD3	5.10626	4.97902	-0.0364048	0.0172207	0.0420931	SUN2	4.986	5.04855	0.0179839	0.672781	0.731722
KDELR3	4.72656	4.33258	-0.125563	0.00519166	0.0255885	PES1	4.2254	4.16499	-0.0207763	0.442424	0.522333	CYB5R3	5.41928	5.64386	0.058581	0.0148571	0.0542935
CYP2D6	0.579749	0.519117	-0.159368	0.227441	0.339365	MAPK1	3.29635	3.61698	0.133912	0.000522485	0.00261243	DNAL4	3.49218	3.46025	-0.0132511	0.455362	0.554814
DDX17	5.51639	5.42537	-0.024002	0.453345	0.547839	GGT1	3.02047	2.80755	-0.105459	0.330402	0.42004	MIOX	0.698016	0.623804	-0.162167	0.720034	0.770809
DMC1	0.192771	0.181821	-0.0843698	0.869412	0.89125	PPM1F	2.01136	2.43671	0.276757	4.30207e-07	9.6822e-06	LMF2	5.04639	4.87708	-0.0492348	0.0681476	0.153528
TCF20	2.86093	2.83761	-0.0118039	0.800559	0.834686	SLC35E4	1.4996	1.27389	-0.235338	0.0196982	0.0468692	RHBDD3	2.8613	2.88315	0.0109773	0.733743	0.782286
CBY1	3.26584	3.35629	0.039415	0.284331	0.395323	TOP3B	0.103183	0.115013	0.156589	0.209063	0.296902	PACSIN2	5.04936	4.88243	-0.0485018	0.0152363	0.055186
TOMM22	4.87105	4.73604	-0.0405501	0.17917	0.287669	CRYBB3	0.552456	0.49445	-0.160035	0.121789	0.195357	TTLL1	2.3481	2.47857	0.0780177	0.197109	0.314973
RSPH14	0.432811	0.446915	0.0462654	0.837959	0.865641	CYTH4	1.47002	2.09627	0.511985	1.46347e-05	0.00015197	RASL10A	0.328757	0.412932	0.328882	0.0602692	0.14175
RTCB	4.77965	4.80666	0.00812819	0.566364	0.642376	DGCR14	1.97323	2.06262	0.0639216	0.159759	0.241039	AP1B1	4.34441	4.50473	0.0522793	0.0654323	0.149365
JOSD1	4.45218	4.32481	-0.0418755	0.259836	0.371558	MFNG	2.68347	2.8566	0.0901982	0.136468	0.213406	HMGXB4	2.17095	2.3358	0.105589	0.0251224	0.0780843
GTPBP1	3.42379	3.26046	-0.070516	0.118796	0.216595	CARD10	3.89106	3.28075	-0.246135	1.92765e-05	0.000188746	TOM1	3.73478	3.9539	0.0822507	0.0168398	0.0590644
POLDIP3	4.50463	4.5771	0.023028	0.287954	0.398951	LRP5L	1.3999	1.23925	-0.175858	0.137935	0.215007	NEFH	0.666392	0.981943	0.559268	0.00387876	0.0213472
RAB36	1.7568	1.97712	0.170452	0.0622375	0.138594	SLC25A1	5.3347	5.0572	-0.0770662	0.00389383	0.0129238	CHKB	1.24712	1.40909	0.176162	0.0881349	0.182853
TIMP3	1.29643	1.61304	0.315236	0.0589375	0.133511	ADRBK2	1.48992	2.10655	0.499644	2.82008e-06	4.12643e-05	HMOX1	3.72544	4.22752	0.182404	0.000611146	0.00590156
PPP6R2	3.76223	3.65687	-0.0409773	0.280739	0.391907	PLA2G3	0.255079	0.172346	-0.56564	0.0961702	0.162457	MCAT	2.96769	2.82482	-0.071184	0.0428752	0.112233
SBF1	3.65349	3.45689	-0.0798029	0.0668738	0.14559	LGALS2	3.57869	3.32004	-0.10823	0.518217	0.590264	THOC5	1.90485	2.04223	0.100468	0.0028053	0.0170724
SUN2	4.74725	4.986	0.0707913	0.0288602	0.0814471	GGA1	2.98645	2.94619	-0.019579	0.529049	0.600002	MCM5	2.83849	2.92621	0.0439102	0.588476	0.664605
CYB5R3	5.35015	5.41928	0.0185209	0.393046	0.495646	HIRA	2.13956	2.28821	0.0969033	0.0367952	0.0766233	ARSA	4.18339	4.15313	-0.0104739	0.979966	0.983918
DNAL4	3.5552	3.49218	-0.0258033	0.544851	0.624999	SH3BP1	2.34672	2.2008	-0.0926175	0.410187	0.493713	TSPO	6.78184	6.3991	-0.0838076	0.1168	0.221467
MIOX	0.71012	0.698016	-0.0248036	0.709208	0.761362	SEZ6L	0.485589	1.36234	1.48828	4.21e-05	0.000352371	RASD2	1.52982	1.67253	0.128678	0.0723936	0.159833
LMF2	4.86981	5.04639	0.0513884	0.0589375	0.133511	LGALS1	7.83624	8.36528	0.0942512	0.00550797	0.0171135	TTLL12	4.16521	4.00995	-0.0548041	0.210094	0.328516
PACSIN2	5.04419	5.04936	0.00148005	0.782024	0.819486	HPS4	2.3566	2.31592	-0.0251183	0.283213	0.374195	CBX7	2.75103	2.92955	0.0907102	0.311863	0.429439
TTLL1	2.28251	2.3481	0.0408729	0.492908	0.581398	PIK3IP1	4.07968	4.55606	0.159328	8.52059e-05	0.000613662	PDGFB	3.22835	3.69898	0.19633	0.000323703	0.00372007
AP1B1	4.17942	4.34441	0.0558568	0.0345825	0.09197	RP1-37E16.12	0.00645932	0.00468403	-0.463633	0.653817	0.706462	ACR	0.0819494	0.118612	0.533449	0.00792643	0.0350367
HMGXB4	2.26854	2.17095	-0.0634354	0.277178	0.388508	SRRD	2.12327	2.23746	0.0755742	0.127922	0.20282	RPL3	8.76852	8.64749	-0.0200525	0.0514981	0.127389
TOM1	3.85585	3.73478	-0.0460242	0.310343	0.420468	PATZ1	2.94244	3.07138	0.0618734	0.142406	0.220406	RBFOX2	3.15598	3.55884	0.173319	2.5087e-07	1.80798e-05
NEFH	0.437382	0.666392	0.607479	0.000912567	0.0081847	TRIOBP	2.13121	1.97423	-0.110388	0.0512499	0.0993678	SYNGR1	2.03994	1.94798	-0.0665509	0.256544	0.375486
CHKB	1.48972	1.24712	-0.256437	0.016309	0.0553118	TFIP11	2.49767	2.67941	0.101331	0.00967709	0.0267537	TAB1	3.07095	3.03466	-0.0171509	0.268207	0.387278
BIK	4.86407	4.0425	-0.266916	0.000322065	0.00423303	GCAT	2.72183	2.28621	-0.25162	0.00337868	0.0115182	ASCC2	3.66743	3.77285	0.040884	0.109531	0.211911
HMOX1	3.26136	3.72544	0.191934	0.00281389	0.0170418	CRYBB1	0.392941	0.747673	0.928096	5.39582e-08	2.07504e-06	MTMR3	0.863889	0.980367	0.182476	0.00837072	0.0363643
MCAT	2.99845	2.96769	-0.0148768	0.819208	0.850008	ANKRD54	2.57617	2.61307	0.0205211	0.675424	0.723913	MIEF1	2.59178	2.67924	0.0478851	0.248968	0.367996
THOC5	1.91683	1.90485	-0.00904594	0.819208	0.850008	EIF3L	4.53284	5.01218	0.145023	4.31195e-05	0.00035912	APOL4	1.86591	1.90597	0.0306496	0.643058	0.7082
MCM5	2.76884	2.83849	0.0358413	0.566364	0.642376	MICALL1	2.80255	2.94493	0.071493	0.189654	0.275523	PNPLA5	0.0109692	0.0391093	1.83406	0.0474893	0.120689
APOBEC3H	0.538128	0.690227	0.359123	0.0547647	0.12681	POLR2F	0.0613386	0.0597147	-0.0387104	0.878783	0.897517	APOL1	6.23641	6.54098	0.0687919	0.22543	0.344261
ARSA	4.10212	4.18339	0.0283027	0.616205	0.684003	CCDC134	1.66332	1.77119	0.0906574	0.11461	0.186186	PNPLA3	0.560325	0.70055	0.322224	0.0584222	0.138728
TSPO	7.28701	6.78184	-0.10365	0.0116616	0.044008	DEPDC5	1.38446	1.5904	0.200061	0.000271709	0.00154699	MYH9	7.22054	7.50886	0.0564888	0.000372232	0.00412376
TTLL12	4.54646	4.16521	-0.126354	0.00766277	0.0330893	PICK1	3.06814	2.85749	-0.102618	0.00937	0.0260455	CACNA1I	0.156896	0.249954	0.671854	0.0738561	0.162212
CBX7	2.39595	2.75103	0.199371	0.000102083	0.00204723	TTC28	1.10954	1.61849	0.54468	6.92699e-09	4.47987e-07	SAMM50	2.87655	2.93884	0.0309105	0.500659	0.591351
ACR	0.0663111	0.0819494	0.305482	0.39294	0.495646	SLC16A8	0.772338	0.577982	-0.418209	0.145449	0.224098	TXN2	4.98041	4.90506	-0.0219928	0.171484	0.286644
CABP7	0.640546	1.15605	0.851835	0.000284573	0.00391705	CENPM	2.36486	1.94232	-0.283974	0.0108238	0.0292631	FOXRED2	1.73915	1.85928	0.0963597	0.114686	0.218641
RPL3	8.69642	8.76852	0.0119124	0.263243	0.374991	2021-09-03	0.647988	1.15844	0.838137	1.02535e-05	0.000114841	GRAP2	0.693738	0.809453	0.222556	0.477717	0.5728
ZMAT5	1.98274	2.02392	0.0296597	0.277178	0.388508	SLC5A1	3.49359	2.86568	-0.285829	0.0234822	0.0537567	EIF3D	5.59932	5.63782	0.0098849	0.652906	0.715906
RBFOX2	3.06182	3.15598	0.0436986	0.302755	0.413051	TPTEP1	0.314271	0.461572	0.554548	8.32622e-05	0.000602389	TNRC6B	1.42954	1.64074	0.198802	0.00161783	0.0117243
SYNGR1	1.61327	2.03994	0.338541	0.000411315	0.00494995	SLC5A4	0.173503	0.33228	0.937438	7.76795e-05	0.000570207	SGSM3	4.49954	4.3259	-0.0567775	0.280228	0.399288
TAB1	2.92873	3.07095	0.0684106	0.0412473	0.103893	KDELR3	4.72656	4.39919	-0.103554	0.130723	0.206291	IFT27	1.8213	1.96995	0.113189	0.0124276	0.0480233
ASCC2	3.78039	3.66743	-0.043763	0.221323	0.332687	DDX17	5.51639	5.65818	0.0366126	0.137935	0.215007	KIAA0930	3.32002	3.56758	0.103754	0.00461036	0.0240723
MTMR3	0.796225	0.863889	0.11767	0.0770003	0.160595	DMC1	0.192771	0.233405	0.275944	0.0989627	0.16599	NCF4	2.89643	3.12502	0.10959	0.322912	0.439199
MIEF1	2.48948	2.59178	0.0580944	0.107842	0.202434	TCF20	2.86093	3.02393	0.0799435	0.0455765	0.0904835	CSF2RB	2.09797	2.44579	0.22131	0.114686	0.218641
APOL4	1.48867	1.86591	0.325852	0.0101598	0.0399759	HSCB	2.82741	2.80154	-0.0132646	0.856963	0.878866	SLC25A17	2.47604	2.65036	0.0981565	0.0023416	0.0151278
APOL1	6.59756	6.23641	-0.0812178	0.0783497	0.162468	CBY1	3.26584	3.39474	0.0558476	0.0891655	0.15319	UPK3A	0.537483	0.643757	0.260297	0.536138	0.620543
PNPLA3	0.777655	0.560325	-0.472865	0.00679602	0.0305008	TOMM22	4.87105	4.70868	-0.0489094	0.0945072	0.160044	FAM118A	2.30624	2.54326	0.141138	0.0141235	0.0524455
MYH9	7.05031	7.22054	0.0344197	0.0883429	0.176433	RSPH14	0.432811	0.39524	-0.131009	0.126539	0.201173	KCTD17	2.82864	3.09024	0.12761	0.00673255	0.0313995
CACNA1I	0.074606	0.156896	1.07244	0.00169094	0.0121835	RTCB	4.77965	4.82618	0.013977	0.432604	0.513745	ST13	5.35458	5.57145	0.0572795	0.0028053	0.0170724
SAMM50	2.88093	2.87655	-0.00219962	0.831698	0.860636	JOSD1	4.45218	4.50845	0.0181191	0.217217	0.305632	IL2RB	1.70621	1.89364	0.150365	0.338804	0.453272
TXN2	4.98611	4.98041	-0.00165083	0.977607	0.981504	FBXO7	3.55036	3.67903	0.0513607	0.0338962	0.0718927	RBX1	3.94912	4.09109	0.0509526	0.0548691	0.133048
[truncated: 26,652 more rows]
